# Supplementary material for: Menopausal hormone therapy and women’s health: An umbrella review
Source: PubMed Central journal article supplement (PMC8366967; doi:10.1371/journal.pmed.1003731), 2021-08-02
Supplement: pmed.1003731.s002.pdf [file pmed.1003731.s002.pdf]

## Supplementary Online Content

*CLICK on a section to jump to it*

**Results.** Supplementary Results for Umbrella Review on Menopausal Hormone Therapy and Women's Health

**Table A.** Search Strategies Used to Retrieve Papers from Different Databases

**Table B.** Characteristics of Included Systematic Reviews and/or Meta-Analyses of Randomized Controlled Trials on Menopausal Hormone Therapy and Multiple Outcomes

**Table C.** Characteristics of Included Systematic Reviews and/or Meta-Analyses of Observational Epidemiological Studies on Menopausal Hormone Therapy and Multiple Outcomes

**Table D.** Quality Assessment of Included Systematic Reviews and/or Meta-Analyses of Randomized Controlled Trials on Menopausal Hormone Therapy and Multiple Outcomes

**Table E.** Quality Assessment of Included Systematic Reviews and/or Meta-Analyses of Observational Epidemiological Studies on Menopausal Hormone Therapy and Multiple Outcomes

**Table F.** Any Menopausal Hormone Therapy for Primary Prevention of Multiple Outcomes in Included Systematic Reviews and Meta-Analyses of Randomized Controlled Trials

**Table G.** Estrogen-Alone Therapy for Primary Prevention of Multiple Outcomes in Included Systematic Reviews and Meta-Analyses of Randomized Controlled Trials

**Table H.** Estrogen Plus Progestin Therapy for Primary Prevention of Multiple Outcomes in Included Systematic Reviews and Meta-Analyses of Randomized Controlled Trials

**Table I.** Any Menopausal Hormone Therapy for Secondary Prevention of Multiple Outcomes in Included Systematic Reviews and Meta-Analyses of Randomized Controlled Trials

**Table J.** Estrogen-Alone Therapy for Secondary Prevention of Multiple Outcomes in Included Systematic Reviews and Meta-Analyses of Randomized Controlled Trials

**Table K.** Estrogen Plus Progestin Therapy for Secondary Prevention of Multiple Outcomes in Included Systematic Reviews and Meta-Analyses of Randomized Controlled Trials

**Table L.** Any Menopausal Hormone Therapy for Primary Prevention of Multiple Outcomes in Included Systematic Reviews and Meta-Analyses of Observational Epidemiological Studies

**Table M.** Estrogen-Alone Therapy for Primary Prevention of Multiple Outcomes in Included Systematic Reviews and Meta-Analyses of Observational Epidemiological Studies

**Table N.** Estrogen Plus Progestin Therapy for Primary Prevention of Multiple Outcomes in Included Systematic Reviews and Meta-Analyses of Observational Epidemiological Studies

**Table O.** Any Menopausal Hormone Therapy for Secondary Prevention of Multiple Outcomes in Included Systematic Reviews and Meta-Analyses of Observational Epidemiological Studies

**Table P.** Estrogen-Alone Therapy for Secondary Prevention of Multiple Outcomes in Included Systematic Reviews and Meta-Analyses of Observational Epidemiological Studies

**Table Q.** Estrogen Plus Progestin Therapy for Secondary Prevention of Multiple Outcomes in Included Systematic Reviews and Meta-Analyses of Observational Epidemiological Studies

**Table R.** Assessment of Small-Study Effects and Publication Bias: Any Menopausal Hormone Therapy for Primary Prevention of Multiple Outcomes in Included Systematic Reviews and Meta-Analyses of Randomized Controlled Trials

**Table S.** Assessment of Small-Study Effects and Publication Bias: Any Menopausal Hormone Therapy for Secondary Prevention of Multiple Outcomes in Included Systematic Reviews and Meta-Analyses of Randomized Controlled Trials

**Table T.** Assessment of Small-Study Effects and Publication Bias: Any Menopausal Hormone Therapy for Primary Prevention of Multiple Outcomes in Included Systematic Reviews and Meta-Analyses of Observational Epidemiological Studies

**Table U.** Sensitivity Analysis for Residual Confounding: Any Menopausal Hormone Therapy for Primary Prevention of Multiple Outcomes in Included Systematic Reviews and Meta-Analyses of Observational Epidemiological Studies

**Table V.** Assessment of Small-Study Effects and Publication Bias: Any Menopausal Hormone Therapy for Secondary Prevention of Multiple Outcomes in Included Systematic Reviews and Meta-Analyses of Observational Epidemiological Studies

**Table W.** Sensitivity Analysis for Residual Confounding: Any Menopausal Hormone Therapy for Secondary Prevention of Multiple Outcomes in Included Systematic Reviews and Meta-Analyses of Observational Epidemiological Studies

**Table X.** Summary of Results for Outcomes with No Available Data for Meta-Analysis

**Fig A.** Pre-specified Protocol for Extracting Data from Included Systematic Reviews and/or Meta-Analyses of Randomized Controlled Trials on Menopausal Hormone Therapy and Multiple Outcomes

**Fig B.** Pre-specified Protocol for Extracting Data from Included Systematic Reviews and/or Meta-Analyses of Observational Epidemiological Studies on Menopausal Hormone Therapy and Multiple Outcomes

**Fig C.** Consistent or Highly Suggestive Evidence from Meta-Analyses of Randomized Controlled Trials on Menopausal Hormone Therapy and Multiple Surrogate Outcomes

**Fig D.** Suggestive Evidence from Meta-Analyses of Randomized Controlled Trials on Menopausal Hormone Therapy and Incidence of Diseases and Other Health Outcomes

**Fig E.** Suggestive Evidence from Meta-Analyses of Observational Epidemiological Studies on Menopausal Hormone Therapy and Incidence of Diseases and Other Health Outcomes

**References**

## Results. Supplementary Results for Umbrella Review on Menopausal Hormone Therapy and Women's Health

### Results for Outcomes with Suggestive or Controversial Evidence

[Fig D](#) and [Fig E](#) present the risk ratios (RRs) with 95% confidence intervals (CIs) for outcomes with suggestive evidence from meta-analyses of randomized controlled trials (RCTs) and of observational epidemiological studies, respectively. Below we described the meta-analysis results for outcomes with suggestive or controversial evidence.

#### Outcomes with suggestive evidence

**Neoplasms.** In RCTs, estrogen plus progestin therapy (EPT) was associated with a decreased risk of endometrial cancer (RR 0.67, 95% CI 0.50-0.92), but an increased risk of breast cancer (1.24, 95% CI 1.10-1.40). Estrogen-alone therapy (ET) was associated with a decreased risk of breast cancer (0.82, 95% CI 0.70-0.97). In observational studies, among breast and lung cancer survivors, women using menopausal hormone therapy (MHT) after diagnosis had a decreased risk of breast cancer recurrence (0.72, 95% CI 0.57-0.91), and women using MHT before diagnosis had improved lung cancer overall survival (0.77, 95% CI 0.65-0.92). ET and EPT were associated with increased risks of cutaneous melanoma (2.08, 95% CI 1.38-3.14) and endometrial cancer (1.71, 95% CI 1.57-1.86), respectively.

**Diseases of the circulatory system.** In RCTs, EPT was associated with an increased risk of pulmonary embolism (RR 1.28, 95% CI 1.02-1.61). In observational studies, MHT was associated with a decreased risk of coronary heart disease mortality (0.67, 95% CI 0.53-0.85).

**Genitourinary system.** In RCTs, intravaginal ET was associated with a decreased risk of recurrent urinary tract infection (RR 0.64, 95% CI 0.47-0.86). ET was associated with an increased risk of irregular vaginal bleeding (1.73, 95% CI 1.10-2.71).

**Functioning assessment.** In RCTs, EPT was associated with improved sleep quality (RR 0.92, 95% CI 0.89-0.95) and skeletal muscle strength (0.65, 95% CI 0.46-0.93).

**Bone loss and fracture.** In RCTs, EPT was associated with a decreased risk of hip fracture (RR 0.82, 95% CI 0.69-0.97).

**Mental or behavioural disorders.** In RCTs, EPT was associated with an increased risk of dementia (RR 1.97, 95% CI 1.16-3.33).

**Diseases of the nervous system.** In observational studies, MHT was associated with an increased risk of Parkinson's disease (RR 1.24, 95% CI 1.00-1.53).

**Endocrine, nutritional or metabolic diseases.** In observational studies, MHT was associated with a decreased risk of diabetes mellitus (RR 0.63, 95% CI 0.46-0.87).

**Diseases of the immune system.** In observational studies, MHT was associated with an increased risk of systemic lupus erythematosus (RR 1.90, 95% CI 1.16-3.10).

**Others, not elsewhere classified.** In observational studies, MHT was associated with decreased risks of cardiovascular disease incidence (RR 0.77, 95% CI 0.68-0.87) and mortality (0.66, 95% CI 0.48-0.90).

#### Outcomes with controversial evidence

In observational studies, contradictory evidence existed for breast cancer mortality, with predictive distribution containing a non-negligible proportion (> 30%) of strong beneficial (RR < 0.9) and harmful (> 1.1) effects. Controversial results were also found for pancreatic and lung cancer ([Table L](#)).

#### Small-Study Effects

In meta-analyses of RCTs, small-study effects were present for all fracture, sexual function, urinary incontinence and deep vein thrombosis ([Table R](#) and [Table S](#)). In meta-analyses of observational studies, small-

study effects were present for breast cancer specific survival and overall survival, and glioma ([Table T](#) and [Table V](#)).

### **Publication Bias**

In meta-analyses of RCTs, meta-analysis results were robust to severe or extreme publication bias for vasomotor symptom, all fracture, stroke, non-fatal stroke, venous thromboembolism, gallbladder disease requiring surgery, and endometrial hyperplasia (ET) ([Table R](#) and [Table S](#)). In meta-analyses of observational studies, meta-analysis results were robust to severe or extreme publication bias for esophageal, gastric and colorectal cancer, breast cancer (EPT), breast cancer (ET), breast cancer specific survival and overall survival, endometrial cancer (ET), ovarian cancer incidence and overall survival, coronary heart disease, venous thromboembolism, asthma and cholelithiasis ([Table T](#) and [Table V](#)).

### **Residual Confounding in Meta-Analyses of Observational Studies**

In general, the meta-analysis results were not robust to severe residual confounding. Using an arbitrary cutoff of RR 3.0, that is, the minimum confounding association strength that residual confounder(s) would need to have with both the exposure and outcome to explain away the meta-analysis results, only two outcomes (breast cancer and endometrial cancer) surpassed this threshold ([Table U](#) and [Table W](#)).

**Table A. Search Strategies Used to Retrieve Papers from Different Databases**

| <b>Databases</b>                                          | <b>Date Searched</b> | <b>No. of Papers Retrieved</b> | <b>Search Terms Used for Search Strategies</b>                                                                                                                                                                                                                                                                                                                                                                                                                                                                                                                                                                                                                                                                                                                                                                                                                                                                                                                           |
|-----------------------------------------------------------|----------------------|--------------------------------|--------------------------------------------------------------------------------------------------------------------------------------------------------------------------------------------------------------------------------------------------------------------------------------------------------------------------------------------------------------------------------------------------------------------------------------------------------------------------------------------------------------------------------------------------------------------------------------------------------------------------------------------------------------------------------------------------------------------------------------------------------------------------------------------------------------------------------------------------------------------------------------------------------------------------------------------------------------------------|
| EMBASE (OVID)                                             | 2017-11-26           | 7,698                          | <ol style="list-style-type: none"> <li>1. hormone replacement therapy.mp. OR exp hormone substitution/</li> <li>2. hormonal therapy.mp. OR exp hormonal therapy/</li> <li>3. hormone replacement.mp.</li> <li>4. hormone treatment.mp.</li> <li>5. *conjugated estrogen/ OR *estradiol/ OR *estrogen/ OR combined hormone therapy.mp.</li> <li>6. estrogen therapy.mp. OR exp estrogen therapy/</li> <li>7. *medroxyprogesterone acetate/ OR *estradiol plus norethisterone acetate/ OR *conjugated estrogen plus medroxyprogesterone acetate/ OR estrogen-progestin therapy.mp. OR *bazedoxifene plus conjugated estrogen/</li> <li>8. 1 OR 2 OR 3 OR 4 OR 5 OR 6 OR 7</li> <li>9. exp meta analysis/</li> <li>10. exp "systematic review"/</li> <li>11. (systematic\$ adj2 (review\$ OR overview)).ti,ab.</li> <li>12. (meta?anal\$ OR meta anal\$ OR meta-anal\$ OR metaanal\$ OR metanal\$).ti,ab.</li> <li>13. 9 OR 10 OR 11 OR 12</li> <li>14. 8 AND 13</li> </ol> |
| AMED (OVID)                                               | 2017-11-26           | 3                              | Same as EMBASE                                                                                                                                                                                                                                                                                                                                                                                                                                                                                                                                                                                                                                                                                                                                                                                                                                                                                                                                                           |
| Global Health (OVID)                                      | 2017-11-26           | 129                            | Same as EMBASE                                                                                                                                                                                                                                                                                                                                                                                                                                                                                                                                                                                                                                                                                                                                                                                                                                                                                                                                                           |
| PsycINFO (OVID)                                           | 2017-11-26           | 35                             | Same as EMBASE                                                                                                                                                                                                                                                                                                                                                                                                                                                                                                                                                                                                                                                                                                                                                                                                                                                                                                                                                           |
| CAB International (OVID)                                  | 2017-11-26           | 44                             | Same as EMBASE                                                                                                                                                                                                                                                                                                                                                                                                                                                                                                                                                                                                                                                                                                                                                                                                                                                                                                                                                           |
| Cochrane Library, Cochrane Database of Systematic Reviews | 2017-11-26           | 893                            | <ol style="list-style-type: none"> <li>1. hormone replacement therapy</li> <li>2. estrogen therapy</li> <li>3. estrogen-progestin</li> <li>4. combined hormone therapy</li> <li>5. systematic review</li> <li>6. meta-analysis</li> <li>7. 1 OR 2 OR 3 OR 4</li> <li>8. 5 OR 6</li> <li>9. 7 AND 8</li> </ol>                                                                                                                                                                                                                                                                                                                                                                                                                                                                                                                                                                                                                                                            |

**Table A. Search Strategies Used to Retrieve Papers from Different Databases (continued)**

| <b>Databases</b>                                                                   | <b>Date Searched</b> | <b>No. of Papers Retrieved</b> | <b>Search Terms Used for Search Strategies</b>                                                                                                                                                                                                                                                                                                                                                                                                                                                                                                                                                                                                                                                                                                                               |
|------------------------------------------------------------------------------------|----------------------|--------------------------------|------------------------------------------------------------------------------------------------------------------------------------------------------------------------------------------------------------------------------------------------------------------------------------------------------------------------------------------------------------------------------------------------------------------------------------------------------------------------------------------------------------------------------------------------------------------------------------------------------------------------------------------------------------------------------------------------------------------------------------------------------------------------------|
| MEDLINE (OVID)                                                                     | 2017-11-24           | 1,100                          | <ol style="list-style-type: none"> <li>1. hormone replacement therapy.mp. OR exp hormone replacement therapy/</li> <li>2. exp estrogen replacement therapy/ OR hormone therapy.mp.</li> <li>3. hormone treatment.mp.</li> <li>4. estrogen therapy.mp.</li> <li>5. hormone replacement.mp.</li> <li>6. combined hormone therapy.mp.</li> <li>7. "estrogens, conjugated (USP)"/ OR estrogen-progestin therapy.mp.</li> <li>8. hormonal therapy.mp.</li> <li>9. 1 OR 2 OR 3 OR 4 OR 5 OR 6 OR 7 OR 8</li> <li>10. systematic review.mp.</li> <li>11. (systematic\$ adj2 (review\$ OR overview)).ti,ab.</li> <li>12. (systematic\$ adj5 review\$).tw,sh.</li> <li>13. meta-analysis.mp. OR exp meta-analysis/</li> <li>14. 10 OR 11 OR 12 OR 13</li> <li>15. 9 AND 14</li> </ol> |
| CINAHL                                                                             | 2017-11-26           | 26                             | <ol style="list-style-type: none"> <li>1. (MH "Hormone Replacement Therapy+") OR (MH "Hormone Therapy+") OR (MM "Estrogens, Conjugated") OR "hormone replacement therapy OR estrogen therapy OR combined hormone therapy OR estrogen-progestin therapy"</li> <li>2. (MM "Systematic Review") OR (MM "Meta Analysis") OR "systematic review OR meta-analysis"</li> <li>3. 1 AND 2</li> </ol>                                                                                                                                                                                                                                                                                                                                                                                  |
| ISI Web of Science, ISI Conference Proceedings Citation Index via Web of Knowledge | 2017-11-26           | 313                            | <ol style="list-style-type: none"> <li>1. TS=hormone replacement therapy</li> <li>2. TS=estrogen therapy</li> <li>3. TS=combined hormone therapy</li> <li>4. 1 OR 2 OR 3</li> <li>5. TS=systematic review</li> <li>6. TS=meta-analysis</li> <li>7. 5 OR 6</li> <li>8. 4 AND 7</li> </ol>                                                                                                                                                                                                                                                                                                                                                                                                                                                                                     |
| NOTE: Excluding MEDLINE database                                                   |                      |                                |                                                                                                                                                                                                                                                                                                                                                                                                                                                                                                                                                                                                                                                                                                                                                                              |

**Table A. Search Strategies Used to Retrieve Papers from Different Databases (continued)**

| <b>Databases</b>                                   | <b>Date Searched</b> | <b>No. of Papers Retrieved</b> | <b>Search Terms Used for Search Strategies</b>                                                                                                                                                                                                                                                                                                                                                                                                     |
|----------------------------------------------------|----------------------|--------------------------------|----------------------------------------------------------------------------------------------------------------------------------------------------------------------------------------------------------------------------------------------------------------------------------------------------------------------------------------------------------------------------------------------------------------------------------------------------|
| Database of Abstracts of Reviews of Effects (DARE) | 2017-11-26           | 107                            | hormone replacement therapy AND systematic review                                                                                                                                                                                                                                                                                                                                                                                                  |
| Google Scholar                                     | 2017-11-26           | First 200 hits                 | <ol style="list-style-type: none"> <li>1. "hormone replacement therapy" OR "estrogen therapy" OR "combined hormone therapy" OR "estrogen-progestin therapy" OR "hormone therapy"</li> <li>2. "systematic review" OR "meta-analysis"</li> <li>3. 1 AND 2</li> </ol>                                                                                                                                                                                 |
| WHO Global Health Library                          | 2017-11-26           | 2                              | <ol style="list-style-type: none"> <li>1. (tw:(hormone replacement therapy)) OR (tw:(estrogen therapy)) OR (tw:(combined hormone therapy)) OR (tw:(estrogen-progestin therapy)) OR (tw:(hormone therapy))</li> <li>2. (tw:(systematic review)) OR (tw:(meta-analysis))</li> <li>3. (instance:"ghl")</li> <li>4. (db:("WPRIM" OR "IMEMR" OR "BBO" OR "WHOLIS") AND type_of_study:("systematic_reviews"))</li> <li>5. 1 AND 2 AND 3 AND 4</li> </ol> |
| NOTE: Excluding MEDLINE database                   |                      |                                |                                                                                                                                                                                                                                                                                                                                                                                                                                                    |
| Total                                              | 2017-11-26           | 10,550                         |                                                                                                                                                                                                                                                                                                                                                                                                                                                    |
| Total after de-duplication                         | 2017-11-26           | 9,167                          |                                                                                                                                                                                                                                                                                                                                                                                                                                                    |

**Table B. Characteristics of Included Systematic Reviews and/or Meta-Analyses of Randomized Controlled Trials on Menopausal Hormone Therapy and Multiple Outcomes**

| Outcome <sup>a</sup> | Reference                      | Study Design | No. of Studies | Population            | Intervention <sup>b</sup> | Comments                                                                                                                                                                                                 |
|----------------------|--------------------------------|--------------|----------------|-----------------------|---------------------------|----------------------------------------------------------------------------------------------------------------------------------------------------------------------------------------------------------|
| <b>Neoplasms</b>     |                                |              |                |                       |                           |                                                                                                                                                                                                          |
| All cancer           |                                |              |                |                       |                           |                                                                                                                                                                                                          |
| Incidence            | Zhu 2016 <sup>1</sup>          | RCT          | 12             | PM                    | E/EP                      | The review only searched for studies of MHT and fracture; we added the 2 WHI hormone therapy trials <sup>2</sup> missing from Zhu 2016 review                                                            |
| Mortality            | Marjoribanks 2017 <sup>3</sup> | DBRCT        | 5              | PM                    | E/EP ≥12 mo <sup>c</sup>  | We added 1 trial that was not included for mortality in Marjoribanks 2017 review; additionally included 1 trial from Benkhadra 2015 <sup>4</sup>                                                         |
| Colorectal cancer    |                                |              |                |                       |                           |                                                                                                                                                                                                          |
| Incidence            | Marjoribanks 2017 <sup>3</sup> | DBRCT        | 8              | PM                    | E/EP ≥12 mo <sup>c</sup>  |                                                                                                                                                                                                          |
| Mortality            | Marjoribanks 2017 <sup>3</sup> | DBRCT        | 2              | PM                    | E/EP ≥12 mo <sup>c</sup>  |                                                                                                                                                                                                          |
| Lung cancer          |                                |              |                |                       |                           |                                                                                                                                                                                                          |
| Incidence            | Marjoribanks 2017 <sup>3</sup> | DBRCT        | 4              | PM                    | E/EP ≥12 mo <sup>c</sup>  | We added 1 trial that was not included for incidence in Marjoribanks 2017 review                                                                                                                         |
| Mortality            | Marjoribanks 2017 <sup>3</sup> | DBRCT        | 4              | PM                    | E/EP ≥12 mo <sup>c</sup>  | We added 1 trial that was not included for mortality in Marjoribanks 2017 review                                                                                                                         |
| Breast cancer        |                                |              |                |                       |                           |                                                                                                                                                                                                          |
| Incidence            | Marjoribanks 2017 <sup>3</sup> | DBRCT        | 15             | PPM                   | E/EP ≥12 mo <sup>c</sup>  |                                                                                                                                                                                                          |
| Recurrence           | Col 2005 <sup>5</sup>          | RCT          | 4              | PM with breast cancer | E/EP after diagnosis      | We additionally included 1 trial from Marjoribanks 2017 <sup>3</sup>                                                                                                                                     |
| Mortality            | Benkhadra 2015 <sup>4</sup>    | RCT          | 4              | PM                    | E/EP                      | RCTs with follow-up of ≥6 mo; the review combined breast cancer mortality with breast cancer survival; we excluded 1 study; added 2 trials that were not included for mortality in Benkhadra 2015 review |
| Endometrial cancer   | Marjoribanks 2017 <sup>3</sup> | DBRCT        | 6              | PPM                   | E/EP ≥12 mo <sup>c</sup>  |                                                                                                                                                                                                          |



**Table B. Characteristics of Included Systematic Reviews and/or Meta-Analyses of Randomized Controlled Trials on Menopausal Hormone Therapy and Multiple Outcomes (continued)**

| Outcome <sup>a</sup>                                                                             | Reference                      | Study Design | No. of Studies | Population             | Intervention <sup>b</sup>      | Comments                                                                                 |
|--------------------------------------------------------------------------------------------------|--------------------------------|--------------|----------------|------------------------|--------------------------------|------------------------------------------------------------------------------------------|
| Ovarian cancer                                                                                   |                                |              |                |                        |                                |                                                                                          |
| Incidence                                                                                        | Marjoribanks 2017 <sup>3</sup> | DBRCT        | 2              | PM                     | E/EP $\geq$ 12 mo <sup>c</sup> |                                                                                          |
| Overall survival                                                                                 | Li 2015 <sup>6</sup>           | RCT          | 2              | PM with ovarian cancer | E/EP after diagnosis           | The review included only patients who had received surgical treatment for ovarian cancer |
| <b>Symptoms, signs or clinical findings of blood, blood-forming organs, or the immune system</b> |                                |              |                |                        |                                |                                                                                          |
| C-reactive protein                                                                               | Salpeter 2006 <sup>7</sup>     | RCT          | 12             | PM without diabetes    | E/EP $\geq$ 2 mo <sup>d</sup>  | We excluded 3 studies                                                                    |
| C-reactive protein                                                                               | Casanova 2015 <sup>8</sup>     | RCT          | 4              | Healthy PM             | E/EP <sup>e</sup>              | We excluded 1 study                                                                      |
| Immunological factors                                                                            | Abdi 2016 <sup>9</sup>         | Unclear      | 13             | PM                     | Unclear                        | Unclear on the type of MHT and control; no meta-analysis conducted                       |
| PAI-1 antigen                                                                                    | Salpeter 2006 <sup>7</sup>     | RCT          | 13             | PM without diabetes    | E/EP $\geq$ 2 mo <sup>d</sup>  | We excluded 3 studies                                                                    |
| Protein C                                                                                        | Salpeter 2006 <sup>7</sup>     | RCT          | Unclear        | PM without diabetes    | E/EP $\geq$ 2 mo <sup>d</sup>  |                                                                                          |
| Protein S                                                                                        | Salpeter 2006 <sup>7</sup>     | RCT          | Unclear        | PM without diabetes    | E/EP $\geq$ 2 mo <sup>d</sup>  |                                                                                          |
| Fibrinogen                                                                                       | Salpeter 2006 <sup>7</sup>     | RCT          | 20             | PM without diabetes    | E/EP $\geq$ 2 mo <sup>d</sup>  | We excluded 4 studies                                                                    |
| E-selectin                                                                                       | Salpeter 2006 <sup>7</sup>     | RCT          | 7              | PM without diabetes    | E/EP $\geq$ 2 mo <sup>d</sup>  | We excluded 1 study                                                                      |
| <b>Endocrine, nutritional or metabolic diseases</b>                                              |                                |              |                |                        |                                |                                                                                          |
| Diabetes mellitus                                                                                | Salpeter 2006 <sup>7</sup>     | RCT          | Unclear        | PM                     | E/EP $\geq$ 2 mo <sup>d</sup>  |                                                                                          |
| <b>Symptoms, signs or clinical findings of endocrine, nutritional or metabolic diseases</b>      |                                |              |                |                        |                                |                                                                                          |
| Fasting glucose                                                                                  | Salpeter 2006 <sup>7</sup>     | RCT          | Unclear        | PM with diabetes       | E/EP $\geq$ 2 mo <sup>d</sup>  |                                                                                          |
| Fasting glucose                                                                                  | Xu 2014 <sup>10</sup>          | RCT          | 5              | PM with diabetes       | Oral EP                        | We excluded 1 study                                                                      |
| Fasting glucose                                                                                  | Salpeter 2006 <sup>7</sup>     | RCT          | Unclear        | PM without diabetes    | E/EP $\geq$ 2 mo <sup>d</sup>  |                                                                                          |
| Fasting insulin                                                                                  | Salpeter 2006 <sup>7</sup>     | RCT          | Unclear        | PM with diabetes       | E/EP $\geq$ 2 mo <sup>d</sup>  |                                                                                          |

**Table B. Characteristics of Included Systematic Reviews and/or Meta-Analyses of Randomized Controlled Trials on Menopausal Hormone Therapy and Multiple Outcomes (continued)**

| Outcome <sup>a</sup> | Reference                     | Study Design | No. of Studies | Population                     | Intervention <sup>b</sup>     | Comments                                                                   |
|----------------------|-------------------------------|--------------|----------------|--------------------------------|-------------------------------|----------------------------------------------------------------------------|
| Fasting insulin      | Salpeter 2006 <sup>7</sup>    | RCT          | Unclear        | PM without diabetes            | E/EP $\geq 2$ mo <sup>d</sup> |                                                                            |
| Hemoglobin A1c       | Xu 2014 <sup>10</sup>         | RCT          | 4              | PM with diabetes               | Oral EP                       | We excluded 1 study                                                        |
| Insulin resistance   | Salpeter 2006 <sup>7</sup>    | RCT          | Unclear        | PM with diabetes               | E/EP $\geq 2$ mo <sup>d</sup> |                                                                            |
| Insulin resistance   | Salpeter 2006 <sup>7</sup>    | RCT          | 18             | PM without diabetes            | E/EP $\geq 2$ mo <sup>d</sup> |                                                                            |
| Total cholesterol    | Casanova 2015 <sup>8</sup>    | RCT          | 11             | Healthy PM                     | E/EP <sup>e</sup>             | We excluded 1 study                                                        |
| Total cholesterol    | Ramesh 2016 <sup>11</sup>     | RCT          | 2              | PM with chronic kidney disease | E/EP                          | The review combined observational studies with RCTs; we excluded 3 studies |
| Total cholesterol    | Xu 2014 <sup>10</sup>         | RCT          | 5              | PM with diabetes               | Oral EP                       | We excluded 2 studies                                                      |
| HDL cholesterol      | Casanova 2015 <sup>8</sup>    | RCT          | 12             | Healthy PM                     | E/EP <sup>e</sup>             | We excluded 1 study                                                        |
| HDL cholesterol      | Ramesh 2016 <sup>11</sup>     | RCT          | 2              | PM with chronic kidney disease | E/EP                          | We excluded 2 studies                                                      |
| HDL cholesterol      | Xu 2014 <sup>10</sup>         | RCT          | 5              | PM with diabetes               | Oral EP                       | We excluded 2 studies                                                      |
| HDL cholesterol      | Salpeter 2006 <sup>7</sup>    | RCT          | Unclear        | PM without diabetes            | E/EP $\geq 2$ mo <sup>d</sup> |                                                                            |
| LDL cholesterol      | Casanova 2015 <sup>8</sup>    | RCT          | 11             | Healthy PM                     | E/EP <sup>e</sup>             | We excluded 1 study                                                        |
| LDL cholesterol      | Ramesh 2016 <sup>11</sup>     | RCT          | 2              | PM with chronic kidney disease | E/EP                          | We excluded 2 studies                                                      |
| LDL cholesterol      | Xu 2014 <sup>10</sup>         | RCT          | 5              | PM with diabetes               | Oral EP                       | We excluded 2 studies                                                      |
| LDL cholesterol      | Salpeter 2006 <sup>7</sup>    | RCT          | Unclear        | PM without diabetes            | E/EP $\geq 2$ mo <sup>d</sup> |                                                                            |
| LDL/HDL ratio        | Salpeter 2006 <sup>7</sup>    | RCT          | 55             | PM without diabetes            | E/EP $\geq 2$ mo <sup>d</sup> | We excluded 6 studies                                                      |
| Lipoprotein (a)      | Anagnostis 2017 <sup>12</sup> | RCT          | 21             | PM                             | E/EP                          | RCTs with follow-up of $\geq 8$ wks; we excluded 3 studies                 |
| Triglyceride         | Casanova 2015 <sup>8</sup>    | RCT          | 10             | Healthy PM                     | E/EP <sup>e</sup>             | We excluded 1 study                                                        |
| Triglyceride         | Ramesh 2016 <sup>11</sup>     | RCT          | 2              | PM with chronic kidney disease | E/EP                          | The review combined observational studies with RCTs; we excluded 3 studies |

**Table B. Characteristics of Included Systematic Reviews and/or Meta-Analyses of Randomized Controlled Trials on Menopausal Hormone Therapy and Multiple Outcomes (continued)**

| Outcome <sup>a</sup>                                              | Reference                      | Study Design | No. of Studies | Population                        | Intervention <sup>b</sup>      | Comments                            |
|-------------------------------------------------------------------|--------------------------------|--------------|----------------|-----------------------------------|--------------------------------|-------------------------------------|
| Triglyceride                                                      | Xu 2014 <sup>10</sup>          | RCT          | 4              | PM with diabetes                  | Oral EP                        | We excluded 2 studies               |
| Triglyceride                                                      | Salpeter 2006 <sup>7</sup>     | RCT          | 52             | PM without diabetes               | E/EP $\geq 2$ mo <sup>d</sup>  | We excluded 2 studies               |
| Body mass index                                                   | Kongnyuy 1999 <sup>13</sup>    | RCT          | 12             | PM                                | E/EP $\geq 3$ mo               |                                     |
| Body mass index                                                   | Casanova 2015 <sup>8</sup>     | RCT          | 2              | Healthy PM                        | E/EP <sup>e</sup>              | We excluded 1 study                 |
| Body mass index                                                   | Xu 2014 <sup>10</sup>          | RCT          | 2              | PM with diabetes                  | Oral EP                        |                                     |
| Body weight                                                       | Kongnyuy 1999 <sup>13</sup>    | RCT          | 18             | PPM                               | E/EP $\geq 3$ mo               |                                     |
| Lean body mass                                                    | Salpeter 2006 <sup>7</sup>     | RCT          | Unclear        | PM without diabetes               | E/EP $\geq 2$ mo <sup>d</sup>  |                                     |
| Abdominal fat                                                     | Salpeter 2006 <sup>7</sup>     | RCT          | 4              | PM without diabetes               | E/EP $\geq 2$ mo <sup>d</sup>  |                                     |
| Waist circumference                                               | Salpeter 2006 <sup>7</sup>     | RCT          | 5              | PM without diabetes               | E/EP $\geq 2$ mo <sup>d</sup>  |                                     |
| Waist/hip ratio                                                   | Kongnyuy 1999 <sup>13</sup>    | RCT          | 2              | PM                                | E/EP $\geq 3$ mo               |                                     |
| Bone mineral density of lumbar spine                              | Wells 2002 <sup>14</sup>       | RCT          | 21             | PM                                | E/EP                           | RCTs with follow-up of $\geq 1$ y   |
| Bone mineral density of lumbar spine                              | Rudic 2011 <sup>15</sup>       | RCT          | 2              | PM with primary biliary cirrhosis | EP                             |                                     |
| Bone mineral density of forearm                                   | Wells 2002 <sup>14</sup>       | RCT          | 14             | PM                                | E/EP                           | RCTs with follow-up of $\geq 1$ y   |
| Bone mineral density of femoral neck                              | Wells 2002 <sup>14</sup>       | RCT          | 9              | PM                                | E/EP                           | RCTs with follow-up of $\geq 1$ y   |
| Bone mineral density of proximal femur                            | Rudic 2011 <sup>15</sup>       | RCT          | 2              | PM with primary biliary cirrhosis | EP                             |                                     |
| <b>Mental or behavioural disorders</b>                            |                                |              |                |                                   |                                |                                     |
| Dementia (probable)                                               | Marjoribanks 2017 <sup>3</sup> | DBRCT        | 2              | PM                                | E/EP $\geq 12$ mo <sup>c</sup> |                                     |
| <b>Mental or behavioural symptoms, signs or clinical findings</b> |                                |              |                |                                   |                                |                                     |
| Depressive symptom                                                | Whedon 2017 <sup>16</sup>      | RCT          | 10             | PPM                               | E/EP <sup>f</sup>              | RCTs with follow-up of $\geq 4$ wks |

**Table B. Characteristics of Included Systematic Reviews and/or Meta-Analyses of Randomized Controlled Trials on Menopausal Hormone Therapy and Multiple Outcomes (continued)**

| Outcome <sup>a</sup>                      | Reference                      | Study Design | No. of Studies | Population | Intervention <sup>b</sup>      | Comments                                                                                                                                                      |
|-------------------------------------------|--------------------------------|--------------|----------------|------------|--------------------------------|---------------------------------------------------------------------------------------------------------------------------------------------------------------|
| <b>Diseases of the nervous system</b>     |                                |              |                |            |                                |                                                                                                                                                               |
| Cerebrovascular disease                   | Sare 2008 <sup>17</sup>        | RCT          | 28             | PPM        | E/EP                           | We additionally included 2 trials from Yang 2013 <sup>18</sup> and Zhu 2016 <sup>1</sup>                                                                      |
| Stroke                                    | Sare 2008 <sup>17</sup>        | RCT          | 19             | PPM        | E/EP                           | We excluded 1 study; additionally included 2 trials from Yang 2013 <sup>18</sup> and Zhu 2016 <sup>1</sup>                                                    |
| Fatal stroke                              | Sare 2008 <sup>17</sup>        | RCT          | 15             | PPM        | E/EP                           | We added 3 trials that were not included for fatal stroke in Sare 2008 review; additionally included 1 trial from Zhu 2016 <sup>1</sup>                       |
| Non-fatal stroke                          | Sare 2008 <sup>17</sup>        | RCT          | 14             | PPM        | E/EP                           | We excluded 1 study; added 4 trials that were not included for non-fatal stroke in Sare 2008 review; additionally included 1 trial from Zhu 2016 <sup>1</sup> |
| Transient ischaemic attack                | Marjoribanks 2017 <sup>3</sup> | DBRCT        | 7              | PM         | E/EP $\geq 12$ mo <sup>c</sup> |                                                                                                                                                               |
| Alzheimer disease                         | O'Brien 2014 <sup>19</sup>     | RCT          | 2              | PM         | E/EP                           |                                                                                                                                                               |
| <b>Diseases of the circulatory system</b> |                                |              |                |            |                                |                                                                                                                                                               |
| Coronary heart disease                    |                                |              |                |            |                                |                                                                                                                                                               |
| Incidence                                 | Sare 2008 <sup>17</sup>        | RCT          | 30             | PPM        | E/EP                           | We additionally included 5 trials from Yang 2013, <sup>18</sup> Zhu 2016, <sup>1</sup> and Marjoribanks 2017 <sup>3</sup>                                     |
| Mortality                                 | Marjoribanks 2017 <sup>3</sup> | DBRCT        | 10             | PM         | E/EP $\geq 12$ mo <sup>c</sup> |                                                                                                                                                               |
| Myocardial infarction                     | Sare 2008 <sup>17</sup>        | RCT          | 24             | PPM        | E/EP                           | We additionally included 5 trials from Yang 2013, <sup>18</sup> Zhu 2016, <sup>1</sup> and Boardman 2015 <sup>20</sup>                                        |
| Fatal myocardial infarction               | Sare 2008 <sup>17</sup>        | RCT          | 13             | PM         | E/EP                           | We additionally included 1 trial from Zhu 2016 <sup>1</sup>                                                                                                   |
| Non-fatal myocardial infarction           | Sare 2008 <sup>17</sup>        | RCT          | 16             | PM         | E/EP                           | We additionally included 1 trial from Zhu 2016 <sup>1</sup>                                                                                                   |
| Angina pectoris                           |                                |              |                |            |                                |                                                                                                                                                               |
| Any angina                                | Boardman 2015 <sup>20</sup>    | RCT          | 5              | PM         | Oral E/EP                      | RCTs with follow-up of $\geq 6$ mo                                                                                                                            |
| Unstable angina                           | Sare 2008 <sup>17</sup>        | RCT          | 5              | PM         | E/EP                           |                                                                                                                                                               |

**Table B. Characteristics of Included Systematic Reviews and/or Meta-Analyses of Randomized Controlled Trials on Menopausal Hormone Therapy and Multiple Outcomes (continued)**

| Outcome <sup>a</sup>                                                  | Reference                      | Study Design | No. of Studies | Population                                | Intervention <sup>b</sup>      | Comments                                                                                                                      |
|-----------------------------------------------------------------------|--------------------------------|--------------|----------------|-------------------------------------------|--------------------------------|-------------------------------------------------------------------------------------------------------------------------------|
| Venous thromboembolism                                                | Sare 2008 <sup>17</sup>        | RCT          | 30             | PPM                                       | E/EP                           | We additionally included 8 trials from Zhu 2016, <sup>1</sup> Canonico 2008, <sup>21</sup> and Marjoribanks 2017 <sup>3</sup> |
| Deep vein thrombosis                                                  | Sare 2008 <sup>17</sup>        | RCT          | 16             | PPM                                       | E/EP                           | We additionally included 3 trials from Zhu 2016 <sup>1</sup> and Canonico 2008 <sup>21</sup>                                  |
| Pulmonary embolism                                                    | Sare 2008 <sup>17</sup>        | RCT          | 12             | PPM                                       | E/EP                           | We additionally included 2 trials from Zhu 2016 <sup>1</sup> and Canonico 2008 <sup>21</sup>                                  |
| <b>Symptoms, signs or clinical findings of the circulatory system</b> |                                |              |                |                                           |                                |                                                                                                                               |
| Cardiac death                                                         | Yang 2013 <sup>18</sup>        | RCT          | 9              | PM                                        | E/EP                           | The review only included trials that were primarily designed to investigate MHT and cardiovascular outcomes                   |
| Coronary revascularization                                            | Boardman 2015 <sup>20</sup>    | RCT          | 6              | PM                                        | Oral E/EP                      | RCTs with follow-up of $\geq 6$ mo                                                                                            |
| Mean blood pressure                                                   | Salpeter 2006 <sup>7</sup>     | RCT          | Unclear        | PM without diabetes                       | E/EP $\geq 2$ mo <sup>d</sup>  |                                                                                                                               |
| Systolic blood pressure                                               | Casanova 2015 <sup>8</sup>     | RCT          | 6              | Healthy PM                                | E/EP <sup>e</sup>              | We excluded 1 study                                                                                                           |
| Diastolic blood pressure                                              | Casanova 2015 <sup>8</sup>     | RCT          | 6              | Healthy PM                                | E/EP <sup>e</sup>              | We excluded 1 study                                                                                                           |
| <b>Diseases of the digestive system</b>                               |                                |              |                |                                           |                                |                                                                                                                               |
| Gallbladder disease requiring surgery                                 | Marjoribanks 2017 <sup>3</sup> | DBRCT        | 5              | PM                                        | E/EP $\geq 12$ mo <sup>c</sup> |                                                                                                                               |
| <b>Diseases of the genitourinary system</b>                           |                                |              |                |                                           |                                |                                                                                                                               |
| Recurrent urinary tract infection                                     | Perrotta 2008 <sup>22</sup>    | RCT          | 3              | PM with recurrent urinary tract infection | Oral/vaginal E                 | We excluded 3 studies                                                                                                         |
| Endometrial hyperplasia                                               | Furness 2012 <sup>23</sup>     | RCT          | 17             | PM                                        | Oral E/EP $\geq 12$ mo         |                                                                                                                               |
| Vaginal atrophy                                                       | Lethaby 2016 <sup>24</sup>     | RCT          | 5              | PM                                        | Vaginal E $\geq 3$ mo          |                                                                                                                               |

**Table B. Characteristics of Included Systematic Reviews and/or Meta-Analyses of Randomized Controlled Trials on Menopausal Hormone Therapy and Multiple Outcomes (continued)**

| Outcome <sup>a</sup>                                                      | Reference                      | Study Design | No. of Studies | Population                        | Intervention <sup>b</sup> | Comments                                                                                        |
|---------------------------------------------------------------------------|--------------------------------|--------------|----------------|-----------------------------------|---------------------------|-------------------------------------------------------------------------------------------------|
| Irregular vaginal bleeding                                                | Lethaby 1999 <sup>25</sup>     | RCT          | 9              | PM                                | E/EP ≥6 mo                |                                                                                                 |
| <b>Symptoms, signs or clinical findings of the genitourinary system</b>   |                                |              |                |                                   |                           |                                                                                                 |
| Vasomotor symptom                                                         | Maclennan 2004 <sup>26</sup>   | DBRCT        | 9              | PPM                               | Oral E/EP ≥3 mo           |                                                                                                 |
| Vasomotor symptom severity                                                | Maclennan 2004 <sup>26</sup>   | DBRCT        | 7              | PPM                               | Oral E/EP ≥3 mo           |                                                                                                 |
| Urinary incontinence                                                      | Cody 2012 <sup>27</sup>        | RCT          | 13             | PM with urinary incontinence      | E/EP                      |                                                                                                 |
| <b>Injury, poisoning or certain other consequences of external causes</b> |                                |              |                |                                   |                           |                                                                                                 |
| All fracture                                                              | Zhu 2016 <sup>1</sup>          | RCT          | 30             | PM                                | E/EP                      | We additionally included 2 trials from Marjoribanks 2017 <sup>3</sup>                           |
| Vertebral fracture                                                        | Torgerson 2001 <sup>28</sup>   | RCT          | 16             | PM                                | E/EP ≥12 mo               | We additionally included 3 trials from Zhu 2016 <sup>1</sup> and Marjoribanks 2017 <sup>3</sup> |
| Nonvertebral fracture                                                     | Torgerson 2001 <sup>29</sup>   | RCT          | 26             | PM                                | E/EP ≥12 mo               | We additionally included 4 trials from Zhu 2016 <sup>1</sup>                                    |
| Hip fracture                                                              | Marjoribanks 2017 <sup>3</sup> | DBRCT        | 6              | PM                                | E/EP ≥12 mo <sup>c</sup>  |                                                                                                 |
| <b>Functioning assessment</b>                                             |                                |              |                |                                   |                           |                                                                                                 |
| Cognitive function                                                        | Lethaby 2008 <sup>30</sup>     | DBRCT        | 16             | Healthy PM                        | E/EP ≥2 wks               |                                                                                                 |
| Cognitive function                                                        | Marjoribanks 2017 <sup>3</sup> | DBRCT        | 5              | PPM without major health problems | E/EP ≥12 mo <sup>c</sup>  |                                                                                                 |
| Cognitive function                                                        | Hogervorst 2009 <sup>31</sup>  | DBRCT        | 7              | PM with dementia                  | E/EP ≥2 wks               |                                                                                                 |
| Sleep quality                                                             | Cintron 2017 <sup>32</sup>     | RCT          | 7              | PM                                | E/EP ≥8 wks               | The review only searched for studies published between 2002 and 2015                            |
| Sexual function                                                           | Nastri 2013 <sup>33</sup>      | RCT          | 10             | PM                                | E/EP                      | RCTs with follow-up of ≥1 mo                                                                    |
| Skeletal muscle strength                                                  | Greising 2009 <sup>34</sup>    | RCT          | 5              | PM                                | E/EP                      | The review combined observational studies with RCTs; we excluded 18 studies                     |

**Table B. Characteristics of Included Systematic Reviews and/or Meta-Analyses of Randomized Controlled Trials on Menopausal Hormone Therapy and Multiple Outcomes (continued)**

| Outcome <sup>a</sup>                    | Reference                   | Study Design | No. of Studies | Population | Intervention <sup>b</sup> | Comments                                                                                                                                                      |
|-----------------------------------------|-----------------------------|--------------|----------------|------------|---------------------------|---------------------------------------------------------------------------------------------------------------------------------------------------------------|
| <b>Others, not elsewhere classified</b> |                             |              |                |            |                           |                                                                                                                                                               |
| All-cause mortality                     | Benkhadra 2015 <sup>4</sup> | RCT          | 38             | PM         | E/EP                      | RCTs with follow-up of $\geq 6$ mo; we excluded 2 studies; additionally included 9 trials from Salpeter 2004 <sup>35</sup> and Marjoribanks 2017 <sup>3</sup> |
| <b>Cardiovascular disease</b>           |                             |              |                |            |                           |                                                                                                                                                               |
| Incidence                               | Sare 2008 <sup>17</sup>     | RCT          | 36             | PPM        | E/EP                      | We additionally included 5 trials from Yang 2013 <sup>18</sup> and Zhu 2016 <sup>1</sup>                                                                      |
| Mortality                               | Salpeter 2004 <sup>35</sup> | RCT          | 18             | PM         | Transdermal or oral E/EP  | RCTs with follow-up of $\geq 6$ mo; we excluded 1 study; additionally included 4 trials from Benkhadra 2015 <sup>4</sup>                                      |

Abbreviations: DBRCT, double-blinded randomized controlled trial; E, estrogen alone; EP, estrogen plus progestin; HDL, high-density lipoprotein; LDL, low-density lipoprotein; MHT, menopausal hormone therapy; PAI-1, plasminogen activator inhibitor-1; PM, postmenopausal women; PPM, peri-/post-menopausal women; RCT, randomized controlled trial; WHI, Women's Health Initiative.

<sup>a</sup> Incidence unless otherwise indicated.

<sup>b</sup> The comparator group is placebo or no treatment, unless otherwise indicated.

<sup>c</sup> Estrogen with/without progestin (oral/transdermal/subcutaneous/intranasal) for at least 12 months.

<sup>d</sup> Conjugated equine estrogen, oral esterified estrogen or transdermal estrogen, alone or in combination with progestin for at least 2 months.

<sup>e</sup> Low-dose estrogen (0.3 mg or less conjugated equine estrogen, 1 mg or less estradiol valerate or oral  $17\beta$ -estradiol, 100  $\mu\text{g}$  or less percutaneous  $17\beta$ -estradiol gel, <50  $\mu\text{g}$   $17\beta$ -estradiol patches, or <300  $\mu\text{g}$  intranasal estradiol) with/without progestin.

<sup>f</sup> Bioidentical estrogen ( $17\beta$ -estradiol, estradiol acetate, estradiol hemihydrates, estriol, estrone, and estropipate, administered orally, transdermally, or vaginally) with/without progestin.

**Table C. Characteristics of Included Systematic Reviews and/or Meta-Analyses of Observational Epidemiological Studies on Menopausal Hormone Therapy and Multiple Outcomes**

| Outcome <sup>a</sup> | Reference                          | Study Design | No. of Studies | Population          | Exposure <sup>b</sup>    | Comments                                                                                                                                                                                                                   |
|----------------------|------------------------------------|--------------|----------------|---------------------|--------------------------|----------------------------------------------------------------------------------------------------------------------------------------------------------------------------------------------------------------------------|
| <b>Neoplasms</b>     |                                    |              |                |                     |                          |                                                                                                                                                                                                                            |
| Cutaneous melanoma   | Gandini 2011 <sup>36</sup>         | CO/CC        | 9              | PPM                 | Any MHT                  | We excluded 2 studies                                                                                                                                                                                                      |
| Head and neck cancer | McCarthy 2017 <sup>37</sup>        | CO/CC        | 3              | PPM                 | Any MHT                  | No meta-analysis conducted                                                                                                                                                                                                 |
| Glioma               | Qi 2013 <sup>38</sup>              | CO/CC        | 10             | PPM                 | Any MHT                  | The review only included CCs; we excluded 2 studies; added 4 COs that were not included for glioma in Qi 2013 review; additionally included 2 CCs from Benson 2015 <sup>39</sup>                                           |
| Meningioma           | Qi 2013 <sup>40</sup>              | CO/CC        | 14             | PPM                 | Any MHT                  | We excluded 1 CS; additionally included 1 CC from Benson 2015 <sup>39</sup>                                                                                                                                                |
| Thyroid cancer       | Cao 2015 <sup>41</sup>             | CO/CC        | 12             | PPM                 | Any MHT                  | We excluded 1 study                                                                                                                                                                                                        |
| Esophageal cancer    | Zhu 2017 <sup>42</sup>             | CO/CC        | 5              | PPM                 | Any MHT                  | We excluded 1 study                                                                                                                                                                                                        |
| Gastric cancer       | Camargo 2012 <sup>43</sup>         | CO/CC        | 6              | PPM                 | Any MHT                  | We excluded 1 study                                                                                                                                                                                                        |
| Colorectal cancer    | Green 2012 <sup>44</sup>           | CO/CC        | 27             | PPM                 | Any MHT                  | We excluded 2 studies                                                                                                                                                                                                      |
| Pancreatic cancer    | Tang 2015 <sup>45</sup>            | CO/CC        | 11             | PPM                 | Any MHT                  | We excluded 4 studies                                                                                                                                                                                                      |
| Primary liver cancer | Zhong 2016 <sup>46</sup>           | CO/CC        | 5              | PM                  | Any MHT                  | We excluded 2 studies                                                                                                                                                                                                      |
| <b>Lung cancer</b>   |                                    |              |                |                     |                          |                                                                                                                                                                                                                            |
| Incidence            | Yao 2013 <sup>47</sup>             | CO/CC        | 20             | PPM                 | Any MHT                  | The review pooled observational studies with RCTs using unadjusted effect estimates; we excluded 6 studies; additionally included 3 COs from Bae 2015 <sup>48</sup>                                                        |
| Overall survival     | Li 2017 <sup>49</sup>              | CO           | 5              | PM with lung cancer | Any MHT before diagnosis | The review pooled lung cancer mortality and lung cancer-specific survival with overall survival; we excluded 3 studies                                                                                                     |
| <b>Breast cancer</b> |                                    |              |                |                     |                          |                                                                                                                                                                                                                            |
| Incidence            | Anothaisintawee 2013 <sup>50</sup> | CO/CC        | 86             | PPM                 | Any MHT                  | The review combined unadjusted effect estimates; we excluded 9 studies; added 7 studies that were not included for incidence in Anothaisintawee 2013 review; additionally included 10 studies from Wang 2017 <sup>51</sup> |



**Table C. Characteristics of Included Systematic Reviews and/or Meta-Analyses of Observational Epidemiological Studies on Menopausal Hormone Therapy and Multiple Outcomes (continued)**

| Outcome <sup>a</sup> | Reference                  | Study Design | No. of Studies | Population                  | Exposure <sup>b</sup>          | Comments                                                                                                                                                                                                             |
|----------------------|----------------------------|--------------|----------------|-----------------------------|--------------------------------|----------------------------------------------------------------------------------------------------------------------------------------------------------------------------------------------------------------------|
| Breast cancer        |                            |              |                |                             |                                |                                                                                                                                                                                                                      |
| Recurrence           | Col 2005 <sup>5</sup>      | CO           | 7              | PPM with breast cancer      | Any MHT after diagnosis        |                                                                                                                                                                                                                      |
| Mortality            | Yu 2017 <sup>52</sup>      | CO/CC        | 11             | PPM                         | Any MHT                        | The review pooled breast cancer survival with breast cancer mortality; we excluded 2 studies                                                                                                                         |
| Specific survival    | Yu 2017 <sup>52</sup>      | CO           | 21             | PPM with breast cancer      | Any MHT before/after diagnosis | The review pooled breast cancer-specific survival with breast cancer mortality; we added 2 COs that were not included for specific survival in Yu 2017 review; additionally included 1 CO from Col 2005 <sup>5</sup> |
| Overall survival     | Yu 2017 <sup>52</sup>      | CO           | 29             | PPM with breast cancer      | Any MHT before/after diagnosis | We excluded 1 study; added 2 COs that were not included for overall survival in Yu 2017 review; additionally included 1 CO from Col 2005 <sup>5</sup>                                                                |
| Endometrial cancer   |                            |              |                |                             |                                |                                                                                                                                                                                                                      |
| Incidence            | Grady 1995 <sup>53</sup>   | CO/CC        | 32             | PPM                         | Any MHT                        | We excluded 16 studies; additionally included 11 COs from Sjogren 2016 <sup>54</sup>                                                                                                                                 |
| Recurrence           | Shim 2014 <sup>55</sup>    | CO           | 4              | PPM with endometrial cancer | Any MHT after diagnosis        | The review combined cohort studies with RCTs; included only patients who had received surgical treatment for endometrial cancer; the included studies did not report adjusted effect estimates                       |
| Mortality            | Grady 1995 <sup>53</sup>   | CO           | 3              | PPM                         | Estrogen                       |                                                                                                                                                                                                                      |
| Ovarian cancer       |                            |              |                |                             |                                |                                                                                                                                                                                                                      |
| Incidence            | Greiser 2007 <sup>56</sup> | CO/CC        | 38             | PPM                         | Any MHT                        | We excluded 5 studies; additionally included 6 COs from Zhou 2008 <sup>57</sup> and Shi 2016 <sup>58</sup>                                                                                                           |
| Recurrence           | Li 2015 <sup>6</sup>       | CO           | 3              | PPM with ovarian cancer     | Any MHT after diagnosis        | The review included only patients who had received surgical treatment for ovarian cancer; we added 1 CO that was not included for recurrence in Li 2015 review                                                       |
| Overall survival     | Li 2015 <sup>6</sup>       | CO           | 3              | PPM with ovarian cancer     | Any MHT after diagnosis        | The review included only patients who had received surgical treatment for ovarian cancer; we excluded 1 study                                                                                                        |

**Table C. Characteristics of Included Systematic Reviews and/or Meta-Analyses of Observational Epidemiological Studies on Menopausal Hormone Therapy and Multiple Outcomes (continued)**

| Outcome <sup>a</sup>                                | Reference                           | Study Design | No. of Studies | Population | Exposure <sup>b</sup> | Comments                                                                                                                                              |
|-----------------------------------------------------|-------------------------------------|--------------|----------------|------------|-----------------------|-------------------------------------------------------------------------------------------------------------------------------------------------------|
| <b>Diseases of the immune system</b>                |                                     |              |                |            |                       |                                                                                                                                                       |
| Systemic lupus erythematosus                        | Rojas-Villarraga 2014 <sup>59</sup> | CO/CC        | 3              | PPM        | Any MHT               | We excluded 1 study                                                                                                                                   |
| <b>Endocrine, nutritional or metabolic diseases</b> |                                     |              |                |            |                       |                                                                                                                                                       |
| Diabetes mellitus                                   | Xu 2014 <sup>10</sup>               | CO           | 2              | PM         | Any MHT               | We excluded 6 CSs                                                                                                                                     |
| <b>Mental or behavioural disorders</b>              |                                     |              |                |            |                       |                                                                                                                                                       |
| Dementia                                            | O'Brien 2014 <sup>19</sup>          | CO           | 5              | PM         | Any MHT               |                                                                                                                                                       |
| <b>Diseases of the nervous system</b>               |                                     |              |                |            |                       |                                                                                                                                                       |
| Parkinson disease                                   | Wang 2015 <sup>60</sup>             | CO/CC        | 9              | PM         | Any MHT               | We excluded 5 studies                                                                                                                                 |
| Alzheimer disease                                   | LeBlanc 2001 <sup>61</sup>          | CO/CC        | 14             | Healthy PM | Any MHT               | We excluded 7 studies; additionally included 8 studies from O'Brien 2014 <sup>19</sup> and Hogervorst 2000 <sup>62</sup>                              |
| <b>Diseases of the visual system</b>                |                                     |              |                |            |                       |                                                                                                                                                       |
| Cataract                                            | Lai 2013 <sup>63</sup>              | CO/CC        | 6              | PM         | Any MHT               | We excluded 3 studies                                                                                                                                 |
| <b>Diseases of the circulatory system</b>           |                                     |              |                |            |                       |                                                                                                                                                       |
| Coronary heart disease                              |                                     |              |                |            |                       |                                                                                                                                                       |
| Incidence                                           | Humphrey 2002 <sup>64</sup>         | CO/CC        | 12             | PPM        | Any MHT               | The review only included high-quality studies                                                                                                         |
| Mortality                                           | Humphrey 2002 <sup>64</sup>         | CO/CC        | 5              | PM         | Any MHT               | The review only included high-quality studies                                                                                                         |
| Venous thromboembolism                              | Canonico 2008 <sup>21</sup>         | CO/CC        | 8              | PPM        | Any MHT               | The review only included high-quality studies                                                                                                         |
| Deep vein thrombosis                                | Canonico 2008 <sup>21</sup>         | CC           | 3              | PM         | Any MHT               | The review only included high-quality studies                                                                                                         |
| Pulmonary embolism                                  | Canonico 2008 <sup>21</sup>         | CO/CC        | 3              | PM         | Any MHT               | The review only included high-quality studies                                                                                                         |
| <b>Diseases of the respiratory system</b>           |                                     |              |                |            |                       |                                                                                                                                                       |
| Asthma                                              | McCleary 2018 <sup>65</sup>         | CO           | 5              | PM         | Any MHT               | We excluded 3 studies                                                                                                                                 |
| <b>Diseases of the digestive system</b>             |                                     |              |                |            |                       |                                                                                                                                                       |
| Cholelithiasis                                      | Wang 2017 <sup>66</sup>             | CO/CC        | 12             | PPM        | Any MHT               | The review combined observational studies with RCTs; we excluded 4 studies; added 2 COs that were not included for cholelithiasis in Wang 2017 review |

**Table C. Characteristics of Included Systematic Reviews and/or Meta-Analyses of Observational Epidemiological Studies on Menopausal Hormone Therapy and Multiple Outcomes (continued)**

| Outcome <sup>a</sup>                                               | Reference                   | Study Design     | No. of Studies | Population | Exposure <sup>b</sup> | Comments                                                                                                                 |
|--------------------------------------------------------------------|-----------------------------|------------------|----------------|------------|-----------------------|--------------------------------------------------------------------------------------------------------------------------|
| <b>Diseases of the musculoskeletal system or connective tissue</b> |                             |                  |                |            |                       |                                                                                                                          |
| Osteoarthritis                                                     | de Klerk 2009 <sup>67</sup> | RCT/CO<br>/CC/CS | 19             | PPM        | Any MHT               | No meta-analysis conducted                                                                                               |
| <b>Others, not elsewhere classified</b>                            |                             |                  |                |            |                       |                                                                                                                          |
| All-cause mortality                                                | Salpeter 2009 <sup>68</sup> | CO/CC            | 8              | PPM        | Any MHT               |                                                                                                                          |
| <b>Cardiovascular disease</b>                                      |                             |                  |                |            |                       |                                                                                                                          |
| Incidence                                                          | Humphrey 2002 <sup>64</sup> | CO/CC            | 4              | PPM        | Any MHT               | The review only included high-quality studies; we added 1 CO that was not included for incidence in Humphrey 2002 review |
| Mortality                                                          | Humphrey 2002 <sup>64</sup> | CO               | 7              | PPM        | Any MHT               | The review only included high-quality studies; we excluded 1 study                                                       |

Abbreviations: CC, case-control study; CO, cohort study; CS, cross-sectional study; MHT, menopausal hormone therapy; PM, postmenopausal women; PPM, peri-/post-menopausal women; RCT, randomized controlled trial.

<sup>a</sup> Incidence unless otherwise indicated.

<sup>b</sup> "Any MHT": any type of menopausal hormone therapy, such as estrogen alone, estrogen plus progestin, tibolone, selective estrogen receptor modulators, or unspecified; the comparator group is never use of hormone therapy, unless otherwise indicated.

**Table D. Quality Assessment of Included Systematic Reviews and/or Meta-Analyses of Randomized Controlled Trials on Menopausal Hormone Therapy and Multiple Outcomes**

| Outcome <sup>a</sup>                                                                             | Reference                      | AMSTAR 2 Items <sup>b</sup> |    |   |    |   |   |   |    |    |    |    |    |    |    |    |    |
|--------------------------------------------------------------------------------------------------|--------------------------------|-----------------------------|----|---|----|---|---|---|----|----|----|----|----|----|----|----|----|
|                                                                                                  |                                | 1                           | 2  | 3 | 4  | 5 | 6 | 7 | 8  | 9  | 10 | 11 | 12 | 13 | 14 | 15 | 16 |
| <b>Neoplasms</b>                                                                                 |                                |                             |    |   |    |   |   |   |    |    |    |    |    |    |    |    |    |
| All cancer                                                                                       |                                |                             |    |   |    |   |   |   |    |    |    |    |    |    |    |    |    |
| Incidence                                                                                        | Zhu 2016 <sup>1</sup>          | Y                           | N  | Y | PY | Y | Y | N | PY | N  | N  | N  | N  | N  | Y  | N  | Y  |
| Mortality                                                                                        | Marjoribanks 2017 <sup>3</sup> | Y                           | Y  | Y | PY | Y | Y | Y | Y  | Y  | Y  | Y  | Y  | Y  | Y  | Y  | Y  |
| Colorectal cancer                                                                                |                                |                             |    |   |    |   |   |   |    |    |    |    |    |    |    |    |    |
| Incidence                                                                                        | Marjoribanks 2017 <sup>3</sup> | Y                           | Y  | Y | PY | Y | Y | Y | Y  | Y  | Y  | Y  | Y  | Y  | Y  | Y  | Y  |
| Mortality                                                                                        | Marjoribanks 2017 <sup>3</sup> | Y                           | Y  | Y | PY | Y | Y | Y | Y  | Y  | Y  | Y  | Y  | Y  | Y  | Y  | Y  |
| Lung cancer                                                                                      |                                |                             |    |   |    |   |   |   |    |    |    |    |    |    |    |    |    |
| Incidence                                                                                        | Marjoribanks 2017 <sup>3</sup> | Y                           | Y  | Y | PY | Y | Y | Y | Y  | Y  | Y  | Y  | Y  | Y  | Y  | Y  | Y  |
| Mortality                                                                                        | Marjoribanks 2017 <sup>3</sup> | Y                           | Y  | Y | PY | Y | Y | Y | Y  | Y  | Y  | Y  | Y  | Y  | Y  | Y  | Y  |
| Breast cancer                                                                                    |                                |                             |    |   |    |   |   |   |    |    |    |    |    |    |    |    |    |
| Incidence                                                                                        | Marjoribanks 2017 <sup>3</sup> | Y                           | Y  | Y | PY | Y | Y | Y | Y  | Y  | Y  | Y  | Y  | Y  | Y  | Y  | Y  |
| Recurrence                                                                                       | Col 2005 <sup>5</sup>          | Y                           | N  | Y | N  | N | Y | Y | PY | N  | N  | N  | N  | Y  | Y  | N  | Y  |
| Mortality                                                                                        | Benkhadra 2015 <sup>4</sup>    | Y                           | PY | Y | PY | Y | Y | N | Y  | Y  | Y  | N  | N  | Y  | N  | N  | Y  |
| Endometrial cancer                                                                               | Marjoribanks 2017 <sup>3</sup> | Y                           | Y  | Y | PY | Y | Y | Y | Y  | Y  | Y  | Y  | Y  | Y  | Y  | Y  | Y  |
| Ovarian cancer                                                                                   |                                |                             |    |   |    |   |   |   |    |    |    |    |    |    |    |    |    |
| Incidence                                                                                        | Marjoribanks 2017 <sup>3</sup> | Y                           | Y  | Y | PY | Y | Y | Y | Y  | Y  | Y  | Y  | Y  | Y  | Y  | Y  | Y  |
| Overall survival                                                                                 | Li 2015 <sup>6</sup>           | Y                           | PY | Y | PY | Y | Y | N | PY | PY | N  | N  | Y  | Y  | Y  | N  | Y  |
| <b>Symptoms, signs or clinical findings of blood, blood-forming organs, or the immune system</b> |                                |                             |    |   |    |   |   |   |    |    |    |    |    |    |    |    |    |
| C-reactive protein                                                                               | Salpeter 2006 <sup>7</sup>     | Y                           | N  | Y | N  | N | N | N | PY | PY | N  | N  | Y  | N  | N  | N  | Y  |
| C-reactive protein                                                                               | Casanova 2015 <sup>8</sup>     | Y                           | PY | Y | N  | Y | Y | N | PY | Y  | N  | N  | N  | N  | Y  | N  | Y  |
| Immunological factors                                                                            | Abdi 2016 <sup>9</sup>         | N                           | N  | N | N  | N | N | N | N  | N  | N  | NM | NM | N  | N  | NM | Y  |
| PAI-1 antigen                                                                                    | Salpeter 2006 <sup>7</sup>     | Y                           | N  | Y | N  | N | N | N | PY | PY | N  | N  | Y  | N  | N  | N  | Y  |
| Protein C                                                                                        | Salpeter 2006 <sup>7</sup>     | Y                           | N  | Y | N  | N | N | N | PY | PY | N  | N  | Y  | N  | Y  | N  | Y  |
| Protein S                                                                                        | Salpeter 2006 <sup>7</sup>     | Y                           | N  | Y | N  | N | N | N | PY | PY | N  | N  | Y  | N  | N  | N  | Y  |
| Fibrinogen                                                                                       | Salpeter 2006 <sup>7</sup>     | Y                           | N  | Y | N  | N | N | N | PY | PY | N  | N  | Y  | N  | Y  | N  | Y  |
| E-selectin                                                                                       | Salpeter 2006 <sup>7</sup>     | Y                           | N  | Y | N  | N | N | N | PY | PY | N  | N  | Y  | N  | Y  | N  | Y  |

**Table D. Quality Assessment of Included Systematic Reviews and/or Meta-Analyses of Randomized Controlled Trials on Menopausal Hormone Therapy and Multiple Outcomes (continued)**

| Outcome <sup>a</sup>                                                                        | Reference                     | AMSTAR 2 Items <sup>b</sup> |    |   |    |   |   |   |    |    |    |    |    |    |    |    |    |
|---------------------------------------------------------------------------------------------|-------------------------------|-----------------------------|----|---|----|---|---|---|----|----|----|----|----|----|----|----|----|
|                                                                                             |                               | 1                           | 2  | 3 | 4  | 5 | 6 | 7 | 8  | 9  | 10 | 11 | 12 | 13 | 14 | 15 | 16 |
| <b>Endocrine, nutritional or metabolic diseases</b>                                         |                               |                             |    |   |    |   |   |   |    |    |    |    |    |    |    |    |    |
| Diabetes mellitus                                                                           | Salpeter 2006 <sup>7</sup>    | Y                           | N  | Y | N  | N | N | N | PY | PY | N  | N  | Y  | N  | Y  | N  | Y  |
| <b>Symptoms, signs or clinical findings of endocrine, nutritional or metabolic diseases</b> |                               |                             |    |   |    |   |   |   |    |    |    |    |    |    |    |    |    |
| Fasting glucose <sup>c</sup>                                                                | Salpeter 2006 <sup>7</sup>    | Y                           | N  | Y | N  | N | N | N | PY | PY | N  | N  | Y  | N  | Y  | N  | Y  |
| Fasting glucose                                                                             | Xu 2014 <sup>10</sup>         | Y                           | N  | Y | PY | Y | Y | N | Y  | N  | N  | N  | N  | N  | N  | N  | Y  |
| Fasting glucose <sup>d</sup>                                                                | Salpeter 2006 <sup>7</sup>    | Y                           | N  | Y | N  | N | N | N | PY | PY | N  | N  | Y  | N  | Y  | N  | Y  |
| Fasting insulin <sup>c</sup>                                                                | Salpeter 2006 <sup>7</sup>    | Y                           | N  | Y | N  | N | N | N | PY | PY | N  | N  | Y  | N  | Y  | N  | Y  |
| Fasting insulin <sup>d</sup>                                                                | Salpeter 2006 <sup>7</sup>    | Y                           | N  | Y | N  | N | N | N | PY | PY | N  | N  | Y  | N  | Y  | N  | Y  |
| HbA1c                                                                                       | Xu 2014 <sup>10</sup>         | Y                           | N  | Y | PY | Y | Y | N | Y  | N  | N  | N  | N  | N  | N  | N  | Y  |
| Insulin resistance <sup>c</sup>                                                             | Salpeter 2006 <sup>7</sup>    | Y                           | N  | Y | N  | N | N | N | PY | PY | N  | N  | Y  | N  | Y  | N  | Y  |
| Insulin resistance <sup>d</sup>                                                             | Salpeter 2006 <sup>7</sup>    | Y                           | N  | Y | N  | N | N | N | PY | PY | N  | N  | Y  | N  | Y  | N  | Y  |
| Total cholesterol                                                                           | Casanova 2015 <sup>8</sup>    | Y                           | PY | Y | N  | Y | Y | N | PY | Y  | N  | Y  | N  | N  | N  | N  | Y  |
| Total cholesterol                                                                           | Ramesh 2016 <sup>11</sup>     | Y                           | Y  | Y | Y  | Y | Y | N | Y  | PY | N  | Y  | N  | N  | Y  | Y  | Y  |
| Total cholesterol                                                                           | Xu 2014 <sup>10</sup>         | Y                           | N  | Y | PY | Y | Y | N | Y  | N  | N  | N  | N  | N  | Y  | N  | Y  |
| HDL cholesterol                                                                             | Casanova 2015 <sup>8</sup>    | Y                           | PY | Y | N  | Y | Y | N | PY | Y  | N  | Y  | N  | N  | Y  | N  | Y  |
| HDL cholesterol                                                                             | Ramesh 2016 <sup>11</sup>     | Y                           | Y  | Y | Y  | Y | Y | N | Y  | PY | N  | Y  | N  | N  | Y  | Y  | Y  |
| HDL cholesterol                                                                             | Xu 2014 <sup>10</sup>         | Y                           | N  | Y | PY | Y | Y | N | Y  | N  | N  | N  | N  | N  | N  | N  | Y  |
| HDL cholesterol                                                                             | Salpeter 2006 <sup>7</sup>    | Y                           | N  | Y | N  | N | N | N | PY | PY | N  | N  | Y  | N  | Y  | N  | Y  |
| LDL cholesterol                                                                             | Casanova 2015 <sup>8</sup>    | Y                           | PY | Y | N  | Y | Y | N | PY | Y  | N  | Y  | N  | N  | Y  | N  | Y  |
| LDL cholesterol                                                                             | Ramesh 2016 <sup>11</sup>     | Y                           | Y  | Y | Y  | Y | Y | N | Y  | PY | N  | Y  | N  | N  | Y  | Y  | Y  |
| LDL cholesterol                                                                             | Xu 2014 <sup>10</sup>         | Y                           | N  | Y | PY | Y | Y | N | Y  | N  | N  | N  | N  | N  | N  | N  | Y  |
| LDL cholesterol                                                                             | Salpeter 2006 <sup>7</sup>    | Y                           | N  | Y | N  | N | N | N | PY | PY | N  | N  | Y  | N  | Y  | N  | Y  |
| LDL/HDL ratio                                                                               | Salpeter 2006 <sup>7</sup>    | Y                           | N  | Y | N  | N | N | N | PY | PY | N  | N  | Y  | N  | N  | N  | Y  |
| Lipoprotein (a)                                                                             | Anagnostis 2017 <sup>12</sup> | Y                           | N  | Y | N  | Y | Y | N | PY | N  | N  | Y  | N  | N  | N  | N  | Y  |
| Triglyceride                                                                                | Casanova 2015 <sup>8</sup>    | Y                           | PY | Y | N  | Y | Y | N | PY | Y  | N  | Y  | N  | N  | N  | N  | Y  |
| Triglyceride                                                                                | Ramesh 2016 <sup>11</sup>     | Y                           | Y  | Y | Y  | Y | Y | N | Y  | PY | N  | Y  | N  | N  | Y  | Y  | Y  |
| Triglyceride                                                                                | Xu 2014 <sup>10</sup>         | Y                           | N  | Y | PY | Y | Y | N | Y  | N  | N  | N  | N  | N  | Y  | N  | Y  |
| Triglyceride                                                                                | Salpeter 2006 <sup>7</sup>    | Y                           | N  | Y | N  | N | N | N | PY | PY | N  | N  | Y  | N  | N  | N  | Y  |



**Table D. Quality Assessment of Included Systematic Reviews and/or Meta-Analyses of Randomized Controlled Trials on Menopausal Hormone Therapy and Multiple Outcomes (continued)**

| Outcome <sup>a</sup>                                                      | Reference                      | AMSTAR 2 Items <sup>b</sup> |    |   |    |   |   |   |    |    |    |    |    |    |    |    |    |
|---------------------------------------------------------------------------|--------------------------------|-----------------------------|----|---|----|---|---|---|----|----|----|----|----|----|----|----|----|
|                                                                           |                                | 1                           | 2  | 3 | 4  | 5 | 6 | 7 | 8  | 9  | 10 | 11 | 12 | 13 | 14 | 15 | 16 |
| MI                                                                        | Sare 2008 <sup>17</sup>        | Y                           | N  | Y | N  | N | Y | N | PY | PY | N  | Y  | Y  | N  | Y  | N  | Y  |
| Fatal MI                                                                  | Sare 2008 <sup>17</sup>        | Y                           | N  | Y | N  | N | Y | N | PY | PY | N  | Y  | Y  | N  | Y  | N  | Y  |
| Non-fatal MI                                                              | Sare 2008 <sup>17</sup>        | Y                           | N  | Y | N  | N | Y | N | PY | PY | N  | Y  | Y  | N  | Y  | N  | Y  |
| Angina pectoris                                                           |                                |                             |    |   |    |   |   |   |    |    |    |    |    |    |    |    |    |
| Any angina                                                                | Boardman 2015 <sup>20</sup>    | Y                           | Y  | Y | PY | Y | Y | Y | Y  | Y  | Y  | Y  | N  | Y  | Y  | Y  | Y  |
| Unstable angina                                                           | Sare 2008 <sup>17</sup>        | Y                           | N  | Y | N  | N | Y | N | PY | PY | N  | Y  | Y  | N  | Y  | N  | Y  |
| VTE                                                                       | Sare 2008 <sup>17</sup>        | Y                           | N  | Y | N  | N | Y | N | PY | PY | N  | Y  | Y  | N  | Y  | N  | Y  |
| Deep vein thrombosis                                                      | Sare 2008 <sup>17</sup>        | Y                           | N  | Y | N  | N | Y | N | PY | PY | N  | Y  | Y  | N  | Y  | N  | Y  |
| Pulmonary embolism                                                        | Sare 2008 <sup>17</sup>        | Y                           | N  | Y | N  | N | Y | N | PY | PY | N  | Y  | Y  | N  | Y  | N  | Y  |
| <b>Symptoms, signs or clinical findings of the circulatory system</b>     |                                |                             |    |   |    |   |   |   |    |    |    |    |    |    |    |    |    |
| Cardiac death                                                             | Yang 2013 <sup>18</sup>        | Y                           | N  | Y | N  | Y | Y | N | Y  | PY | N  | Y  | N  | N  | Y  | N  | Y  |
| CR                                                                        | Boardman 2015 <sup>20</sup>    | Y                           | Y  | Y | PY | Y | Y | Y | Y  | Y  | Y  | Y  | N  | Y  | Y  | Y  | Y  |
| Mean blood pressure                                                       | Salpeter 2006 <sup>7</sup>     | Y                           | N  | Y | N  | N | N | N | PY | PY | N  | N  | Y  | N  | N  | N  | Y  |
| Systolic blood pressure                                                   | Casanova 2015 <sup>8</sup>     | Y                           | PY | Y | N  | Y | Y | N | PY | Y  | N  | Y  | N  | N  | N  | N  | Y  |
| Diastolic blood pressure                                                  | Casanova 2015 <sup>8</sup>     | Y                           | PY | Y | N  | Y | Y | N | PY | Y  | N  | Y  | N  | N  | Y  | N  | Y  |
| <b>Diseases of the digestive system</b>                                   |                                |                             |    |   |    |   |   |   |    |    |    |    |    |    |    |    |    |
| Gallbladder disease <sup>9</sup>                                          | Marjoribanks 2017 <sup>3</sup> | Y                           | Y  | Y | PY | Y | Y | Y | Y  | Y  | Y  | Y  | Y  | Y  | Y  | Y  | Y  |
| <b>Diseases of the genitourinary system</b>                               |                                |                             |    |   |    |   |   |   |    |    |    |    |    |    |    |    |    |
| RUTI                                                                      | Perrotta 2008 <sup>22</sup>    | Y                           | Y  | Y | PY | Y | Y | Y | Y  | PY | N  | Y  | N  | N  | Y  | N  | Y  |
| Endometrial hyperplasia                                                   | Furness 2012 <sup>23</sup>     | Y                           | Y  | Y | PY | Y | Y | Y | Y  | Y  | Y  | N  | Y  | Y  | Y  | Y  | Y  |
| Vaginal atrophy                                                           | Lethaby 2016 <sup>24</sup>     | Y                           | Y  | Y | Y  | Y | Y | Y | Y  | Y  | Y  | Y  | Y  | Y  | Y  | Y  | Y  |
| Irregular vaginal bleeding                                                | Lethaby 1999 <sup>25</sup>     | Y                           | Y  | Y | PY | N | Y | Y | Y  | PY | Y  | N  | Y  | Y  | Y  | N  | Y  |
| <b>Symptoms, signs or clinical findings of the genitourinary system</b>   |                                |                             |    |   |    |   |   |   |    |    |    |    |    |    |    |    |    |
| VMS                                                                       | Maclennan 2004 <sup>26</sup>   | Y                           | Y  | Y | Y  | N | Y | Y | Y  | PY | Y  | Y  | Y  | Y  | N  | Y  | Y  |
| VMS severity                                                              | Maclennan 2004 <sup>26</sup>   | Y                           | Y  | Y | Y  | N | Y | Y | Y  | PY | Y  | Y  | Y  | Y  | Y  | Y  | Y  |
| Urinary incontinence                                                      | Cody 2012 <sup>27</sup>        | Y                           | Y  | Y | PY | Y | Y | Y | PY | PY | N  | Y  | N  | Y  | Y  | N  | Y  |
| <b>Injury, poisoning or certain other consequences of external causes</b> |                                |                             |    |   |    |   |   |   |    |    |    |    |    |    |    |    |    |
| All fracture                                                              | Zhu 2016 <sup>1</sup>          | Y                           | N  | Y | PY | Y | Y | N | PY | N  | N  | N  | N  | N  | Y  | N  | Y  |

**Table D. Quality Assessment of Included Systematic Reviews and/or Meta-Analyses of Randomized Controlled Trials on Menopausal Hormone Therapy and Multiple Outcomes (continued)**

| Outcome <sup>a</sup>                    | Reference                      | AMSTAR 2 Items <sup>b</sup> |    |   |    |   |   |   |    |    |    |    |    |    |    |    |    |
|-----------------------------------------|--------------------------------|-----------------------------|----|---|----|---|---|---|----|----|----|----|----|----|----|----|----|
|                                         |                                | 1                           | 2  | 3 | 4  | 5 | 6 | 7 | 8  | 9  | 10 | 11 | 12 | 13 | 14 | 15 | 16 |
| Vertebral fracture                      | Torgerson 2001 <sup>28</sup>   | Y                           | N  | Y | PY | N | Y | N | PY | PY | N  | Y  | N  | N  | Y  | N  | Y  |
| Nonvertebral fracture                   | Torgerson 2001 <sup>29</sup>   | Y                           | N  | Y | PY | N | Y | N | PY | PY | N  | Y  | Y  | Y  | Y  | Y  | Y  |
| Hip fracture                            | Marjoribanks 2017 <sup>3</sup> | Y                           | Y  | Y | PY | Y | Y | Y | Y  | Y  | Y  | Y  | Y  | Y  | Y  | Y  | Y  |
| <b>Functioning assessment</b>           |                                |                             |    |   |    |   |   |   |    |    |    |    |    |    |    |    |    |
| Cognitive function                      | Lethaby 2008 <sup>30</sup>     | Y                           | Y  | Y | N  | Y | Y | Y | Y  | PY | N  | N  | Y  | Y  | Y  | N  | Y  |
| Cognitive function                      | Marjoribanks 2017 <sup>3</sup> | Y                           | Y  | Y | PY | Y | Y | Y | Y  | Y  | Y  | Y  | Y  | Y  | Y  | Y  | Y  |
| Cognitive function                      | Hogervorst 2009 <sup>31</sup>  | Y                           | Y  | Y | Y  | Y | N | Y | Y  | PY | N  | N  | Y  | Y  | Y  | Y  | Y  |
| Sleep quality                           | Cintron 2017 <sup>32</sup>     | Y                           | PY | Y | PY | Y | Y | N | Y  | Y  | N  | Y  | Y  | Y  | Y  | N  | Y  |
| Sexual function                         | Nastri 2013 <sup>33</sup>      | Y                           | Y  | Y | PY | Y | Y | Y | Y  | Y  | Y  | N  | Y  | Y  | N  | Y  | Y  |
| Skeletal muscle strength                | Greising 2009 <sup>34</sup>    | Y                           | N  | Y | N  | N | N | N | PY | N  | N  | N  | Y  | N  | Y  | Y  | Y  |
| <b>Others, not elsewhere classified</b> |                                |                             |    |   |    |   |   |   |    |    |    |    |    |    |    |    |    |
| All-cause mortality                     | Benkhadra 2015 <sup>4</sup>    | Y                           | PY | Y | PY | Y | Y | N | Y  | Y  | Y  | N  | N  | Y  | Y  | N  | Y  |
| <b>CaVD</b>                             |                                |                             |    |   |    |   |   |   |    |    |    |    |    |    |    |    |    |
| Incidence                               | Sare 2008 <sup>17</sup>        | Y                           | N  | Y | N  | N | Y | N | PY | PY | N  | Y  | Y  | N  | Y  | N  | Y  |
| Mortality                               | Salpeter 2004 <sup>35</sup>    | Y                           | N  | Y | PY | Y | Y | N | PY | PY | N  | Y  | Y  | N  | Y  | N  | Y  |

Abbreviations: AMSTAR, A MeaSurement Tool to Assess systematic Reviews; BMD, bone mineral density; CaVD, cardiovascular disease; CeVD, cerebrovascular disease; CHD, coronary heart disease; CR, coronary revascularization; HbA1c, hemoglobin A1c; HDL, high-density lipoprotein; LDL, low-density lipoprotein; MI, myocardial infarction; PAI-1, plasminogen activator inhibitor-1; RUT1, recurrent urinary tract infection; TIA, transient ischaemic attack; VMS, vasomotor symptom; VTE, venous thromboembolism.

<sup>a</sup> Incidence unless otherwise indicated.

<sup>b</sup> The revised AMSTAR (AMSTAR 2) has 13 items for systematic reviews and 16 items for meta-analyses.

<sup>c</sup> Postmenopausal women with diabetes.

<sup>d</sup> Postmenopausal women without diabetes.

<sup>e</sup> Gallbladder disease requiring surgery.

1 – Did the research questions and inclusion criteria for the review include the components of PICO? (yes/no)

2 – Did the report of the review contain an explicit statement that the review methods were established prior to the conduct of the review and did the report justify any significant deviations from the protocol? (yes/partial yes/no)

3 – Did the review authors explain their selection of the study designs for inclusion in the review? (yes/no)

4 – Did the review authors use a comprehensive literature search strategy? (yes/partial yes/no)

5 – Did the review authors perform study selection in duplicate? (yes/no)

6 – Did the review authors perform data extraction in duplicate? (yes/no)

7 – Did the review authors provide a list of excluded studies and justify the exclusions? (yes/partial yes/no)

8 – Did the review authors describe the included studies in adequate detail? (yes/partial yes/no)



- 9 – Did the review authors use a satisfactory technique for assessing the risk of bias (RoB) in individual studies that were included in the review? (yes/partial yes/no)
- 10 – Did the review authors report on the sources of funding for the studies included in the review? (yes/no)
- 11 – If meta-analysis was performed, did the review authors use appropriate methods for statistical combination of results? (yes/no/no meta-analysis conducted)
- 12 – If meta-analysis was performed, did the review authors assess the potential impact of RoB in individual studies on the results of the meta-analysis or other evidence synthesis? (yes/no/no meta-analysis conducted)
- 13 – Did the review authors account for RoB in individual studies when interpreting/discussing the results of the review? (yes/no)
- 14 – Did the review authors provide a satisfactory explanation for, and discussion of, any heterogeneity observed in the results of the review? (yes/no)
- 15 – If they performed quantitative synthesis, did the review authors carry out an adequate investigation of publication bias (small study bias) and discuss its likely impact on the results of the review? (yes/no/no meta-analysis conducted)
- 16 – Did the review authors report any potential sources of conflict of interest, including any funding they received for conducting the review? (yes/no)

|                                                                                   |                                 |
|-----------------------------------------------------------------------------------|---------------------------------|
|  | Yes (Y)                         |
|  | Partial Yes (PY)                |
|  | No (N)                          |
|  | No meta-analysis conducted (NM) |

**Table E. Quality Assessment of Included Systematic Reviews and/or Meta-Analyses of Observational Epidemiological Studies on Menopausal Hormone Therapy and Multiple Outcomes**

| Outcome <sup>a</sup>      | Reference                          | AMSTAR 2 Items <sup>b</sup> |    |   |    |   |   |   |    |    |    |    |    |    |    |    |    |
|---------------------------|------------------------------------|-----------------------------|----|---|----|---|---|---|----|----|----|----|----|----|----|----|----|
|                           |                                    | 1                           | 2  | 3 | 4  | 5 | 6 | 7 | 8  | 9  | 10 | 11 | 12 | 13 | 14 | 15 | 16 |
| <b>Neoplasms</b>          |                                    |                             |    |   |    |   |   |   |    |    |    |    |    |    |    |    |    |
| Cutaneous melanoma        | Gandini 2011 <sup>36</sup>         | Y                           | N  | Y | PY | N | Y | N | PY | N  | N  | Y  | N  | N  | Y  | N  | Y  |
| Head and neck cancer      | McCarthy 2017 <sup>37</sup>        | Y                           | N  | Y | N  | Y | N | N | PY | PY | N  | NM | NM | Y  | Y  | NM | Y  |
| Glioma                    | Qi 2013 <sup>38</sup>              | Y                           | N  | N | PY | N | Y | Y | PY | PY | N  | Y  | N  | Y  | Y  | N  | Y  |
| Meningioma                | Qi 2013 <sup>40</sup>              | Y                           | N  | Y | PY | N | Y | Y | PY | N  | N  | Y  | N  | Y  | Y  | Y  | Y  |
| Thyroid cancer            | Cao 2015 <sup>41</sup>             | Y                           | N  | Y | PY | N | Y | N | PY | N  | N  | N  | N  | N  | Y  | N  | Y  |
| Esophageal cancer         | Zhu 2017 <sup>42</sup>             | Y                           | N  | N | PY | N | N | N | PY | PY | N  | N  | N  | N  | Y  | N  | Y  |
| Gastric cancer            | Camargo 2012 <sup>43</sup>         | Y                           | N  | N | N  | Y | Y | Y | PY | N  | N  | Y  | N  | Y  | Y  | N  | Y  |
| Colorectal cancer         | Green 2012 <sup>44</sup>           | Y                           | N  | Y | PY | N | N | N | N  | N  | N  | N  | N  | N  | N  | N  | Y  |
| Pancreatic cancer         | Tang 2015 <sup>45</sup>            | Y                           | N  | N | PY | N | Y | Y | PY | N  | N  | Y  | Y  | Y  | Y  | Y  | Y  |
| Primary liver cancer      | Zhong 2016 <sup>46</sup>           | Y                           | N  | N | PY | N | Y | Y | PY | PY | N  | Y  | N  | N  | N  | N  | Y  |
| <b>Lung cancer</b>        |                                    |                             |    |   |    |   |   |   |    |    |    |    |    |    |    |    |    |
| Incidence                 | Yao 2013 <sup>47</sup>             | Y                           | N  | Y | N  | Y | Y | N | PY | PY | N  | N  | N  | N  | Y  | N  | Y  |
| Overall survival          | Li 2017 <sup>49</sup>              | Y                           | N  | Y | N  | Y | N | N | PY | PY | N  | N  | N  | Y  | Y  | N  | Y  |
| <b>Breast cancer</b>      |                                    |                             |    |   |    |   |   |   |    |    |    |    |    |    |    |    |    |
| Incidence                 | Anothaisintawee 2013 <sup>50</sup> | Y                           | N  | Y | PY | N | N | N | PY | N  | N  | N  | N  | N  | N  | N  | Y  |
| Recurrence                | Col 2005 <sup>5</sup>              | Y                           | N  | Y | N  | N | Y | Y | PY | N  | N  | N  | N  | Y  | Y  | N  | Y  |
| Mortality                 | Yu 2017 <sup>52</sup>              | Y                           | N  | Y | PY | Y | Y | Y | PY | PY | N  | Y  | Y  | N  | N  | Y  | Y  |
| Specific survival         | Yu 2017 <sup>52</sup>              | Y                           | N  | Y | PY | Y | Y | Y | PY | PY | N  | Y  | Y  | N  | N  | Y  | Y  |
| Overall survival          | Yu 2017 <sup>52</sup>              | Y                           | N  | Y | PY | Y | Y | Y | PY | PY | N  | Y  | Y  | N  | N  | Y  | Y  |
| <b>Endometrial cancer</b> |                                    |                             |    |   |    |   |   |   |    |    |    |    |    |    |    |    |    |
| Incidence                 | Grady 1995 <sup>53</sup>           | Y                           | N  | Y | N  | N | N | Y | PY | N  | N  | N  | N  | Y  | N  | N  | N  |
| Recurrence                | Shim 2014 <sup>55</sup>            | Y                           | N  | Y | PY | N | Y | Y | Y  | N  | N  | N  | N  | Y  | Y  | Y  | Y  |
| Mortality                 | Grady 1995 <sup>53</sup>           | Y                           | N  | Y | N  | N | N | Y | PY | N  | N  | N  | N  | Y  | N  | N  | N  |
| <b>Ovarian cancer</b>     |                                    |                             |    |   |    |   |   |   |    |    |    |    |    |    |    |    |    |
| Incidence                 | Greiser 2007 <sup>56</sup>         | Y                           | N  | Y | PY | Y | Y | Y | Y  | N  | N  | N  | N  | N  | N  | N  | Y  |
| Recurrence                | Li 2015 <sup>6</sup>               | Y                           | PY | Y | PY | Y | Y | N | PY | PY | N  | N  | Y  | Y  | Y  | N  | Y  |
| Overall survival          | Li 2015 <sup>6</sup>               | Y                           | PY | Y | PY | Y | Y | N | PY | PY | N  | N  | Y  | Y  | Y  | N  | Y  |

**Table E. Quality Assessment of Included Systematic Reviews and/or Meta-Analyses of Observational Epidemiological Studies on Menopausal Hormone Therapy and Multiple Outcomes (continued)**

| Outcome <sup>a</sup>                                               | Reference                           | AMSTAR 2 Items <sup>b</sup> |    |   |    |   |   |   |    |    |    |    |    |    |    |    |    |
|--------------------------------------------------------------------|-------------------------------------|-----------------------------|----|---|----|---|---|---|----|----|----|----|----|----|----|----|----|
|                                                                    |                                     | 1                           | 2  | 3 | 4  | 5 | 6 | 7 | 8  | 9  | 10 | 11 | 12 | 13 | 14 | 15 | 16 |
| <b>Diseases of the immune system</b>                               |                                     |                             |    |   |    |   |   |   |    |    |    |    |    |    |    |    |    |
| SLE                                                                | Rojas-Villarraga 2014 <sup>59</sup> | Y                           | N  | Y | PY | Y | Y | N | PY | N  | N  | Y  | N  | N  | Y  | N  | Y  |
| <b>Endocrine, nutritional or metabolic diseases</b>                |                                     |                             |    |   |    |   |   |   |    |    |    |    |    |    |    |    |    |
| Diabetes mellitus                                                  | Xu 2014 <sup>10</sup>               | Y                           | N  | N | PY | Y | Y | N | PY | N  | N  | N  | N  | N  | Y  | N  | Y  |
| <b>Mental or behavioural disorders</b>                             |                                     |                             |    |   |    |   |   |   |    |    |    |    |    |    |    |    |    |
| Dementia                                                           | O'Brien 2014 <sup>19</sup>          | Y                           | N  | Y | PY | N | N | N | Y  | N  | N  | N  | N  | Y  | N  | N  | Y  |
| <b>Diseases of the nervous system</b>                              |                                     |                             |    |   |    |   |   |   |    |    |    |    |    |    |    |    |    |
| Parkinson disease                                                  | Wang 2015 <sup>60</sup>             | Y                           | N  | N | PY | N | Y | N | N  | PY | N  | Y  | Y  | Y  | N  | Y  | Y  |
| Alzheimer disease                                                  | LeBlanc 2001 <sup>61</sup>          | Y                           | N  | Y | PY | N | N | N | Y  | PY | N  | Y  | Y  | Y  | Y  | N  | Y  |
| <b>Diseases of the visual system</b>                               |                                     |                             |    |   |    |   |   |   |    |    |    |    |    |    |    |    |    |
| Cataract                                                           | Lai 2013 <sup>63</sup>              | Y                           | N  | Y | PY | N | Y | Y | PY | PY | N  | N  | N  | Y  | Y  | N  | Y  |
| <b>Diseases of the circulatory system</b>                          |                                     |                             |    |   |    |   |   |   |    |    |    |    |    |    |    |    |    |
| CHD                                                                |                                     |                             |    |   |    |   |   |   |    |    |    |    |    |    |    |    |    |
| Incidence                                                          | Humphrey 2002 <sup>64</sup>         | Y                           | N  | Y | PY | Y | N | N | PY | PY | N  | N  | Y  | Y  | Y  | N  | Y  |
| Mortality                                                          | Humphrey 2002 <sup>64</sup>         | Y                           | N  | Y | PY | Y | N | N | PY | PY | N  | N  | Y  | Y  | Y  | N  | Y  |
| VTE                                                                | Canonico 2008 <sup>21</sup>         | Y                           | N  | Y | N  | N | Y | N | PY | PY | N  | N  | Y  | Y  | Y  | N  | Y  |
| Deep vein thrombosis                                               | Canonico 2008 <sup>21</sup>         | Y                           | N  | Y | N  | N | Y | N | PY | PY | N  | N  | Y  | Y  | Y  | N  | Y  |
| Pulmonary embolism                                                 | Canonico 2008 <sup>21</sup>         | Y                           | N  | Y | N  | N | Y | N | PY | PY | N  | N  | Y  | Y  | Y  | N  | Y  |
| <b>Diseases of the respiratory system</b>                          |                                     |                             |    |   |    |   |   |   |    |    |    |    |    |    |    |    |    |
| Asthma                                                             | McCleary 2018 <sup>65</sup>         | Y                           | PY | Y | Y  | Y | Y | N | PY | PY | N  | Y  | N  | Y  | N  | Y  | Y  |
| <b>Diseases of the digestive system</b>                            |                                     |                             |    |   |    |   |   |   |    |    |    |    |    |    |    |    |    |
| Cholelithiasis                                                     | Wang 2017 <sup>66</sup>             | Y                           | N  | N | PY | N | Y | N | PY | PY | N  | N  | Y  | N  | Y  | N  | Y  |
| <b>Diseases of the musculoskeletal system or connective tissue</b> |                                     |                             |    |   |    |   |   |   |    |    |    |    |    |    |    |    |    |
| Osteoarthritis                                                     | de Klerk 2009 <sup>67</sup>         | Y                           | N  | Y | PY | Y | Y | N | PY | N  | Y  | NM | NM | Y  | N  | NM | Y  |
| <b>Others, not elsewhere classified</b>                            |                                     |                             |    |   |    |   |   |   |    |    |    |    |    |    |    |    |    |
| All-cause mortality                                                | Salpeter 2009 <sup>68</sup>         | Y                           | N  | Y | N  | Y | Y | N | N  | N  | N  | Y  | N  | N  | Y  | N  | Y  |

**Table E. Quality Assessment of Included Systematic Reviews and/or Meta-Analyses of Observational Epidemiological Studies on Menopausal Hormone Therapy and Multiple Outcomes (continued)**

| Outcome <sup>a</sup> | Reference                   | AMSTAR 2 Items <sup>b</sup> |   |   |    |   |   |   |    |    |    |    |    |    |    |    |    |
|----------------------|-----------------------------|-----------------------------|---|---|----|---|---|---|----|----|----|----|----|----|----|----|----|
|                      |                             | 1                           | 2 | 3 | 4  | 5 | 6 | 7 | 8  | 9  | 10 | 11 | 12 | 13 | 14 | 15 | 16 |
| CaVD                 |                             |                             |   |   |    |   |   |   |    |    |    |    |    |    |    |    |    |
| Incidence            | Humphrey 2002 <sup>64</sup> | Y                           | N | Y | PY | Y | N | N | PY | PY | N  | N  | Y  | Y  | Y  | N  | Y  |
| Mortality            | Humphrey 2002 <sup>64</sup> | Y                           | N | Y | PY | Y | N | N | PY | PY | N  | N  | Y  | Y  | Y  | N  | Y  |

Abbreviations: AMSTAR, A MeaSurement Tool to Assess systematic Reviews; CaVD, cardiovascular disease; CHD, coronary heart disease; SLE, systemic lupus erythematosus; VTE, venous thromboembolism.

<sup>a</sup> Incidence unless otherwise indicated.

<sup>b</sup> The revised AMSTAR (AMSTAR 2) has 13 items for systematic reviews and 16 items for meta-analyses.

1 – Did the research questions and inclusion criteria for the review include the components of PICO? (yes/no)

2 – Did the report of the review contain an explicit statement that the review methods were established prior to the conduct of the review and did the report justify any significant deviations from the protocol? (yes/partial yes/no)

3 – Did the review authors explain their selection of the study designs for inclusion in the review? (yes/no)

4 – Did the review authors use a comprehensive literature search strategy? (yes/partial yes/no)

5 – Did the review authors perform study selection in duplicate? (yes/no)

6 – Did the review authors perform data extraction in duplicate? (yes/no)

7 – Did the review authors provide a list of excluded studies and justify the exclusions? (yes/partial yes/no)

8 – Did the review authors describe the included studies in adequate detail? (yes/partial yes/no)

9 – Did the review authors use a satisfactory technique for assessing the risk of bias (RoB) in individual studies that were included in the review? (yes/partial yes/no)

10 – Did the review authors report on the sources of funding for the studies included in the review? (yes/no)

11 – If meta-analysis was performed, did the review authors use appropriate methods for statistical combination of results? (yes/no/no meta-analysis conducted)

12 – If meta-analysis was performed, did the review authors assess the potential impact of RoB in individual studies on the results of the meta-analysis or other evidence synthesis? (yes/no/no meta-analysis conducted)

13 – Did the review authors account for RoB in individual studies when interpreting/discussing the results of the review? (yes/no)

14 – Did the review authors provide a satisfactory explanation for, and discussion of, any heterogeneity observed in the results of the review? (yes/no)

15 – If they performed quantitative synthesis, did the review authors carry out an adequate investigation of publication bias (small study bias) and discuss its likely impact on the results of the review? (yes/no/no meta-analysis conducted)

16 – Did the review authors report any potential sources of conflict of interest, including any funding they received for conducting the review? (yes/no)

|                                                                                     |                                 |
|-------------------------------------------------------------------------------------|---------------------------------|
|  | Yes (Y)                         |
|  | Partial Yes (PY)                |
|  | No (N)                          |
|  | No meta-analysis conducted (NM) |

Table F. Any Menopausal Hormone Therapy for Primary Prevention of Multiple Outcomes in Included Systematic Reviews and Meta-Analyses of Randomized Controlled Trials<sup>a</sup>

| Outcome <sup>b</sup>                                                                             | No. of Trials | No. of Events/Total No. |              | Metric (unit)           | Most Precise Study <sup>c</sup> | Summary Effect <sup>d</sup> | P-Value <sup>e</sup>  | T <sup>f</sup> | 95% PI <sup>g</sup> | Proportion of True Effects ( $\theta$ ) Below/Above a Threshold (%) <sup>h</sup> |                                 |                                 |                         |
|--------------------------------------------------------------------------------------------------|---------------|-------------------------|--------------|-------------------------|---------------------------------|-----------------------------|-----------------------|----------------|---------------------|----------------------------------------------------------------------------------|---------------------------------|---------------------------------|-------------------------|
|                                                                                                  |               | Any MHT                 | Control      |                         |                                 |                             |                       |                |                     | $\hat{P}(\theta < q)$                                                            | $\hat{P}(\theta < \text{null})$ | $\hat{P}(\theta > \text{null})$ | $\hat{P}(\theta > q^*)$ |
| <b>Neoplasms</b>                                                                                 |               |                         |              |                         |                                 |                             |                       |                |                     |                                                                                  |                                 |                                 |                         |
| All cancer                                                                                       |               |                         |              |                         |                                 |                             |                       |                |                     |                                                                                  |                                 |                                 |                         |
| Incidence                                                                                        | 12            | 2,180/19,724            | 2,112/18,918 | RR                      | 1.04 (0.97, 1.12)               | 1.01 (0.70, 1.45)           | $8.9 \times 10^{-1}$  | 0              | N/A                 | N/A                                                                              | N/A                             | N/A                             | N/A                     |
| Mortality                                                                                        | 5             | 1,185/17,796            | 1,124/17,476 | RR                      | 1.05 (0.95, 1.17)               | 1.03 (0.80, 1.34)           | $4.4 \times 10^{-1}$  | 0              | N/A                 | N/A                                                                              | N/A                             | N/A                             | N/A                     |
| Colorectal cancer                                                                                |               |                         |              |                         |                                 |                             |                       |                |                     |                                                                                  |                                 |                                 |                         |
| Incidence                                                                                        | 8             | 268/18,687              | 289/17,867   | RR                      | 0.80 (0.63, 1.01)               | 0.91 (0.46, 1.77)           | $5.4 \times 10^{-1}$  | 0              | N/A                 | N/A                                                                              | N/A                             | N/A                             | N/A                     |
| Mortality                                                                                        | 2             | 100/13,816              | 90/13,531    | RR                      | 1.01 (0.69, 1.48)               | 1.09 (0.36, 3.28)           | $4.9 \times 10^{-1}$  | 0              | N/A                 | N/A                                                                              | N/A                             | N/A                             | N/A                     |
| Lung cancer                                                                                      |               |                         |              |                         |                                 |                             |                       |                |                     |                                                                                  |                                 |                                 |                         |
| Incidence                                                                                        | 4             | 366/15,266              | 325/14,986   | RR                      | 1.13 (0.93, 1.38)               | 1.10 (0.74, 1.63)           | $2.9 \times 10^{-1}$  | 0              | N/A                 | N/A                                                                              | N/A                             | N/A                             | N/A                     |
| Mortality                                                                                        | 4             | 208/15,266              | 184/14,986   | RR                      | 1.10 (0.88, 1.39)               | 1.09 (0.98, 1.22)           | $6.2 \times 10^{-2}$  | 0              | N/A                 | N/A                                                                              | N/A                             | N/A                             | N/A                     |
| Breast cancer                                                                                    |               |                         |              |                         |                                 |                             |                       |                |                     |                                                                                  |                                 |                                 |                         |
| Incidence                                                                                        | 15            | 910/20,742              | 813/19,430   | RR                      | 1.24 (1.10, 1.40)               | 1.05 (0.71, 1.57)           | $7.0 \times 10^{-1}$  | 0.18           | 0.75 to 1.29        | 13 (0, 100)                                                                      | 33 (0, 100)                     | 67 (0, 100)                     | 47 (0, 100)             |
| Mortality                                                                                        | 3             | 104/15,196              | 99/14,914    | RR                      | 1.28 (0.90, 1.82)               | 1.03 (0.06, 17.26)          | $9.5 \times 10^{-1}$  | 0.44           | N/A                 | N/A                                                                              | N/A                             | N/A                             | N/A                     |
| Endometrial cancer                                                                               | 6             | 76/11,278               | 106/10,026   | RR                      | 0.67 (0.50, 0.92)               | 0.65 (0.17, 2.44)           | $1.7 \times 10^{-1}$  | 0              | N/A                 | N/A                                                                              | N/A                             | N/A                             | N/A                     |
| Ovarian cancer                                                                                   | 2             | 53/8,829                | 42/8,422     | RR                      | 1.23 (0.82, 1.85)               | 1.21 (0.15, 9.77)           | $4.6 \times 10^{-1}$  | 0              | N/A                 | N/A                                                                              | N/A                             | N/A                             | N/A                     |
| <b>Symptoms, signs or clinical findings of blood, blood-forming organs, or the immune system</b> |               |                         |              |                         |                                 |                             |                       |                |                     |                                                                                  |                                 |                                 |                         |
| C-reactive protein <sup>i</sup>                                                                  | 12            | 1,444                   | 627          | MD (% change)           | 27.10 (6.20, 48.00)             | 42.28 (18.14, 66.41)        | $3.9 \times 10^{-3}$  | 20.99          | -1.98 to 77.31      | N/A                                                                              | 0 (N/A, N/A)                    | 100 (50, 100)                   | N/A                     |
| C-reactive protein <sup>i</sup>                                                                  | 4             | 142                     | 156          | MD (mg/L)               | 0.50 (-0.13, 1.13)              | 0.35 (-1.27, 1.96)          | $3.3 \times 10^{-1}$  | 0              | N/A                 | N/A                                                                              | N/A                             | N/A                             | N/A                     |
|                                                                                                  |               |                         |              | RR                      | 0.96 (0.71, 1.30)               | 1.06 (0.71, 1.59)           | $5.9 \times 10^{-1}$  | 0.13           | N/A                 | N/A                                                                              | N/A                             | N/A                             | N/A                     |
| PAI-1 antigen                                                                                    | 13            | 1,323                   | 655          | MD (% change)           | -19.10 (-35.20, -3.00)          | -32.19 (-44.38, -20.01)     | $4.7 \times 10^{-4}$  | 6.52           | -51.53 to -20.47    | N/A                                                                              | 100 (N/A, N/A)                  | 0 (N/A, N/A)                    | N/A                     |
| Fibrinogen                                                                                       | 20            | 2,303                   | 905          | MD (% change)           | -4.40 (-7.00, -1.80)            | -5.43 (-7.36, -3.49)        | $9.3 \times 10^{-4}$  | 0              | N/A                 | N/A                                                                              | N/A                             | N/A                             | N/A                     |
| E-selectin                                                                                       | 7             | 985                     | 352          | MD (% change)           | -19.00 (-25.30, -12.70)         | -17.63 (-26.74, -8.51)      | $1.6 \times 10^{-2}$  | 0              | N/A                 | N/A                                                                              | N/A                             | N/A                             | N/A                     |
| <b>Symptoms, signs or clinical findings of endocrine, nutritional or metabolic diseases</b>      |               |                         |              |                         |                                 |                             |                       |                |                     |                                                                                  |                                 |                                 |                         |
| Insulin resistance                                                                               | 18            | 2,430                   | 1,207        | MD (% change)           | -12.40 (-20.90, -3.90)          | -14.17 (-21.94, -6.40)      | $3.9 \times 10^{-3}$  | 1.87           | -20.15 to -11.12    | N/A                                                                              | 100 (N/A, N/A)                  | 0 (N/A, N/A)                    | N/A                     |
| Total cholesterol <sup>j</sup>                                                                   | 11            | 599                     | 565          | MD (mg/dL)              | -18.53 (-27.17, -9.89)          | -13.20 (-19.69, -6.72)      | $1.4 \times 10^{-3}$  | 5.99           | -25.38 to 3.38      | N/A                                                                              | 100 (55, 100)                   | 0 (N/A, N/A)                    | N/A                     |
|                                                                                                  |               |                         |              | RR                      | 1.06 (0.81, 1.38)               | 0.68 (0.56, 0.83)           | $1.7 \times 10^{-3}$  | 0.20           | 0.46 to 1.14        | 91 (0, 100)                                                                      | 100 (55, 100)                   | 0 (N/A, N/A)                    | 0 (N/A, N/A)            |
| Total cholesterol <sup>k</sup>                                                                   | 2             | 44                      | 43           | MD (mg/dL)              | 9.00 (-12.39, 30.39)            | 8.59 (-4.45, 21.64)         | $7.6 \times 10^{-2}$  | 0              | N/A                 | N/A                                                                              | N/A                             | N/A                             | N/A                     |
|                                                                                                  |               |                         |              | RR                      | 1.20 (0.77, 1.87)               | 1.17 (0.67, 2.05)           | $1.7 \times 10^{-1}$  | 0              | N/A                 | N/A                                                                              | N/A                             | N/A                             | N/A                     |
| Total cholesterol <sup>l</sup>                                                                   | 5             | 125                     | 132          | MD (mmol/L)             | -0.46 (-0.84, -0.08)            | -0.39 (-0.78, -0.01)        | $4.8 \times 10^{-2}$  | 0.09           | N/A                 | N/A                                                                              | N/A                             | N/A                             | N/A                     |
| HDL cholesterol <sup>j</sup>                                                                     | 12            | 631                     | 620          | MD (mg/dL)              | 1.54 (-2.62, 5.70)              | 1.41 (-3.56, 6.37)          | $5.4 \times 10^{-1}$  | 7.26           | -10.19 to 24.18     | N/A                                                                              | 42 (0, 67)                      | 58 (17, 83)                     | N/A                     |
|                                                                                                  |               |                         |              | RR                      | 1.17 (0.90, 1.53)               | 1.10 (0.78, 1.54)           | $5.5 \times 10^{-1}$  | 0.39           | 0.53 to 8.51        | 33 (0, 58)                                                                       | 42 (0, 67)                      | 58 (11, 83)                     | 50 (17, 83)             |
| HDL cholesterol <sup>k</sup>                                                                     | 2             | 44                      | 43           | MD (mg/dL)              | 12.30 (5.22, 19.38)             | 11.68 (-6.43, 29.79)        | $7.7 \times 10^{-2}$  | 0              | N/A                 | N/A                                                                              | N/A                             | N/A                             | N/A                     |
|                                                                                                  |               |                         |              | RR                      | 2.15 (1.36, 3.40)               | 1.95 (0.24, 15.88)          | $1.5 \times 10^{-1}$  | 0              | N/A                 | N/A                                                                              | N/A                             | N/A                             | N/A                     |
| HDL cholesterol <sup>l</sup>                                                                     | 5             | 125                     | 132          | MD (mmol/L)             | 0.01 (-0.14, 0.16)              | -0.05 (-0.17, 0.07)         | $3.3 \times 10^{-1}$  | 0.01           | N/A                 | N/A                                                                              | N/A                             | N/A                             | N/A                     |
| LDL cholesterol <sup>j</sup>                                                                     | 11            | 600                     | 566          | MD (mg/dL)              | -3.60 (-12.75, 5.55)            | -13.16 (-18.66, -7.67)      | $6.1 \times 10^{-4}$  | 2.88           | -19.93 to -6.05     | N/A                                                                              | 100 (N/A, N/A)                  | 0 (N/A, N/A)                    | N/A                     |
|                                                                                                  |               |                         |              | RR                      | 0.90 (0.69, 1.17)               | 0.70 (0.60, 0.82)           | $8.0 \times 10^{-4}$  | 0.14           | 0.45 to 0.97        | 100 (55, 100)                                                                    | 100 (N/A, N/A)                  | 0 (N/A, N/A)                    | 0 (N/A, N/A)            |
| LDL cholesterol <sup>k</sup>                                                                     | 2             | 44                      | 43           | MD (mg/dL)              | -8.00 (-26.48, 10.48)           | -7.10 (-34.28, 20.07)       | $1.9 \times 10^{-1}$  | 0              | N/A                 | N/A                                                                              | N/A                             | N/A                             | N/A                     |
|                                                                                                  |               |                         |              | RR                      | 0.83 (0.53, 1.29)               | 0.86 (0.36, 2.04)           | $2.7 \times 10^{-1}$  | 0              | N/A                 | N/A                                                                              | N/A                             | N/A                             | N/A                     |
| LDL cholesterol <sup>l</sup>                                                                     | 5             | 124                     | 128          | MD (mmol/L)             | -0.18 (-0.53, 0.17)             | -0.22 (-0.42, -0.01)        | $4.2 \times 10^{-2}$  | 0              | N/A                 | N/A                                                                              | N/A                             | N/A                             | N/A                     |
| LDL/HDL ratio                                                                                    | 55            | 6,362                   | 4,377        | MD (% change)           | -17.00 (-19.30, -14.70)         | -16.25 (-18.83, -13.68)     | $4.0 \times 10^{-15}$ | 5.57           | -30.46 to -4.67     | N/A                                                                              | 100 (93, 98)                    | 0 (N/A, N/A)                    | N/A                     |
| Lipoprotein (a)                                                                                  | 39            | 1,989                   | 1,970        | MD (% change)           | -2.71 (-3.06, -2.36)            | -21.20 (-28.78, -13.62)     | $1.1 \times 10^{-5}$  | 18.23          | -77.87 to 2.47      | N/A                                                                              | 95 (79, 97)                     | 5 (0, 15)                       | N/A                     |
| Triglyceride <sup>j</sup>                                                                        | 10            | 551                     | 514          | MD (mg/dL)              | 3.40 (-12.97, 19.77)            | -4.49 (-18.84, 9.87)        | $4.9 \times 10^{-1}$  | 17.07          | -51.80 to 24.98     | N/A                                                                              | 60 (0, 90)                      | 40 (0, 100)                     | N/A                     |
|                                                                                                  |               |                         |              | RR                      | 1.06 (0.81, 1.38)               | 0.91 (0.68, 1.20)           | $4.5 \times 10^{-1}$  | 0.31           | 0.33 to 1.54        | 30 (0, 70)                                                                       | 60 (0, 90)                      | 40 (0, 100)                     | 20 (0, 100)             |
| Triglyceride <sup>k</sup>                                                                        | 2             | 44                      | 43           | MD (mg/dL)              | 20.00 (-19.01, 59.01)           | 21.08 (-8.20, 50.36)        | $6.9 \times 10^{-2}$  | 0              | N/A                 | N/A                                                                              | N/A                             | N/A                             | N/A                     |
|                                                                                                  |               |                         |              | RR                      | 1.25 (0.80, 1.95)               | 1.26 (1.17, 1.34)           | $1.5 \times 10^{-2}$  | 0              | N/A                 | N/A                                                                              | N/A                             | N/A                             | N/A                     |
| Triglyceride <sup>l</sup>                                                                        | 4             | 106                     | 110          | MD (mmol/L)             | -0.23 (-0.62, 0.16)             | -0.11 (-0.65, 0.43)         | $4.0 \times 10^{-1}$  | 0              | N/A                 | N/A                                                                              | N/A                             | N/A                             | N/A                     |
| Triglyceride <sup>i</sup>                                                                        | 52            | 6,008                   | 4,214        | MD (% change)           | 9.20 (7.30, 11.10)              | 2.39 (-0.69, 5.48)          | $1.2 \times 10^{-1}$  | 4.87           | -12.67 to 10.94     | N/A                                                                              | 25 (0, 77)                      | 75 (0, 100)                     | N/A                     |
| Body mass index <sup>m</sup>                                                                     | 12            | 12,862                  | 13,363       | MD (kg/m <sup>2</sup> ) | 0.00 (-0.20, 0.20)              | -0.11 (-0.48, 0.26)         | $3.2 \times 10^{-1}$  | 0              | N/A                 | N/A                                                                              | N/A                             | N/A                             | N/A                     |
|                                                                                                  |               |                         |              | RR                      | 1.00 (0.97, 1.03)               | 0.99 (0.93, 1.05)           | $3.7 \times 10^{-1}$  | 0              | N/A                 | N/A                                                                              | N/A                             | N/A                             | N/A                     |
| Body mass index <sup>i</sup>                                                                     | 2             | 84                      | 77           | MD (kg/m <sup>2</sup> ) | 0.00 (-1.23, 1.23)              | 0.17 (-7.00, 7.35)          | $8.1 \times 10^{-1}$  | 0              | N/A                 | N/A                                                                              | N/A                             | N/A                             | N/A                     |

|                                                                           |    |              |              |                              |                       |                       |                      |      |               |               |                |                |              |
|---------------------------------------------------------------------------|----|--------------|--------------|------------------------------|-----------------------|-----------------------|----------------------|------|---------------|---------------|----------------|----------------|--------------|
|                                                                           |    |              |              | RR                           | 1.00 (0.74, 1.36)     | 1.08 (0.13, 9.27)     | $7.3 \times 10^{-1}$ | 0.10 | N/A           | N/A           | N/A            | N/A            | N/A          |
| Body mass index <sup>l</sup>                                              | 2  | 73           | 74           | MD (kg/m <sup>2</sup> )      | -0.79 (-2.81, 1.23)   | -1.05 (-6.67, 4.57)   | $2.5 \times 10^{-1}$ | 0    | N/A           | N/A           | N/A            | N/A            | N/A          |
| Body weight                                                               | 22 | 14,486       | 14,073       | MD (kg)                      | 0.30 (-0.27, 0.87)    | -0.03 (-0.67, 0.60)   | $9.0 \times 10^{-1}$ | 0.36 | -1.56 to 1.18 | N/A           | 59 (0, 100)    | 41 (0, 100)    | N/A          |
|                                                                           |    |              |              | RR                           | 1.02 (0.99, 1.05)     | 1.00 (0.95, 1.05)     | $1.0 \times 10^{-0}$ | 0.01 | 0.92 to 1.08  | 0 (N/A, N/A)  | 59 (0, 100)    | 41 (0, 100)    | 0 (N/A, N/A) |
| Abdominal fat                                                             | 4  | 136          | 85           | MD (% change)                | -5.80 (-11.50, -0.10) | -6.89 (-25.53, 11.75) | $1.7 \times 10^{-1}$ | 0    | N/A           | N/A           | N/A            | N/A            | N/A          |
| Waist circumference                                                       | 5  | 3,873        | 3,164        | MD (% change)                | -0.70 (-1.10, -0.30)  | -0.82 (-4.04, 2.39)   | $2.0 \times 10^{-1}$ | 0    | N/A           | N/A           | N/A            | N/A            | N/A          |
| Waist/hip ratio                                                           | 2  | 209          | 195          | MD                           | 0.00 (-0.02, 0.02)    | 0.00 (0.00, 0.00)     | N/A                  | 0    | N/A           | N/A           | N/A            | N/A            | N/A          |
|                                                                           |    |              |              | RR                           | 1.00 (0.82, 1.21)     | 1.00 (1.00, 1.00)     | N/A                  | 0    | N/A           | N/A           | N/A            | N/A            | N/A          |
| BMD of lumbar spine <sup>n</sup>                                          | 2  | 13           | 23           | MD (g/cm <sup>2</sup> /year) | 2.10 (-0.73, 4.93)    | 1.26 (-11.48, 14.00)  | $4.3 \times 10^{-1}$ | 0    | N/A           | N/A           | N/A            | N/A            | N/A          |
|                                                                           |    |              |              | RR                           | 1.02 (0.46, 2.23)     | 1.42 (0.01, 231.76)   | $5.4 \times 10^{-1}$ | 0.33 | N/A           | N/A           | N/A            | N/A            | N/A          |
| BMD of proximal femur <sup>n</sup>                                        | 2  | 13           | 23           | MD (g/cm <sup>2</sup> /year) | 2.30 (0.67, 3.93)     | 2.24 (0.60, 3.89)     | $3.7 \times 10^{-2}$ | 0    | N/A           | N/A           | N/A            | N/A            | N/A          |
|                                                                           |    |              |              | RR                           | 1.45 (0.66, 3.22)     | 2.16 (0.01, 845.14)   | $3.5 \times 10^{-1}$ | 0.46 | N/A           | N/A           | N/A            | N/A            | N/A          |
| <b>Mental or behavioural disorders</b>                                    |    |              |              |                              |                       |                       |                      |      |               |               |                |                |              |
| Dementia (probable)                                                       | 2  | 68/3,693     | 40/3,786     | RR                           | 1.97 (1.16, 3.33)     | 1.74 (0.30, 9.97)     | $1.6 \times 10^{-1}$ | 0    | N/A           | N/A           | N/A            | N/A            | N/A          |
| <b>Mental or behavioural symptoms, signs or clinical findings</b>         |    |              |              |                              |                       |                       |                      |      |               |               |                |                |              |
| Depressive symptom                                                        | 5  | 437          | 389          | SMD                          | 0.10 (-0.09, 0.29)    | -0.13 (-0.64, 0.38)   | $5.1 \times 10^{-1}$ | 0.37 | N/A           | N/A           | N/A            | N/A            | N/A          |
|                                                                           |    |              |              | RR                           | 1.09 (0.92, 1.30)     | 0.89 (0.56, 1.41)     | $5.1 \times 10^{-1}$ | 0.34 | N/A           | N/A           | N/A            | N/A            | N/A          |
| <b>Diseases of the nervous system</b>                                     |    |              |              |                              |                       |                       |                      |      |               |               |                |                |              |
| Cerebrovascular disease                                                   | 21 | 553/21,664   | 430/20,617   | RR                           | 1.37 (1.08, 1.73)     | 1.25 (1.04, 1.50)     | $3.0 \times 10^{-2}$ | 0    | N/A           | N/A           | N/A            | N/A            | N/A          |
| Stroke                                                                    | 17 | 785/19,090   | 661/18,182   | RR                           | 1.15 (0.99, 1.33)     | 1.17 (1.05, 1.29)     | $2.7 \times 10^{-2}$ | 0    | N/A           | N/A           | N/A            | N/A            | N/A          |
| Fatal stroke                                                              | 6  | 333/17,633   | 303/17,268   | RR                           | 1.11 (0.90, 1.37)     | 1.08 (0.63, 1.83)     | $4.2 \times 10^{-1}$ | 0    | N/A           | N/A           | N/A            | N/A            | N/A          |
| Non-fatal stroke                                                          | 11 | 299/16,732   | 217/15,924   | RR                           | 1.37 (1.04, 1.81)     | 1.35 (1.08, 1.69)     | $2.5 \times 10^{-2}$ | 0    | N/A           | N/A           | N/A            | N/A            | N/A          |
| Transient ischaemic attack                                                | 6  | 54/3,098     | 60/2,564     | RR                           | 0.80 (0.51, 1.23)     | 0.88 (0.30, 2.60)     | $5.0 \times 10^{-1}$ | 0    | N/A           | N/A           | N/A            | N/A            | N/A          |
| Alzheimer disease                                                         | 2  | 33/3,693     | 21/3,786     | RR                           | 1.72 (0.84, 3.51)     | 1.61 (0.58, 4.46)     | $1.1 \times 10^{-1}$ | 0    | N/A           | N/A           | N/A            | N/A            | N/A          |
| <b>Diseases of the circulatory system</b>                                 |    |              |              |                              |                       |                       |                      |      |               |               |                |                |              |
| Coronary heart disease                                                    |    |              |              |                              |                       |                       |                      |      |               |               |                |                |              |
| Incidence                                                                 | 17 | 1,063/20,261 | 1,021/19,187 | RR                           | 1.08 (0.95, 1.22)     | 1.02 (0.82, 1.26)     | $7.5 \times 10^{-1}$ | 0    | N/A           | N/A           | N/A            | N/A            | N/A          |
| Mortality                                                                 | 6  | 566/14,952   | 581/14,659   | RR                           | 1.04 (0.88, 1.21)     | 0.96 (0.46, 2.00)     | $6.7 \times 10^{-1}$ | 0    | N/A           | N/A           | N/A            | N/A            | N/A          |
| MI                                                                        | 15 | 714/19,486   | 658/18,592   | RR                           | 1.14 (0.99, 1.32)     | 1.06 (0.65, 1.75)     | $4.8 \times 10^{-1}$ | 0    | N/A           | N/A           | N/A            | N/A            | N/A          |
| Fatal MI                                                                  | 6  | 3/1,029      | 8/1,018      | RR                           | 0.19 (0.02, 1.65)     | 0.52 (0.12, 2.14)     | $2.7 \times 10^{-1}$ | 0    | N/A           | N/A           | N/A            | N/A            | N/A          |
| Non-fatal MI                                                              | 8  | 327/17,635   | 300/16,805   | RR                           | 0.91 (0.73, 1.13)     | 1.06 (0.34, 3.30)     | $7.4 \times 10^{-1}$ | 0    | N/A           | N/A           | N/A            | N/A            | N/A          |
| Angina pectoris                                                           |    |              |              |                              |                       |                       |                      |      |               |               |                |                |              |
| Any angina                                                                | 2  | 269/13,816   | 297/13,531   | RR                           | 0.97 (0.79, 1.20)     | 0.90 (0.26, 3.07)     | $4.6 \times 10^{-1}$ | 0.07 | N/A           | N/A           | N/A            | N/A            | N/A          |
| Unstable angina                                                           | 1  | 3/2,196      | 0/2,189      | RR                           | 6.98 (0.36, 135.01)   | N/A                   | N/A                  | N/A  | N/A           | N/A           | N/A            | N/A            | N/A          |
| Venous thromboembolism                                                    | 23 | 479/21,830   | 321/20,462   | RR                           | 1.04 (0.84, 1.29)     | 1.60 (0.99, 2.58)     | $5.2 \times 10^{-2}$ | 0.24 | 1.03 to 2.99  | 0 (N/A, N/A)  | 0 (N/A, N/A)   | 100 (78, 100)  | 96 (0, 100)  |
| Deep vein thrombosis                                                      | 14 | 405/19,906   | 310/19,017   | RR                           | 1.25 (1.02, 1.53)     | 1.39 (0.68, 2.84)     | $1.9 \times 10^{-1}$ | 0.19 | 1.01 to 2.38  | 0 (N/A, N/A)  | 0 (N/A, N/A)   | 100 (N/A, N/A) | 93 (0, 100)  |
| Pulmonary embolism                                                        | 9  | 309/19,465   | 236/18,426   | RR                           | 1.28 (1.02, 1.61)     | 1.26 (0.81, 1.94)     | $1.1 \times 10^{-1}$ | 0    | N/A           | N/A           | N/A            | N/A            | N/A          |
| <b>Symptoms, signs or clinical findings of the circulatory system</b>     |    |              |              |                              |                       |                       |                      |      |               |               |                |                |              |
| Cardiac death                                                             | 4  | 104/14,264   | 107/13,969   | RR                           | 0.94 (0.65, 1.35)     | 0.96 (0.67, 1.39)     | $6.3 \times 10^{-1}$ | 0    | N/A           | N/A           | N/A            | N/A            | N/A          |
| Coronary revascularization                                                | 3  | 912/13,927   | 869/13,642   | RR                           | 1.02 (0.91, 1.16)     | 1.03 (0.90, 1.18)     | $2.0 \times 10^{-1}$ | 0    | N/A           | N/A           | N/A            | N/A            | N/A          |
| Systolic blood pressure                                                   | 6  | 341          | 306          | MD (mmHg)                    | -0.63 (-3.55, 2.29)   | 0.84 (-5.67, 7.36)    | $7.5 \times 10^{-1}$ | 5.19 | N/A           | N/A           | N/A            | N/A            | N/A          |
|                                                                           |    |              |              | RR                           | 0.95 (0.75, 1.21)     | 1.07 (0.65, 1.75)     | $7.4 \times 10^{-1}$ | 0.40 | N/A           | N/A           | N/A            | N/A            | N/A          |
| Diastolic blood pressure                                                  | 6  | 341          | 306          | MD (mmHg)                    | 1.90 (-0.45, 4.25)    | -0.31 (-2.94, 2.33)   | $7.6 \times 10^{-1}$ | 1.18 | N/A           | N/A           | N/A            | N/A            | N/A          |
|                                                                           |    |              |              | RR                           | 1.05 (0.82, 1.33)     | 0.95 (0.75, 1.22)     | $6.3 \times 10^{-1}$ | 0.12 | N/A           | N/A           | N/A            | N/A            | N/A          |
| <b>Diseases of the digestive system</b>                                   |    |              |              |                              |                       |                       |                      |      |               |               |                |                |              |
| Gallbladder disease <sup>o</sup>                                          | 5  | 536/13,734   | 316/12,792   | RR                           | 1.78 (1.42, 2.24)     | 1.63 (1.31, 2.04)     | $1.1 \times 10^{-2}$ | 0    | N/A           | N/A           | N/A            | N/A            | N/A          |
| <b>Diseases of the genitourinary system</b>                               |    |              |              |                              |                       |                       |                      |      |               |               |                |                |              |
| Endometrial hyperplasia                                                   | 23 | 405/6,038    | 17/2,089     | RR                           | 37.00 (9.30, 147.27)  | 2.70 (1.15, 6.38)     | $2.8 \times 10^{-2}$ | 1.09 | 0.38 to 44.62 | 13 (0, 26)    | 13 (0, 26)     | 87 (61, 100)   | 87 (63, 96)  |
| Irregular vaginal bleeding                                                | 9  | 151/558      | 39/289       | RR                           | 1.73 (1.10, 2.71)     | 1.78 (0.77, 4.10)     | $1.4 \times 10^{-1}$ | 0.54 | N/A           | N/A           | N/A            | N/A            | N/A          |
| <b>Injury, poisoning or certain other consequences of external causes</b> |    |              |              |                              |                       |                       |                      |      |               |               |                |                |              |
| All fracture                                                              | 30 | 2,024/22,226 | 2,546/20,962 | RR                           | 0.82 (0.76, 0.89)     | 0.72 (0.62, 0.84)     | $1.7 \times 10^{-3}$ | 0.10 | 0.58 to 0.87  | 100 (83, 100) | 100 (N/A, N/A) | 0 (N/A, N/A)   | 0 (N/A, N/A) |
| Vertebral fracture                                                        | 16 | 206/17,478   | 284/16,858   | RR                           | 0.78 (0.60, 1.01)     | 0.69 (0.50, 0.94)     | $3.3 \times 10^{-2}$ | 0    | N/A           | N/A           | N/A            | N/A            | N/A          |
| Nonvertebral fracture                                                     | 26 | 965/13,728   | 1,164/12,193 | RR                           | 0.79 (0.72, 0.87)     | 0.76 (0.62, 0.94)     | $2.5 \times 10^{-2}$ | 0.11 | 0.60 to 1.02  | 96 (0, 100)   | 100 (62, 100)  | 0 (N/A, N/A)   | 0 (N/A, N/A) |

|                                         |    |              |              |     |                      |                      |                      |      |               |              |              |               |              |
|-----------------------------------------|----|--------------|--------------|-----|----------------------|----------------------|----------------------|------|---------------|--------------|--------------|---------------|--------------|
| Hip fracture                            | 6  | 392/17,799   | 449/17,502   | RR  | 0.82 (0.69, 0.97)    | 0.85 (0.57, 1.29)    | $1.6 \times 10^{-1}$ | 0    | N/A           | N/A          | N/A          | N/A           | N/A          |
| <b>Functioning assessment</b>           |    |              |              |     |                      |                      |                      |      |               |              |              |               |              |
| Sleep quality                           | 8  | 7,964        | 7,484        | SMD | -0.09 (-0.12, -0.06) | -0.13 (-0.42, 0.16)  | $2.5 \times 10^{-1}$ | 0.18 | N/A           | N/A          | N/A          | N/A           | N/A          |
|                                         |    |              |              | RR  | 0.92 (0.89, 0.95)    | 0.89 (0.67, 1.17)    | $2.6 \times 10^{-1}$ | 0.17 | N/A           | N/A          | N/A          | N/A           | N/A          |
| Sexual function                         | 10 | 1,531        | 1,295        | SMD | -0.12 (-0.23, 0.00)  | -0.21 (-0.37, -0.05) | $1.6 \times 10^{-2}$ | 0.16 | -0.61 to 0.23 | 40 (0, 60)   | 80 (0, 100)  | 20 (0, 50)    | 0 (N/A, N/A) |
|                                         |    |              |              | RR  | 0.90 (0.81, 1.00)    | 0.82 (0.71, 0.96)    | $1.7 \times 10^{-2}$ | 0.15 | 0.57 to 1.28  | 70 (0, 90)   | 80 (30, 100) | 20 (0, 50)    | 10 (0, 70)   |
| Skeletal muscle strength                | 5  | 158          | 164          | SMD | 0.10 (-0.28, 0.48)   | -0.46 (-1.13, 0.22)  | $1.3 \times 10^{-1}$ | 0.50 | N/A           | N/A          | N/A          | N/A           | N/A          |
|                                         |    |              |              | RR  | 1.10 (0.78, 1.55)    | 0.66 (0.36, 1.22)    | $1.3 \times 10^{-1}$ | 0.45 | N/A           | N/A          | N/A          | N/A           | N/A          |
| <b>Others, not elsewhere classified</b> |    |              |              |     |                      |                      |                      |      |               |              |              |               |              |
| All-cause mortality                     | 38 | 4,274/24,707 | 4,234/23,050 | RR  | 1.01 (0.96, 1.07)    | 0.99 (0.83, 1.18)    | $7.2 \times 10^{-1}$ | 0    | N/A           | N/A          | N/A          | N/A           | N/A          |
| <b>Cardiovascular disease</b>           |    |              |              |     |                      |                      |                      |      |               |              |              |               |              |
| Incidence                               | 22 | 1,219/20,144 | 939/18,936   | RR  | 1.13 (0.99, 1.29)    | 1.29 (0.99, 1.68)    | $5.6 \times 10^{-2}$ | 0.14 | 1.02 to 1.61  | 0 (N/A, N/A) | 0 (N/A, N/A) | 100 (41, 100) | 86 (0, 100)  |
| Mortality                               | 9  | 1,249/17,142 | 1,246/16,703 | RR  | 1.02 (0.92, 1.13)    | 0.96 (0.59, 1.57)    | $6.0 \times 10^{-1}$ | 0.11 | N/A           | N/A          | N/A          | N/A           | N/A          |

Abbreviations: BMD, bone mineral density; HDL, high-density lipoprotein; LDL, low-density lipoprotein; MD, mean difference; MHT, menopausal hormone therapy; MI, myocardial infarction; N/A, not available or not applicable; PAI-1, plasminogen activator inhibitor-1; PI, prediction interval; RR, risk ratio; SMD, standardized mean difference.

<sup>a</sup> Primary prevention refers to reducing the risk of occurrence of a disease among individuals who do not have that disease.

<sup>b</sup> Incidence unless otherwise indicated.

<sup>c</sup> Point estimate with 95% confidence interval of the study with the smallest standard error in each meta-analysis.

<sup>d</sup> Point estimate with 95% confidence interval of robust random-effects meta-analysis.

<sup>e</sup> *P*-value of robust random-effects meta-analysis.

<sup>f</sup> The estimated standard deviation of true effects (for MD and SMD, *T* is on its original scale; for RR, *T* is on log RR scale).

<sup>g</sup> The middle 95% area of the estimated effect distribution. 95% PI is reported only in meta-analyses of  $\geq 10$  studies. More information about how to interpret 95% PI can be found in S3 Text (section 3).

<sup>h</sup> The proportion with 95% confidence interval of true effects ( $\theta$ ) below or above a threshold of scientific importance; complementary to 95% PI, these metrics estimate the area of the lower and upper tails of the effect distribution. For MD, null = 0; for SMD,  $q = -0.2$ , null = 0,  $q^* = 0.2$ ; for RR,  $q = 0.9$ , null = 1.0,  $q^* = 1.1$ . These metrics are reported only in meta-analyses of  $\geq 10$  studies. More information about how to interpret them can be found in S3 Text (section 3).

<sup>i</sup> In postmenopausal women without diabetes.

<sup>j</sup> In healthy postmenopausal women who used low-dose menopausal hormone therapy.

<sup>k</sup> In postmenopausal women with chronic kidney disease.

<sup>l</sup> In postmenopausal women with diabetes.

<sup>m</sup> In postmenopausal women who used menopausal hormone therapy for at least 3 months.

<sup>n</sup> In postmenopausal women with primary biliary cirrhosis.

<sup>o</sup> Gallbladder disease requiring surgery.





|                                                                           |    |             |             |           |                      |                      |                      |      |               |              |              |                |                |
|---------------------------------------------------------------------------|----|-------------|-------------|-----------|----------------------|----------------------|----------------------|------|---------------|--------------|--------------|----------------|----------------|
| Waist/hip ratio                                                           | 1  | 170         | 166         | MD        | 0.00 (-0.02, 0.02)   | N/A                  | N/A                  | N/A  | N/A           | N/A          | N/A          | N/A            | N/A            |
|                                                                           |    |             |             | RR        | 1.00 (0.82, 1.21)    | N/A                  | N/A                  | N/A  | N/A           | N/A          | N/A          | N/A            | N/A            |
| <b>Mental or behavioural disorders</b>                                    |    |             |             |           |                      |                      |                      |      |               |              |              |                |                |
| Dementia (probable)                                                       | 1  | 28/1,464    | 19/1,483    | RR        | 1.49 (0.84, 2.66)    | N/A                  | N/A                  | N/A  | N/A           | N/A          | N/A          | N/A            | N/A            |
| <b>Mental or behavioural symptoms, signs or clinical findings</b>         |    |             |             |           |                      |                      |                      |      |               |              |              |                |                |
| Depressive symptom                                                        | 3  | 337         | 327         | SMD       | 0.10 (-0.09, 0.29)   | -0.32 (-1.35, 0.71)  | 3.1×10 <sup>-1</sup> | 0.43 | N/A           | N/A          | N/A          | N/A            | N/A            |
|                                                                           |    |             |             | RR        | 1.09 (0.92, 1.30)    | 0.75 (0.29, 1.90)    | 3.1×10 <sup>-1</sup> | 0.39 | N/A           | N/A          | N/A          | N/A            | N/A            |
| <b>Diseases of the nervous system</b>                                     |    |             |             |           |                      |                      |                      |      |               |              |              |                |                |
| Cerebrovascular disease                                                   | 4  | 190/6,034   | 143/6,149   | RR        | 1.37 (1.08, 1.73)    | 1.35 (0.94, 1.92)    | 6.1×10 <sup>-2</sup> | 0    | N/A           | N/A          | N/A          | N/A            | N/A            |
| Stroke                                                                    | 3  | 289/5,934   | 259/6,044   | RR        | 1.12 (0.95, 1.33)    | 1.14 (0.46, 2.79)    | 3.2×10 <sup>-1</sup> | 0    | N/A           | N/A          | N/A          | N/A            | N/A            |
| Fatal stroke                                                              | 1  | 126/5,310   | 132/5,429   | RR        | 0.98 (0.77, 1.24)    | N/A                  | N/A                  | N/A  | N/A           | N/A          | N/A          | N/A            | N/A            |
| Non-fatal stroke                                                          | 2  | 115/5,421   | 85/5,540    | RR        | 1.37 (1.04, 1.81)    | 1.38 (0.58, 3.26)    | 1.3×10 <sup>-1</sup> | 0    | N/A           | N/A          | N/A          | N/A            | N/A            |
| Transient ischaemic attack                                                | 2  | 16/624      | 13/615      | RR        | 1.13 (0.54, 2.36)    | 1.19 (0.08, 17.66)   | 5.6×10 <sup>-1</sup> | 0    | N/A           | N/A          | N/A          | N/A            | N/A            |
| Alzheimer disease                                                         | 1  | 13/1,464    | 9/1,483     | RR        | 1.46 (0.63, 3.41)    | N/A                  | N/A                  | N/A  | N/A           | N/A          | N/A          | N/A            | N/A            |
| <b>Diseases of the circulatory system</b>                                 |    |             |             |           |                      |                      |                      |      |               |              |              |                |                |
| Coronary heart disease                                                    |    |             |             |           |                      |                      |                      |      |               |              |              |                |                |
| Incidence                                                                 | 4  | 378/5,933   | 409/6,041   | RR        | 0.94 (0.82, 1.08)    | 0.94 (0.85, 1.04)    | 8.6×10 <sup>-2</sup> | 0    | N/A           | N/A          | N/A          | N/A            | N/A            |
| Mortality                                                                 | 3  | 245/6,039   | 282/6,158   | RR        | 0.89 (0.75, 1.05)    | 0.89 (0.68, 1.16)    | 1.1×10 <sup>-1</sup> | 0    | N/A           | N/A          | N/A          | N/A            | N/A            |
| MI                                                                        | 3  | 299/5,758   | 304/5,867   | RR        | 1.01 (0.86, 1.19)    | 1.00 (0.65, 1.55)    | 9.4×10 <sup>-1</sup> | 0    | N/A           | N/A          | N/A          | N/A            | N/A            |
| Fatal MI                                                                  | 2  | 1/448       | 6/438       | RR        | 0.19 (0.02, 1.65)    | 0.23 (0.01, 5.53)    | 1.1×10 <sup>-1</sup> | 0    | N/A           | N/A          | N/A          | N/A            | N/A            |
| Non-fatal MI                                                              | 3  | 162/5,758   | 178/5,867   | RR        | 0.91 (0.73, 1.13)    | 0.93 (0.34, 2.53)    | 5.3×10 <sup>-1</sup> | 0    | N/A           | N/A          | N/A          | N/A            | N/A            |
| Any angina pectoris                                                       | 1  | 163/5,310   | 171/5,429   | RR        | 0.97 (0.79, 1.20)    | N/A                  | N/A                  | N/A  | N/A           | N/A          | N/A          | N/A            | N/A            |
| Venous thromboembolism                                                    | 7  | 183/6,819   | 169/6,681   | RR        | 1.04 (0.84, 1.29)    | 1.07 (0.41, 2.79)    | 6.0×10 <sup>-1</sup> | 0    | N/A           | N/A          | N/A          | N/A            | N/A            |
| Deep vein thrombosis                                                      | 4  | 142/6,241   | 136/6,299   | RR        | 1.04 (0.82, 1.31)    | 1.05 (0.57, 1.92)    | 5.4×10 <sup>-1</sup> | 0    | N/A           | N/A          | N/A          | N/A            | N/A            |
| Pulmonary embolism                                                        | 4  | 113/6,463   | 101/6,363   | RR        | 1.14 (0.87, 1.50)    | 1.13 (0.79, 1.61)    | 1.5×10 <sup>-1</sup> | 0    | N/A           | N/A          | N/A          | N/A            | N/A            |
| <b>Symptoms, signs or clinical findings of the circulatory system</b>     |    |             |             |           |                      |                      |                      |      |               |              |              |                |                |
| Cardiac death                                                             | 3  | 65/5,758    | 73/5,867    | RR        | 0.94 (0.65, 1.35)    | 0.90 (0.41, 1.98)    | 3.7×10 <sup>-1</sup> | 0    | N/A           | N/A          | N/A          | N/A            | N/A            |
| Coronary revascularization                                                | 2  | 406/5,421   | 398/5,540   | RR        | 1.05 (0.92, 1.19)    | 1.04 (0.62, 1.76)    | 4.9×10 <sup>-1</sup> | 0    | N/A           | N/A          | N/A          | N/A            | N/A            |
| Systolic blood pressure                                                   | 1  | 111         | 111         | MD (mmHg) | -0.63 (-3.55, 2.29)  | N/A                  | N/A                  | N/A  | N/A           | N/A          | N/A          | N/A            | N/A            |
|                                                                           |    |             |             | RR        | 0.95 (0.75, 1.21)    | N/A                  | N/A                  | N/A  | N/A           | N/A          | N/A          | N/A            | N/A            |
| Diastolic blood pressure                                                  | 1  | 111         | 111         | MD (mmHg) | 0.48 (-2.04, 3.00)   | N/A                  | N/A                  | N/A  | N/A           | N/A          | N/A          | N/A            | N/A            |
|                                                                           |    |             |             | RR        | 1.05 (0.82, 1.33)    | N/A                  | N/A                  | N/A  | N/A           | N/A          | N/A          | N/A            | N/A            |
| <b>Diseases of the digestive system</b>                                   |    |             |             |           |                      |                      |                      |      |               |              |              |                |                |
| Gallbladder disease <sup>m</sup>                                          | 3  | 200/4,416   | 117/4,514   | RR        | 1.78 (1.42, 2.24)    | 1.75 (0.40, 7.57)    | 1.3×10 <sup>-1</sup> | 0    | N/A           | N/A          | N/A          | N/A            | N/A            |
| <b>Diseases of the genitourinary system</b>                               |    |             |             |           |                      |                      |                      |      |               |              |              |                |                |
| Endometrial hyperplasia                                                   | 13 | 371/2,742   | 9/1,142     | RR        | 37.00 (9.30, 147.27) | 6.93 (2.07, 23.23)   | 7.3×10 <sup>-3</sup> | 0.79 | 1.18 to 50.68 | 0 (N/A, N/A) | 0 (N/A, N/A) | 100 (N/A, N/A) | 100 (N/A, N/A) |
| Irregular vaginal bleeding                                                | 3  | 113/311     | 24/99       | RR        | 1.73 (1.10, 2.71)    | 1.34 (0.07, 24.94)   | 5.1×10 <sup>-1</sup> | 0.32 | N/A           | N/A          | N/A          | N/A            | N/A            |
| <b>Injury, poisoning or certain other consequences of external causes</b> |    |             |             |           |                      |                      |                      |      |               |              |              |                |                |
| All fracture                                                              | 9  | 602/7,109   | 845/6,706   | RR        | 0.73 (0.65, 0.80)    | 0.70 (0.45, 1.09)    | 6.7×10 <sup>-2</sup> | 0.08 | N/A           | N/A          | N/A          | N/A            | N/A            |
| Vertebral fracture                                                        | 2  | 45/5,367    | 75/5,471    | RR        | 0.64 (0.44, 0.94)    | 0.45 (0.00, 1351.77) | 4.3×10 <sup>-1</sup> | 0.70 | N/A           | N/A          | N/A          | N/A            | N/A            |
| Nonvertebral fracture                                                     | 6  | 25/839      | 23/510      | RR        | 0.42 (0.17, 1.04)    | 0.86 (0.20, 3.67)    | 7.9×10 <sup>-1</sup> | 0.80 | N/A           | N/A          | N/A          | N/A            | N/A            |
| Hip fracture                                                              | 1  | 134/5,310   | 148/5,429   | RR        | 0.93 (0.74, 1.17)    | N/A                  | N/A                  | N/A  | N/A           | N/A          | N/A          | N/A            | N/A            |
| <b>Functioning assessment</b>                                             |    |             |             |           |                      |                      |                      |      |               |              |              |                |                |
| Sleep quality                                                             | 2  | 26          | 31          | SMD       | 0.67 (-0.05, 1.39)   | 0.02 (-8.42, 8.46)   | 9.8×10 <sup>-1</sup> | 0.86 | N/A           | N/A          | N/A          | N/A            | N/A            |
|                                                                           |    |             |             | RR        | 1.87 (0.97, 3.58)    | 1.02 (0.00, 2697.80) | 9.8×10 <sup>-1</sup> | 0.80 | N/A           | N/A          | N/A          | N/A            | N/A            |
| Sexual function                                                           | 6  | 646         | 531         | SMD       | -0.39 (-0.62, -0.15) | -0.26 (-0.51, -0.02) | 3.9×10 <sup>-2</sup> | 0.17 | N/A           | N/A          | N/A          | N/A            | N/A            |
|                                                                           |    |             |             | RR        | 0.70 (0.57, 0.87)    | 0.79 (0.63, 0.99)    | 4.3×10 <sup>-2</sup> | 0.17 | N/A           | N/A          | N/A          | N/A            | N/A            |
| <b>Others, not elsewhere classified</b>                                   |    |             |             |           |                      |                      |                      |      |               |              |              |                |                |
| All-cause mortality                                                       | 15 | 1,661/7,805 | 1,785/7,608 | RR        | 0.94 (0.89, 1.00)    | 0.95 (0.86, 1.04)    | 9.2×10 <sup>-2</sup> | 0    | N/A           | N/A          | N/A          | N/A            | N/A            |
| Cardiovascular disease                                                    |    |             |             |           |                      |                      |                      |      |               |              |              |                |                |
| Incidence                                                                 | 4  | 444/5,805   | 397/5,682   | RR        | 1.13 (0.99, 1.29)    | 1.13 (0.66, 1.93)    | 2.1×10 <sup>-1</sup> | 0    | N/A           | N/A          | N/A          | N/A            | N/A            |
| Mortality                                                                 | 3  | 549/5,502   | 578/5,579   | RR        | 0.97 (0.87, 1.08)    | 0.97 (0.95, 0.99)    | 3.9×10 <sup>-2</sup> | 0    | N/A           | N/A          | N/A          | N/A            | N/A            |

Abbreviations: ET, estrogen-alone therapy; HDL, high-density lipoprotein; LDL, low-density lipoprotein; MD, mean difference; MI, myocardial infarction; N/A, not available or not applicable; PAI-1, plasminogen activator inhibitor-1; PI, prediction interval; RR, risk ratio; SMD, standardized mean difference.

<sup>a</sup> Primary prevention refers to reducing the risk of occurrence of a disease among individuals who do not have that disease.

<sup>b</sup> Incidence unless otherwise indicated.

<sup>c</sup> Point estimate with 95% confidence interval of the study with the smallest standard error in each meta-analysis.

<sup>d</sup> Point estimate with 95% confidence interval of robust random-effects meta-analysis.

<sup>e</sup> *P*-value of robust random-effects meta-analysis.

<sup>f</sup> The estimated standard deviation of true effects (for MD and SMD, *T* is on its original scale; for RR, *T* is on log RR scale).

<sup>g</sup> The middle 95% area of the estimated effect distribution. 95% PI is reported only in meta-analyses of  $\geq 10$  studies. More information about how to interpret 95% PI can be found in S3 Text (section 3).

<sup>h</sup> The proportion with 95% confidence interval of true effects ( $\theta$ ) below or above a threshold of scientific importance; complementary to 95% PI, these metrics estimate the area of the lower and upper tails of the effect distribution. For MD, null = 0; for SMD,  $q = -0.2$ , null = 0,  $q^* = 0.2$ ; for RR,  $q = 0.9$ , null = 1.0,  $q^* = 1.1$ . These metrics are reported only in meta-analyses of  $\geq 10$  studies. More information about how to interpret them can be found in S3 Text (section 3).

<sup>i</sup> In postmenopausal women without diabetes.

<sup>j</sup> In healthy postmenopausal women who used low-dose menopausal hormone therapy.

<sup>k</sup> In postmenopausal women with chronic kidney disease.

<sup>l</sup> In postmenopausal women who used menopausal hormone therapy for at least 3 months.

<sup>m</sup> Gallbladder disease requiring surgery.



|                                                                           |    |              |              |                              |                       |                       |                      |      |               |               |                |                |                |
|---------------------------------------------------------------------------|----|--------------|--------------|------------------------------|-----------------------|-----------------------|----------------------|------|---------------|---------------|----------------|----------------|----------------|
|                                                                           |    |              |              | RR                           | 1.00 (0.74, 1.36)     | 1.00 (0.74, 1.36)     | $1.0 \times 10^{-0}$ | 0    | N/A           | N/A           | N/A            | N/A            | N/A            |
| Body mass index <sup>l</sup>                                              | 2  | 73           | 74           | MD (kg/m <sup>2</sup> )      | -0.79 (-2.81, 1.23)   | -1.05 (-6.67, 4.57)   | $2.5 \times 10^{-1}$ | 0    | N/A           | N/A           | N/A            | N/A            | N/A            |
| Body weight                                                               | 13 | 9,204        | 9,161        | MD (kg)                      | 0.30 (-0.27, 0.87)    | -0.23 (-1.35, 0.89)   | $6.2 \times 10^{-1}$ | 0.78 | -2.50 to 1.50 | N/A           | 69 (0, 100)    | 31 (0, 100)    | N/A            |
|                                                                           |    |              |              | RR                           | 1.02 (0.99, 1.05)     | 0.98 (0.90, 1.07)     | $6.1 \times 10^{-1}$ | 0.05 | 0.85 to 1.12  | 8 (0, 92)     | 69 (0, 100)    | 31 (0, 100)    | 0 (N/A, N/A)   |
| Abdominal fat                                                             | 3  | 122          | 71           | MD (% change)                | -5.80 (-11.50, -0.10) | -7.45 (-27.64, 12.75) | $1.9 \times 10^{-1}$ | 3.16 | N/A           | N/A           | N/A            | N/A            | N/A            |
| Waist circumference                                                       | 2  | 3,067        | 2,870        | MD (% change)                | -0.70 (-1.10, -0.30)  | -0.70 (-0.74, -0.66)  | $2.8 \times 10^{-3}$ | 0    | N/A           | N/A           | N/A            | N/A            | N/A            |
| Waist/hip ratio                                                           | 1  | 39           | 29           | MD                           | 0.00 (-0.03, 0.03)    | N/A                   | N/A                  | N/A  | N/A           | N/A           | N/A            | N/A            | N/A            |
|                                                                           |    |              |              | RR                           | 1.00 (0.65, 1.55)     | N/A                   | N/A                  | N/A  | N/A           | N/A           | N/A            | N/A            | N/A            |
| BMD of lumbar spine <sup>n</sup>                                          | 2  | 13           | 23           | MD (g/cm <sup>2</sup> /year) | 2.10 (-0.73, 4.93)    | 1.26 (-11.48, 14.00)  | $4.3 \times 10^{-1}$ | 0    | N/A           | N/A           | N/A            | N/A            | N/A            |
|                                                                           |    |              |              | RR                           | 1.02 (0.46, 2.23)     | 1.42 (0.01, 231.76)   | $5.4 \times 10^{-1}$ | 0.33 | N/A           | N/A           | N/A            | N/A            | N/A            |
| BMD of proximal femur <sup>n</sup>                                        | 2  | 13           | 23           | MD (g/cm <sup>2</sup> /year) | 2.30 (0.67, 3.93)     | 2.24 (0.60, 3.89)     | $3.7 \times 10^{-2}$ | 0    | N/A           | N/A           | N/A            | N/A            | N/A            |
|                                                                           |    |              |              | RR                           | 1.45 (0.66, 3.22)     | 2.16 (0.01, 845.14)   | $3.5 \times 10^{-1}$ | 0.46 | N/A           | N/A           | N/A            | N/A            | N/A            |
| <b>Mental or behavioural disorders</b>                                    |    |              |              |                              |                       |                       |                      |      |               |               |                |                |                |
| Dementia (probable)                                                       | 1  | 40/2,229     | 21/2,303     | RR                           | 1.97 (1.16, 3.33)     | N/A                   | N/A                  | N/A  | N/A           | N/A           | N/A            | N/A            | N/A            |
| <b>Mental or behavioural symptoms, signs or clinical findings</b>         |    |              |              |                              |                       |                       |                      |      |               |               |                |                |                |
| Depressive symptom                                                        | 1  | 68           | 37           | SMD                          | 0.19 (-0.28, 0.66)    | N/A                   | N/A                  | N/A  | N/A           | N/A           | N/A            | N/A            | N/A            |
|                                                                           |    |              |              | RR                           | 1.19 (0.78, 1.82)     | N/A                   | N/A                  | N/A  | N/A           | N/A           | N/A            | N/A            | N/A            |
| <b>Diseases of the nervous system</b>                                     |    |              |              |                              |                       |                       |                      |      |               |               |                |                |                |
| Cerebrovascular disease                                                   | 13 | 337/13,840   | 277/13,315   | RR                           | 1.06 (0.82, 1.35)     | 1.18 (0.83, 1.66)     | $2.1 \times 10^{-1}$ | 0    | N/A           | N/A           | N/A            | N/A            | N/A            |
| Stroke                                                                    | 11 | 477/12,026   | 389/11,175   | RR                           | 1.15 (0.99, 1.33)     | 1.17 (0.86, 1.60)     | $1.1 \times 10^{-1}$ | 0    | N/A           | N/A           | N/A            | N/A            | N/A            |
| Fatal stroke                                                              | 5  | 207/12,323   | 171/11,839   | RR                           | 1.11 (0.90, 1.37)     | 1.15 (0.31, 4.21)     | $4.3 \times 10^{-1}$ | 0    | N/A           | N/A           | N/A            | N/A            | N/A            |
| Non-fatal stroke                                                          | 7  | 173/10,367   | 125/9,964    | RR                           | 1.52 (1.10, 2.10)     | 1.34 (0.49, 3.65)     | $2.1 \times 10^{-1}$ | 0    | N/A           | N/A           | N/A            | N/A            | N/A            |
| Transient ischaemic attack                                                | 3  | 37/1,624     | 45/1,629     | RR                           | 0.80 (0.51, 1.23)     | 0.82 (0.16, 4.22)     | $3.9 \times 10^{-1}$ | 0    | N/A           | N/A           | N/A            | N/A            | N/A            |
| Alzheimer disease                                                         | 1  | 20/2,229     | 12/2,303     | RR                           | 1.72 (0.84, 3.51)     | N/A                   | N/A                  | N/A  | N/A           | N/A           | N/A            | N/A            | N/A            |
| <b>Diseases of the circulatory system</b>                                 |    |              |              |                              |                       |                       |                      |      |               |               |                |                |                |
| Coronary heart disease                                                    |    |              |              |                              |                       |                       |                      |      |               |               |                |                |                |
| Incidence                                                                 | 10 | 671/13,073   | 596/12,064   | RR                           | 1.08 (0.95, 1.22)     | 1.07 (0.92, 1.25)     | $1.2 \times 10^{-1}$ | 0    | N/A           | N/A           | N/A            | N/A            | N/A            |
| Mortality                                                                 | 2  | 310/8,576    | 286/8,174    | RR                           | 1.04 (0.88, 1.21)     | 1.03 (0.52, 2.07)     | $6.6 \times 10^{-1}$ | 0    | N/A           | N/A           | N/A            | N/A            | N/A            |
| MI                                                                        | 8  | 399/12,095   | 333/11,615   | RR                           | 1.14 (0.99, 1.32)     | 1.14 (0.70, 1.83)     | $1.9 \times 10^{-1}$ | 0    | N/A           | N/A           | N/A            | N/A            | N/A            |
| Fatal MI                                                                  | 3  | 1/338        | 2/334        | RR                           | 0.32 (0.01, 7.50)     | 0.68 (0.03, 15.56)    | $6.5 \times 10^{-1}$ | 0    | N/A           | N/A           | N/A            | N/A            | N/A            |
| Non-fatal MI                                                              | 3  | 156/10,933   | 115/10,518   | RR                           | 1.26 (0.99, 1.61)     | 1.28 (0.40, 4.07)     | $2.3 \times 10^{-1}$ | 0    | N/A           | N/A           | N/A            | N/A            | N/A            |
| Angina pectoris                                                           |    |              |              |                              |                       |                       |                      |      |               |               |                |                |                |
| Any angina                                                                | 1  | 106/8,506    | 126/8,102    | RR                           | 0.80 (0.62, 1.04)     | N/A                   | N/A                  | N/A  | N/A           | N/A           | N/A            | N/A            | N/A            |
| Unstable angina                                                           | 1  | 3/2,196      | 0/2,189      | RR                           | 6.98 (0.36, 135.01)   | N/A                   | N/A                  | N/A  | N/A           | N/A           | N/A            | N/A            | N/A            |
| Venous thromboembolism                                                    | 11 | 278/13,627   | 143/12,692   | RR                           | 1.63 (1.31, 2.03)     | 2.01 (0.60, 6.73)     | $1.2 \times 10^{-1}$ | 0.18 | 1.51 to 3.37  | 0 (N/A, N/A)  | 0 (N/A, N/A)   | 100 (N/A, N/A) | 100 (N/A, N/A) |
| Deep vein thrombosis                                                      | 5  | 252/12,181   | 171/11,776   | RR                           | 1.25 (1.02, 1.53)     | 2.51 (0.42, 14.81)    | $1.7 \times 10^{-1}$ | 0.65 | N/A           | N/A           | N/A            | N/A            | N/A            |
| Pulmonary embolism                                                        | 3  | 193/12,082   | 134/11,674   | RR                           | 1.28 (1.02, 1.61)     | 2.02 (0.22, 18.91)    | $2.7 \times 10^{-1}$ | 0.54 | N/A           | N/A           | N/A            | N/A            | N/A            |
| <b>Symptoms, signs or clinical findings of the circulatory system</b>     |    |              |              |                              |                       |                       |                      |      |               |               |                |                |                |
| Cardiac death                                                             | 1  | 39/8,506     | 34/8,102     | RR                           | 1.09 (0.69, 1.73)     | N/A                   | N/A                  | N/A  | N/A           | N/A           | N/A            | N/A            | N/A            |
| Coronary revascularization                                                | 1  | 506/8,506    | 471/8,102    | RR                           | 1.02 (0.91, 1.16)     | N/A                   | N/A                  | N/A  | N/A           | N/A           | N/A            | N/A            | N/A            |
| Systolic blood pressure                                                   | 5  | 230          | 195          | MD (mmHg)                    | 4.00 (0.26, 7.74)     | 1.09 (-7.61, 9.79)    | $7.4 \times 10^{-1}$ | 6.42 | N/A           | N/A           | N/A            | N/A            | N/A            |
|                                                                           |    |              |              | RR                           | 1.39 (1.02, 1.89)     | 1.09 (0.57, 2.11)     | $7.3 \times 10^{-1}$ | 0.49 | N/A           | N/A           | N/A            | N/A            | N/A            |
| Diastolic blood pressure                                                  | 5  | 230          | 195          | MD (mmHg)                    | 1.90 (-0.45, 4.25)    | -0.69 (-4.56, 3.19)   | $6.2 \times 10^{-1}$ | 1.65 | N/A           | N/A           | N/A            | N/A            | N/A            |
|                                                                           |    |              |              | RR                           | 0.83 (0.61, 1.12)     | 0.92 (0.66, 1.30)     | $5.4 \times 10^{-1}$ | 0.15 | N/A           | N/A           | N/A            | N/A            | N/A            |
| <b>Diseases of the digestive system</b>                                   |    |              |              |                              |                       |                       |                      |      |               |               |                |                |                |
| Gallbladder disease <sup>o</sup>                                          | 4  | 336/9,318    | 203/8,557    | RR                           | 1.64 (1.30, 2.06)     | 1.56 (0.89, 2.75)     | $6.4 \times 10^{-2}$ | 0    | N/A           | N/A           | N/A            | N/A            | N/A            |
| <b>Diseases of the genitourinary system</b>                               |    |              |              |                              |                       |                       |                      |      |               |               |                |                |                |
| Endometrial hyperplasia                                                   | 10 | 34/3,296     | 8/947        | RR                           | 2.16 (0.49, 9.44)     | 0.69 (0.22, 2.13)     | $4.5 \times 10^{-1}$ | 0    | N/A           | N/A           | N/A            | N/A            | N/A            |
| Irregular vaginal bleeding                                                | 6  | 38/247       | 15/190       | RR                           | 0.50 (0.17, 1.49)     | 2.73 (0.60, 12.31)    | $1.4 \times 10^{-1}$ | 0.96 | N/A           | N/A           | N/A            | N/A            | N/A            |
| <b>Injury, poisoning or certain other consequences of external causes</b> |    |              |              |                              |                       |                       |                      |      |               |               |                |                |                |
| All fracture                                                              | 17 | 1,353/13,634 | 1,645/13,405 | RR                           | 0.82 (0.76, 0.89)     | 0.69 (0.53, 0.89)     | $1.1 \times 10^{-2}$ | 0.17 | 0.49 to 0.96  | 100 (41, 100) | 100 (N/A, N/A) | 0 (N/A, N/A)   | 0 (N/A, N/A)   |
| Vertebral fracture                                                        | 10 | 147/10,461   | 200/10,358   | RR                           | 0.78 (0.60, 1.01)     | 0.68 (0.34, 1.37)     | $1.4 \times 10^{-1}$ | 0    | N/A           | N/A           | N/A            | N/A            | N/A            |
| Nonvertebral fracture                                                     | 17 | 891/11,593   | 1,108/11,018 | RR                           | 0.79 (0.72, 0.87)     | 0.76 (0.56, 1.02)     | $5.8 \times 10^{-2}$ | 0.11 | 0.57 to 0.91  | 100 (0, 100)  | 100 (82, 82)   | 0 (N/A, N/A)   | 0 (N/A, N/A)   |

|                                         |    |              |              |     |                      |                     |                      |      |              |              |              |              |             |
|-----------------------------------------|----|--------------|--------------|-----|----------------------|---------------------|----------------------|------|--------------|--------------|--------------|--------------|-------------|
| Hip fracture                            | 4  | 249/12,152   | 287/11,746   | RR  | 0.82 (0.69, 0.97)    | 0.83 (0.45, 1.54)   | $1.7 \times 10^{-1}$ | 0    | N/A          | N/A          | N/A          | N/A          | N/A         |
| <b>Functioning assessment</b>           |    |              |              |     |                      |                     |                      |      |              |              |              |              |             |
| Sleep quality                           | 3  | 7,660        | 7,328        | SMD | -0.09 (-0.12, -0.06) | -0.12 (-1.39, 1.15) | $4.7 \times 10^{-1}$ | 0.09 | N/A          | N/A          | N/A          | N/A          | N/A         |
|                                         |    |              |              | RR  | 0.92 (0.89, 0.95)    | 0.86 (0.21, 3.50)   | $4.9 \times 10^{-1}$ | 0.13 | N/A          | N/A          | N/A          | N/A          | N/A         |
| Sexual function                         | 3  | 668          | 646          | SMD | -0.12 (-0.23, 0.00)  | -0.09 (-0.71, 0.53) | $3.8 \times 10^{-1}$ | 0.02 | N/A          | N/A          | N/A          | N/A          | N/A         |
|                                         |    |              |              | RR  | 0.90 (0.81, 1.00)    | 0.92 (0.52, 1.64)   | $4.0 \times 10^{-1}$ | 0.03 | N/A          | N/A          | N/A          | N/A          | N/A         |
| Skeletal muscle strength                | 4  | 104          | 110          | SMD | -0.48 (-0.87, -0.08) | -0.63 (-1.40, 0.15) | $8.2 \times 10^{-2}$ | 0.39 | N/A          | N/A          | N/A          | N/A          | N/A         |
|                                         |    |              |              | RR  | 0.65 (0.46, 0.93)    | 0.57 (0.28, 1.15)   | $8.2 \times 10^{-2}$ | 0.36 | N/A          | N/A          | N/A          | N/A          | N/A         |
| <b>Others, not elsewhere classified</b> |    |              |              |     |                      |                     |                      |      |              |              |              |              |             |
| All-cause mortality                     | 16 | 2,536/14,949 | 2,380/13,891 | RR  | 1.01 (0.96, 1.07)    | 1.02 (0.82, 1.26)   | $4.9 \times 10^{-1}$ | 0    | N/A          | N/A          | N/A          | N/A          | N/A         |
| Cardiovascular disease                  |    |              |              |     |                      |                     |                      |      |              |              |              |              |             |
| Incidence                               | 12 | 735/12,419   | 516/11,862   | RR  | 1.54 (1.33, 1.78)    | 1.38 (0.87, 2.21)   | $1.1 \times 10^{-1}$ | 0.21 | 0.89 to 2.04 | 0 (N/A, N/A) | 0 (N/A, N/A) | 100 (0, 100) | 83 (0, 100) |
| Mortality                               | 3  | 692/10,917   | 644/10,397   | RR  | 1.02 (0.92, 1.13)    | 1.02 (0.49, 2.10)   | $7.8 \times 10^{-1}$ | 0    | N/A          | N/A          | N/A          | N/A          | N/A         |

Abbreviations: BMD, bone mineral density; EPT, estrogen plus progestin therapy; HDL, high-density lipoprotein; LDL, low-density lipoprotein; MD, mean difference; MI, myocardial infarction; N/A, not available or not applicable; PAI-1, plasminogen activator inhibitor-1; PI, prediction interval; RR, risk ratio; SMD, standardized mean difference.

<sup>a</sup> Primary prevention refers to reducing the risk of occurrence of a disease among individuals who do not have that disease.

<sup>b</sup> Incidence unless otherwise indicated.

<sup>c</sup> Point estimate with 95% confidence interval of the study with the smallest standard error in each meta-analysis.

<sup>d</sup> Point estimate with 95% confidence interval of robust random-effects meta-analysis.

<sup>e</sup> *P*-value of robust random-effects meta-analysis.

<sup>f</sup> The estimated standard deviation of true effects (for MD and SMD, *T* is on its original scale; for RR, *T* is on log RR scale).

<sup>g</sup> The middle 95% area of the estimated effect distribution. 95% PI is reported only in meta-analyses of  $\geq 10$  studies. More information about how to interpret 95% PI can be found in S3 Text (section 3).

<sup>h</sup> The proportion with 95% confidence interval of true effects ( $\theta$ ) below or above a threshold of scientific importance; complementary to 95% PI, these metrics estimate the area of the lower and upper tails of the effect distribution. For MD, null = 0; for SMD,  $q = -0.2$ , null = 0,  $q^* = 0.2$ ; for RR,  $q = 0.9$ , null = 1.0,  $q^* = 1.1$ . These metrics are reported only in meta-analyses of  $\geq 10$  studies. More information about how to interpret them can be found in S3 Text (section 3).

<sup>i</sup> In postmenopausal women without diabetes.

<sup>j</sup> In healthy postmenopausal women who used low-dose menopausal hormone therapy.

<sup>k</sup> In postmenopausal women with chronic kidney disease.

<sup>l</sup> In postmenopausal women with diabetes.

<sup>m</sup> In postmenopausal women who used menopausal hormone therapy for at least 3 months.

<sup>n</sup> In postmenopausal women with primary biliary cirrhosis.

<sup>o</sup> Gallbladder disease requiring surgery.

Table I. Any Menopausal Hormone Therapy for Secondary Prevention of Multiple Outcomes in Included Systematic Reviews and Meta-Analyses of Randomized Controlled Trials<sup>a</sup>

| Outcome <sup>b</sup>                                                                        | No. of Trials | No. of Events/Total No. |           | Metric (unit)  | Most Precise Study <sup>c</sup> | Summary Effect <sup>d</sup> | P-Value <sup>e</sup> | T <sup>f</sup> | 95% PI <sup>g</sup> | Proportion of True Effects ( $\theta$ ) Below/Above a Threshold (%) <sup>h</sup> |                                 |                                 |                         |
|---------------------------------------------------------------------------------------------|---------------|-------------------------|-----------|----------------|---------------------------------|-----------------------------|----------------------|----------------|---------------------|----------------------------------------------------------------------------------|---------------------------------|---------------------------------|-------------------------|
|                                                                                             |               | Any MHT                 | Control   |                |                                 |                             |                      |                |                     | $\hat{P}(\theta < q)$                                                            | $\hat{P}(\theta < \text{null})$ | $\hat{P}(\theta > \text{null})$ | $\hat{P}(\theta > q^*)$ |
| <b>Neoplasms</b>                                                                            |               |                         |           |                |                                 |                             |                      |                |                     |                                                                                  |                                 |                                 |                         |
| Breast cancer recurrence                                                                    | 4             | 103/494                 | 70/503    | RR             | 1.26 (0.92, 1.74)               | 1.51 (0.32, 7.12)           | $2.8 \times 10^{-1}$ | 0.26           | N/A                 | N/A                                                                              | N/A                             | N/A                             | N/A                     |
| Ovarian cancer OS                                                                           | 1             | 32/59                   | 41/66     | RR             | 0.87 (0.65, 1.18)               | N/A                         | N/A                  | N/A            | N/A                 | N/A                                                                              | N/A                             | N/A                             | N/A                     |
| <b>Symptoms, signs or clinical findings of endocrine, nutritional or metabolic diseases</b> |               |                         |           |                |                                 |                             |                      |                |                     |                                                                                  |                                 |                                 |                         |
| Fasting glucose                                                                             | 5             | 465                     | 431       | MD (mmol/L)    | -0.36 (-0.85, 0.13)             | -0.63 (-2.22, 0.97)         | $2.1 \times 10^{-1}$ | 0.17           | N/A                 | N/A                                                                              | N/A                             | N/A                             | N/A                     |
| Hemoglobin A1c                                                                              | 4             | 84                      | 78        | MD (%)         | -0.51 (-1.01, -0.01)            | -0.47 (-0.72, -0.23)        | $1.4 \times 10^{-2}$ | 0              | N/A                 | N/A                                                                              | N/A                             | N/A                             | N/A                     |
| <b>Mental or behavioural symptoms, signs or clinical findings</b>                           |               |                         |           |                |                                 |                             |                      |                |                     |                                                                                  |                                 |                                 |                         |
| Depressive symptom                                                                          | 5             | 139                     | 133       | SMD            | -0.19 (-0.64, 0.26)             | 0.16 (-1.62, 1.94)          | $8.1 \times 10^{-1}$ | 1.08           | N/A                 | N/A                                                                              | N/A                             | N/A                             | N/A                     |
|                                                                                             |               |                         |           | RR             | 0.84 (0.56, 1.27)               | 1.16 (0.23, 5.82)           | $8.1 \times 10^{-1}$ | 0.98           | N/A                 | N/A                                                                              | N/A                             | N/A                             | N/A                     |
| <b>Diseases of the nervous system</b>                                                       |               |                         |           |                |                                 |                             |                      |                |                     |                                                                                  |                                 |                                 |                         |
| Cerebrovascular disease                                                                     | 2             | 89/371                  | 76/366    | RR             | 1.20 (0.91, 1.57)               | 0.63 (0.00, $\infty$ )      | $7.3 \times 10^{-1}$ | 1.19           | N/A                 | N/A                                                                              | N/A                             | N/A                             | N/A                     |
| Stroke                                                                                      | 2             | 63/371                  | 60/366    | RR             | 1.09 (0.79, 1.51)               | 0.61 (0.00, $\infty$ )      | $7.0 \times 10^{-1}$ | 1.10           | N/A                 | N/A                                                                              | N/A                             | N/A                             | N/A                     |
| Fatal stroke                                                                                | 2             | 12/371                  | 8/366     | RR             | 2.91 (0.95, 8.93)               | 0.82 (0.00, $\infty$ )      | $9.2 \times 10^{-1}$ | 1.91           | N/A                 | N/A                                                                              | N/A                             | N/A                             | N/A                     |
| Non-fatal stroke                                                                            | 1             | 51/337                  | 52/327    | RR             | 0.95 (0.67, 1.36)               | N/A                         | N/A                  | N/A            | N/A                 | N/A                                                                              | N/A                             | N/A                             | N/A                     |
| Transient ischaemic attack                                                                  | 1             | 30/337                  | 25/327    | RR             | 1.16 (0.70, 1.94)               | N/A                         | N/A                  | N/A            | N/A                 | N/A                                                                              | N/A                             | N/A                             | N/A                     |
| <b>Diseases of the circulatory system</b>                                                   |               |                         |           |                |                                 |                             |                      |                |                     |                                                                                  |                                 |                                 |                         |
| Coronary heart disease                                                                      |               |                         |           |                |                                 |                             |                      |                |                     |                                                                                  |                                 |                                 |                         |
| Incidence                                                                                   | 8             | 459/2,590               | 443/2,455 | RR             | 0.94 (0.81, 1.09)               | 0.97 (0.76, 1.24)           | $6.5 \times 10^{-1}$ | 0              | N/A                 | N/A                                                                              | N/A                             | N/A                             | N/A                     |
| Mortality                                                                                   | 4             | 161/2,200               | 156/2,099 | RR             | 1.08 (0.86, 1.37)               | 1.02 (0.26, 4.05)           | $9.3 \times 10^{-1}$ | 0              | N/A                 | N/A                                                                              | N/A                             | N/A                             | N/A                     |
| MI                                                                                          | 9             | 207/2,630               | 215/2,498 | RR             | 0.93 (0.75, 1.17)               | 0.93 (0.76, 1.15)           | $2.2 \times 10^{-1}$ | 0              | N/A                 | N/A                                                                              | N/A                             | N/A                             | N/A                     |
| Fatal MI                                                                                    | 5             | 28/2,197                | 32/2,070  | RR             | 1.19 (0.61, 2.30)               | 0.84 (0.08, 9.49)           | $7.2 \times 10^{-1}$ | 0              | N/A                 | N/A                                                                              | N/A                             | N/A                             | N/A                     |
| Non-fatal MI                                                                                | 5             | 174/2,441               | 175/2,326 | RR             | 0.90 (0.71, 1.14)               | 0.96 (0.43, 2.15)           | $7.7 \times 10^{-1}$ | 0              | N/A                 | N/A                                                                              | N/A                             | N/A                             | N/A                     |
| Angina pectoris                                                                             |               |                         |           |                |                                 |                             |                      |                |                     |                                                                                  |                                 |                                 |                         |
| Any angina                                                                                  | 3             | 154/1,624               | 152/1,531 | RR             | 0.91 (0.71, 1.17)               | 0.91 (0.64, 1.29)           | $2.4 \times 10^{-1}$ | 0              | N/A                 | N/A                                                                              | N/A                             | N/A                             | N/A                     |
| Unstable angina                                                                             | 4             | 184/1,758               | 171/1,629 | RR             | 0.88 (0.68, 1.14)               | 0.97 (0.51, 1.83)           | $8.5 \times 10^{-1}$ | 0.13           | N/A                 | N/A                                                                              | N/A                             | N/A                             | N/A                     |
| Venous thromboembolism                                                                      | 1             | 8/71                    | 1/69      | RR             | 7.77 (1.00, 60.53)              | N/A                         | N/A                  | N/A            | N/A                 | N/A                                                                              | N/A                             | N/A                             | N/A                     |
| Deep vein thrombosis                                                                        | 1             | 4/71                    | 0/69      | RR             | 8.75 (0.48, 159.53)             | N/A                         | N/A                  | N/A            | N/A                 | N/A                                                                              | N/A                             | N/A                             | N/A                     |
| Pulmonary embolism                                                                          | 1             | 3/71                    | 1/69      | RR             | 2.92 (0.31, 27.35)              | N/A                         | N/A                  | N/A            | N/A                 | N/A                                                                              | N/A                             | N/A                             | N/A                     |
| <b>Symptoms, signs or clinical findings of the circulatory system</b>                       |               |                         |           |                |                                 |                             |                      |                |                     |                                                                                  |                                 |                                 |                         |
| Cardiac death                                                                               | 4             | 105/2,307               | 98/2,205  | RR             | 1.19 (0.85, 1.67)               | 1.04 (0.33, 3.30)           | $8.7 \times 10^{-1}$ | 0.05           | N/A                 | N/A                                                                              | N/A                             | N/A                             | N/A                     |
| Coronary revascularization                                                                  | 3             | 313/1,624               | 312/1,531 | RR             | 0.93 (0.80, 1.08)               | 0.98 (0.29, 3.33)           | $8.9 \times 10^{-1}$ | 0.29           | N/A                 | N/A                                                                              | N/A                             | N/A                             | N/A                     |
| <b>Diseases of the genitourinary system</b>                                                 |               |                         |           |                |                                 |                             |                      |                |                     |                                                                                  |                                 |                                 |                         |
| RUTI                                                                                        | 3             | 54/139                  | 89/134    | RR             | 0.64 (0.47, 0.86)               | 0.58 (0.11, 2.99)           | $2.9 \times 10^{-1}$ | 0.51           | N/A                 | N/A                                                                              | N/A                             | N/A                             | N/A                     |
| Vaginal atrophy                                                                             | 5             | 151/999                 | 605/904   | RR             | 0.22 (0.19, 0.26)               | 0.31 (0.12, 0.81)           | $3.0 \times 10^{-2}$ | 0.55           | N/A                 | N/A                                                                              | N/A                             | N/A                             | N/A                     |
| <b>Symptoms, signs or clinical findings of the genitourinary system</b>                     |               |                         |           |                |                                 |                             |                      |                |                     |                                                                                  |                                 |                                 |                         |
| Vasomotor symptom                                                                           | 9             | 791                     | 313       | MD (freq/week) | -11.79 (-19.57, -4.01)          | -17.92 (-23.80, -12.04)     | $1.4 \times 10^{-4}$ | 5.43           | N/A                 | N/A                                                                              | N/A                             | N/A                             | N/A                     |
|                                                                                             |               |                         |           | RR             | 0.44 (0.34, 0.57)               | 0.43 (0.33, 0.57)           | $1.3 \times 10^{-4}$ | 0.26           | N/A                 | N/A                                                                              | N/A                             | N/A                             | N/A                     |
| Vasomotor symptom severity                                                                  | 7             | 299                     | 204       | SMD            | -1.10 (-1.53, -0.68)            | -1.36 (-1.95, -0.76)        | $1.5 \times 10^{-3}$ | 0.54           | N/A                 | N/A                                                                              | N/A                             | N/A                             | N/A                     |
|                                                                                             |               |                         |           | RR             | 0.36 (0.25, 0.54)               | 0.29 (0.17, 0.50)           | $1.5 \times 10^{-3}$ | 0.50           | N/A                 | N/A                                                                              | N/A                             | N/A                             | N/A                     |
| Urinary incontinence                                                                        | 13            | N/A/8,500               | N/A/8,499 | RR             | 1.09 (1.02, 1.17)               | 0.82 (0.62, 1.09)           | $1.5 \times 10^{-1}$ | 0.28           | 0.36 to 1.94        | 77 (0, 92)                                                                       | 77 (38, 92)                     | 23 (0, 46)                      | 15 (0, 31)              |
| <b>Functioning assessment</b>                                                               |               |                         |           |                |                                 |                             |                      |                |                     |                                                                                  |                                 |                                 |                         |
| Sleep quality                                                                               | 2             | 33                      | 32        | SMD            | 0.27 (-0.41, 0.96)              | 0.00 (-3.49, 3.50)          | $9.9 \times 10^{-1}$ | 0.16           | N/A                 | N/A                                                                              | N/A                             | N/A                             | N/A                     |
|                                                                                             |               |                         |           | RR             | 1.29 (0.69, 2.40)               | 1.00 (0.04, 25.90)          | $9.9 \times 10^{-1}$ | 0.17           | N/A                 | N/A                                                                              | N/A                             | N/A                             | N/A                     |
| <b>Others, not elsewhere classified</b>                                                     |               |                         |           |                |                                 |                             |                      |                |                     |                                                                                  |                                 |                                 |                         |
| Cardiovascular disease                                                                      |               |                         |           |                |                                 |                             |                      |                |                     |                                                                                  |                                 |                                 |                         |
| Incidence                                                                                   | 11            | 791/3,032               | 701/2,890 | RR             | 1.03 (0.92, 1.15)               | 1.08 (0.94, 1.25)           | $1.8 \times 10^{-1}$ | 0.07           | 0.94 to 1.27        | 0 (N/A, N/A)                                                                     | 18 (0, 100)                     | 82 (0, 100)                     | 45 (0, 100)             |
| Mortality                                                                                   | 9             | 220/2,811               | 203/2,669 | RR             | 1.11 (0.89, 1.37)               | 1.06 (0.62, 1.80)           | $6.0 \times 10^{-1}$ | 0              | N/A                 | N/A                                                                              | N/A                             | N/A                             | N/A                     |

Abbreviations: freq, frequency; MD, mean difference; MHT, menopausal hormone therapy; MI, myocardial infarction; N/A, not available or not applicable; OS, overall survival; PI, prediction interval; RR, risk ratio; RUTI, recurrent urinary tract infection; SMD, standardized mean difference.

<sup>a</sup> Secondary prevention refers to reducing the risk of recurrence of a disease among individuals who already have that disease.<sup>b</sup> Incidence unless otherwise indicated.<sup>c</sup> Point estimate with 95% confidence interval of the study with the smallest standard error in each meta-analysis.

<sup>d</sup> Point estimate with 95% confidence interval of robust random-effects meta-analysis.

<sup>e</sup> *P*-value of robust random-effects meta-analysis.

<sup>f</sup> The estimated standard deviation of true effects (for MD and SMD, *T* is on its original scale; for RR, *T* is on log RR scale).

<sup>g</sup> The middle 95% area of the estimated effect distribution. 95% PI is reported only in meta-analyses of  $\geq 10$  studies. More information about how to interpret 95% PI can be found in S3 Text (section 3).

<sup>h</sup> The proportion with 95% confidence interval of true effects ( $\theta$ ) below or above a threshold of scientific importance; complementary to 95% PI, these metrics estimate the area of the lower and upper tails of the effect distribution. For MD, null = 0; for SMD,  $q = -0.2$ , null = 0,  $q^* = 0.2$ ; for RR,  $q = 0.9$ , null = 1.0,  $q^* = 1.1$ . These metrics are reported only in meta-analyses of  $\geq 10$  studies. More information about how to interpret them can be found in S3 Text (section 3).

**Table J. Estrogen-Alone Therapy for Secondary Prevention of Multiple Outcomes in Included Systematic Reviews and Meta-Analyses of Randomized Controlled Trials<sup>a</sup>**

| Outcome <sup>b</sup>                                                    | No. of Trials | No. of Events/Total No. |           | Metric (unit)  | Most Precise Study <sup>c</sup> | Summary Effect <sup>d</sup> | P-Value <sup>e</sup> | T <sup>f</sup> | 95% PI <sup>g</sup> | Proportion of True Effects ( $\theta$ ) Below/Above a Threshold (%) <sup>h</sup> |                                 |                                 |                         |
|-------------------------------------------------------------------------|---------------|-------------------------|-----------|----------------|---------------------------------|-----------------------------|----------------------|----------------|---------------------|----------------------------------------------------------------------------------|---------------------------------|---------------------------------|-------------------------|
|                                                                         |               | ET                      | Control   |                |                                 |                             |                      |                |                     | $\hat{P}(\theta < q)$                                                            | $\hat{P}(\theta < \text{null})$ | $\hat{P}(\theta > \text{null})$ | $\hat{P}(\theta > q^*)$ |
| <b>Neoplasms</b>                                                        |               |                         |           |                |                                 |                             |                      |                |                     |                                                                                  |                                 |                                 |                         |
| Breast cancer recurrence                                                | 1             | 2/34                    | 4/43      | RR             | 0.63 (0.12, 3.25)               | N/A                         | N/A                  | N/A            | N/A                 | N/A                                                                              | N/A                             | N/A                             | N/A                     |
| Ovarian cancer OS                                                       | 1             | 32/59                   | 41/66     | RR             | 0.87 (0.65, 1.18)               | N/A                         | N/A                  | N/A            | N/A                 | N/A                                                                              | N/A                             | N/A                             | N/A                     |
| <b>Mental or behavioural symptoms, signs or clinical findings</b>       |               |                         |           |                |                                 |                             |                      |                |                     |                                                                                  |                                 |                                 |                         |
| Depressive symptom                                                      | 4             | 100                     | 94        | SMD            | 0.38 (-0.15, 0.91)              | 0.27 (-2.42, 2.95)          | $7.7 \times 10^{-1}$ | 1.36           | N/A                 | N/A                                                                              | N/A                             | N/A                             | N/A                     |
|                                                                         |               |                         |           | RR             | 1.41 (0.87, 2.28)               | 1.27 (0.11, 14.49)          | $7.7 \times 10^{-1}$ | 1.23           | N/A                 | N/A                                                                              | N/A                             | N/A                             | N/A                     |
| <b>Diseases of the nervous system</b>                                   |               |                         |           |                |                                 |                             |                      |                |                     |                                                                                  |                                 |                                 |                         |
| Cerebrovascular disease                                                 | 2             | 89/371                  | 76/366    | RR             | 1.20 (0.91, 1.57)               | 0.63 (0.00, $\infty$ )      | $7.3 \times 10^{-1}$ | 1.19           | N/A                 | N/A                                                                              | N/A                             | N/A                             | N/A                     |
| Stroke                                                                  | 2             | 63/371                  | 60/366    | RR             | 1.09 (0.79, 1.51)               | 0.61 (0.00, $\infty$ )      | $7.0 \times 10^{-1}$ | 1.10           | N/A                 | N/A                                                                              | N/A                             | N/A                             | N/A                     |
| Fatal stroke                                                            | 2             | 12/371                  | 8/366     | RR             | 2.91 (0.95, 8.93)               | 0.82 (0.00, $\infty$ )      | $9.2 \times 10^{-1}$ | 1.91           | N/A                 | N/A                                                                              | N/A                             | N/A                             | N/A                     |
| Non-fatal stroke                                                        | 1             | 51/337                  | 52/327    | RR             | 0.95 (0.67, 1.36)               | N/A                         | N/A                  | N/A            | N/A                 | N/A                                                                              | N/A                             | N/A                             | N/A                     |
| <b>Diseases of the circulatory system</b>                               |               |                         |           |                |                                 |                             |                      |                |                     |                                                                                  |                                 |                                 |                         |
| Coronary heart disease                                                  |               |                         |           |                |                                 |                             |                      |                |                     |                                                                                  |                                 |                                 |                         |
| Incidence                                                               | 2             | 87/613                  | 91/609    | RR             | 1.00 (0.72, 1.39)               | 0.95 (0.43, 2.12)           | $5.9 \times 10^{-1}$ | 0              | N/A                 | N/A                                                                              | N/A                             | N/A                             | N/A                     |
| Mortality                                                               | 3             | 26/673                  | 34/671    | RR             | 0.69 (0.40, 1.18)               | 0.76 (0.08, 7.17)           | $4.2 \times 10^{-1}$ | 0              | N/A                 | N/A                                                                              | N/A                             | N/A                             | N/A                     |
| MI                                                                      | 2             | 54/613                  | 52/609    | RR             | 1.05 (0.71, 1.55)               | 1.03 (0.57, 1.85)           | $6.3 \times 10^{-1}$ | 0              | N/A                 | N/A                                                                              | N/A                             | N/A                             | N/A                     |
| Fatal MI                                                                | 2             | 7/613                   | 14/609    | RR             | 0.45 (0.17, 1.18)               | 0.50 (0.02, 13.61)          | $2.3 \times 10^{-1}$ | 0              | N/A                 | N/A                                                                              | N/A                             | N/A                             | N/A                     |
| Non-fatal MI                                                            | 2             | 47/613                  | 38/609    | RR             | 1.30 (0.83, 2.04)               | 1.23 (0.23, 6.61)           | $3.6 \times 10^{-1}$ | 0              | N/A                 | N/A                                                                              | N/A                             | N/A                             | N/A                     |
| Angina pectoris                                                         |               |                         |           |                |                                 |                             |                      |                |                     |                                                                                  |                                 |                                 |                         |
| Any angina                                                              | 1             | 18/100                  | 22/105    | RR             | 0.86 (0.49, 1.50)               | N/A                         | N/A                  | N/A            | N/A                 | N/A                                                                              | N/A                             | N/A                             | N/A                     |
| Unstable angina                                                         | 1             | 18/100                  | 22/105    | RR             | 0.86 (0.49, 1.50)               | N/A                         | N/A                  | N/A            | N/A                 | N/A                                                                              | N/A                             | N/A                             | N/A                     |
| <b>Symptoms, signs or clinical findings of the circulatory system</b>   |               |                         |           |                |                                 |                             |                      |                |                     |                                                                                  |                                 |                                 |                         |
| Cardiac death                                                           | 2             | 25/613                  | 33/609    | RR             | 0.69 (0.40, 1.18)               | 0.75 (0.04, 14.13)          | $4.3 \times 10^{-1}$ | 0              | N/A                 | N/A                                                                              | N/A                             | N/A                             | N/A                     |
| Coronary revascularization                                              | 1             | 18/100                  | 24/105    | RR             | 0.79 (0.46, 1.36)               | N/A                         | N/A                  | N/A            | N/A                 | N/A                                                                              | N/A                             | N/A                             | N/A                     |
| <b>Diseases of the genitourinary system</b>                             |               |                         |           |                |                                 |                             |                      |                |                     |                                                                                  |                                 |                                 |                         |
| RUTI                                                                    | 3             | 54/139                  | 89/134    | RR             | 0.64 (0.47, 0.86)               | 0.58 (0.11, 2.99)           | $2.9 \times 10^{-1}$ | 0.51           | N/A                 | N/A                                                                              | N/A                             | N/A                             | N/A                     |
| Vaginal atrophy                                                         | 5             | 151/999                 | 605/904   | RR             | 0.22 (0.19, 0.26)               | 0.31 (0.12, 0.81)           | $3.0 \times 10^{-2}$ | 0.55           | N/A                 | N/A                                                                              | N/A                             | N/A                             | N/A                     |
| <b>Symptoms, signs or clinical findings of the genitourinary system</b> |               |                         |           |                |                                 |                             |                      |                |                     |                                                                                  |                                 |                                 |                         |
| Vasomotor symptom                                                       | 3             | 269                     | 96        | MD (freq/week) | -15.00 (-23.28, -6.72)          | -14.78 (-22.11, -7.46)      | $1.6 \times 10^{-2}$ | 0              | N/A                 | N/A                                                                              | N/A                             | N/A                             | N/A                     |
|                                                                         |               |                         |           | RR             | 0.58 (0.44, 0.76)               | 0.57 (0.40, 0.80)           | $2.6 \times 10^{-2}$ | 0              | N/A                 | N/A                                                                              | N/A                             | N/A                             |                         |
| Vasomotor symptom severity                                              | 1             | 43                      | 40        | SMD            | -0.55 (-0.99, -0.11)            | N/A                         | N/A                  | N/A            | N/A                 | N/A                                                                              | N/A                             | N/A                             |                         |
|                                                                         |               |                         |           | RR             | 0.60 (0.41, 0.90)               | N/A                         | N/A                  | N/A            | N/A                 | N/A                                                                              | N/A                             |                                 |                         |
| Urinary incontinence                                                    | 10            | N/A/3,173               | N/A/3,191 | RR             | 1.59 (1.39, 1.82)               | 0.68 (0.47, 0.99)           | $4.4 \times 10^{-2}$ | 0.49           | 0.23 to 2.34        | 90 (20, 100)                                                                     | 90 (50, 100)                    | 10 (0, 30)                      | 10 (0, 30)              |
| <b>Functioning assessment</b>                                           |               |                         |           |                |                                 |                             |                      |                |                     |                                                                                  |                                 |                                 |                         |
| Sleep quality                                                           | 1             | 17                      | 16        | SMD            | 0.27 (-0.41, 0.96)              | N/A                         | N/A                  | N/A            | N/A                 | N/A                                                                              | N/A                             | N/A                             | N/A                     |
|                                                                         |               |                         |           | RR             | 1.29 (0.69, 2.40)               | N/A                         | N/A                  | N/A            | N/A                 | N/A                                                                              | N/A                             |                                 |                         |
| <b>Others, not elsewhere classified</b>                                 |               |                         |           |                |                                 |                             |                      |                |                     |                                                                                  |                                 |                                 |                         |
| Cardiovascular disease                                                  |               |                         |           |                |                                 |                             |                      |                |                     |                                                                                  |                                 |                                 |                         |
| Incidence                                                               | 4             | 229/984                 | 211/975   | RR             | 1.15 (0.90, 1.47)               | 1.08 (0.89, 1.32)           | $2.0 \times 10^{-1}$ | 0              | N/A                 | N/A                                                                              | N/A                             | N/A                             | N/A                     |
| Mortality                                                               | 3             | 48/950                  | 50/936    | RR             | 0.69 (0.40, 1.18)               | 0.97 (0.15, 6.20)           | $9.2 \times 10^{-1}$ | 0.22           | N/A                 | N/A                                                                              | N/A                             | N/A                             | N/A                     |

Abbreviations: ET, estrogen-alone therapy; freq, frequency; MD, mean difference; MI, myocardial infarction; N/A, not available or not applicable; OS, overall survival; PI, prediction interval; RR, risk ratio; RUTI, recurrent urinary tract infection; SMD, standardized mean difference.

<sup>a</sup> Secondary prevention refers to reducing the risk of recurrence of a disease among individuals who already have that disease.

<sup>b</sup> Incidence unless otherwise indicated.

<sup>c</sup> Point estimate with 95% confidence interval of the study with the smallest standard error in each meta-analysis.

<sup>d</sup> Point estimate with 95% confidence interval of robust random-effects meta-analysis.

<sup>e</sup> P-value of robust random-effects meta-analysis.

<sup>f</sup> The estimated standard deviation of true effects (for MD and SMD, T is on its original scale; for RR, T is on log RR scale).

<sup>g</sup> The middle 95% area of the estimated effect distribution. 95% PI is reported only in meta-analyses of  $\geq 10$  studies. More information about how to interpret 95% PI can be found in S3 Text (section 3).

<sup>h</sup> The proportion with 95% confidence interval of true effects ( $\theta$ ) below or above a threshold of scientific importance; complementary to 95% PI, these metrics estimate the area of the lower and upper tails of the effect distribution. For MD, null = 0; for SMD,  $q = -0.2$ , null = 0,  $q^* = 0.2$ ; for RR,  $q = 0.9$ , null = 1.0,  $q^* = 1.1$ . These metrics are reported only in meta-analyses of  $\geq 10$  studies. More information about how to interpret them can be found in S3 Text (section 3).



**Table K. Estrogen Plus Progestin Therapy for Secondary Prevention of Multiple Outcomes in Included Systematic Reviews and Meta-Analyses of Randomized Controlled Trials<sup>a</sup>**

| Outcome <sup>b</sup>                                                                        | No. of Trials | No. of Events/Total No. |           | Metric (unit)  | Most Precise Study <sup>c</sup> | Summary Effect <sup>d</sup> | P-Value <sup>e</sup> | T <sup>f</sup> | 95% PI <sup>g</sup> | Proportion of True Effects ( $\theta$ ) Below/Above a Threshold (%) <sup>h</sup> |                                 |                                 |                         |
|---------------------------------------------------------------------------------------------|---------------|-------------------------|-----------|----------------|---------------------------------|-----------------------------|----------------------|----------------|---------------------|----------------------------------------------------------------------------------|---------------------------------|---------------------------------|-------------------------|
|                                                                                             |               | EPT                     | Control   |                |                                 |                             |                      |                |                     | $\hat{P}(\theta < q)$                                                            | $\hat{P}(\theta < \text{null})$ | $\hat{P}(\theta > \text{null})$ | $\hat{P}(\theta > q^*)$ |
| <b>Symptoms, signs or clinical findings of endocrine, nutritional or metabolic diseases</b> |               |                         |           |                |                                 |                             |                      |                |                     |                                                                                  |                                 |                                 |                         |
| Fasting glucose                                                                             | 5             | 465                     | 431       | MD (mmol/L)    | -0.36 (-0.85, 0.13)             | -0.63 (-2.22, 0.97)         | $2.1 \times 10^{-1}$ | 0.17           | N/A                 | N/A                                                                              | N/A                             | N/A                             | N/A                     |
| Hemoglobin A1c                                                                              | 4             | 84                      | 78        | MD (%)         | -0.51 (-1.01, -0.01)            | -0.47 (-0.72, -0.23)        | $1.4 \times 10^{-2}$ | 0              | N/A                 | N/A                                                                              | N/A                             | N/A                             | N/A                     |
| <b>Mental or behavioural symptoms, signs or clinical findings</b>                           |               |                         |           |                |                                 |                             |                      |                |                     |                                                                                  |                                 |                                 |                         |
| Depressive symptom                                                                          | 1             | 39                      | 39        | SMD            | -0.19 (-0.64, 0.26)             | N/A                         | N/A                  | N/A            | N/A                 | N/A                                                                              | N/A                             | N/A                             | N/A                     |
|                                                                                             |               |                         |           | RR             | 0.84 (0.56, 1.27)               | N/A                         | N/A                  | N/A            | N/A                 | N/A                                                                              | N/A                             | N/A                             |                         |
| <b>Diseases of the circulatory system</b>                                                   |               |                         |           |                |                                 |                             |                      |                |                     |                                                                                  |                                 |                                 |                         |
| Coronary heart disease                                                                      |               |                         |           |                |                                 |                             |                      |                |                     |                                                                                  |                                 |                                 |                         |
| Incidence                                                                                   | 4             | 302/1,573               | 330/1,559 | RR             | 0.94 (0.81, 1.09)               | 0.92 (0.38, 2.22)           | $4.6 \times 10^{-1}$ | 0              | N/A                 | N/A                                                                              | N/A                             | N/A                             | N/A                     |
| Mortality                                                                                   | 3             | 135/1,527               | 125/1,533 | RR             | 1.08 (0.86, 1.37)               | 1.08 (0.85, 1.37)           | $1.5 \times 10^{-1}$ | 0              | N/A                 | N/A                                                                              | N/A                             | N/A                             | N/A                     |
| MI                                                                                          | 4             | 145/1,573               | 160/1,559 | RR             | 0.93 (0.75, 1.17)               | 0.91 (0.37, 2.24)           | $4.6 \times 10^{-1}$ | 0              | N/A                 | N/A                                                                              | N/A                             | N/A                             | N/A                     |
| Fatal MI                                                                                    | 3             | 20/1,524                | 18/1,508  | RR             | 1.19 (0.61, 2.30)               | 1.09 (0.07, 17.24)          | $7.9 \times 10^{-1}$ | 0              | N/A                 | N/A                                                                              | N/A                             | N/A                             | N/A                     |
| Non-fatal MI                                                                                | 2             | 122/1,484               | 136/1,488 | RR             | 0.90 (0.71, 1.14)               | 0.90 (0.80, 1.01)           | $5.2 \times 10^{-2}$ | 0              | N/A                 | N/A                                                                              | N/A                             | N/A                             | N/A                     |
| Angina pectoris                                                                             |               |                         |           |                |                                 |                             |                      |                |                     |                                                                                  |                                 |                                 |                         |
| Any angina                                                                                  | 2             | 124/1,484               | 142/1,488 | RR             | 0.91 (0.71, 1.17)               | 0.87 (0.25, 3.07)           | $4.0 \times 10^{-1}$ | 0              | N/A                 | N/A                                                                              | N/A                             | N/A                             | N/A                     |
| Unstable angina                                                                             | 3             | 120/1,524               | 139/1,508 | RR             | 0.88 (0.68, 1.14)               | 0.86 (0.34, 2.12)           | $2.8 \times 10^{-1}$ | 0              | N/A                 | N/A                                                                              | N/A                             | N/A                             | N/A                     |
| Venous thromboembolism                                                                      | 1             | 8/71                    | 1/69      | RR             | 7.77 (1.00, 60.53)              | N/A                         | N/A                  | N/A            | N/A                 | N/A                                                                              | N/A                             | N/A                             | N/A                     |
| Deep vein thrombosis                                                                        | 1             | 4/71                    | 0/69      | RR             | 8.75 (0.48, 159.53)             | N/A                         | N/A                  | N/A            | N/A                 | N/A                                                                              | N/A                             | N/A                             | N/A                     |
| Pulmonary embolism                                                                          | 1             | 3/71                    | 1/69      | RR             | 2.92 (0.31, 27.35)              | N/A                         | N/A                  | N/A            | N/A                 | N/A                                                                              | N/A                             | N/A                             | N/A                     |
| <b>Symptoms, signs or clinical findings of the circulatory system</b>                       |               |                         |           |                |                                 |                             |                      |                |                     |                                                                                  |                                 |                                 |                         |
| Cardiac death                                                                               | 2             | 72/1,484                | 62/1,488  | RR             | 1.19 (0.85, 1.67)               | 1.17 (0.31, 4.42)           | $3.8 \times 10^{-1}$ | 0              | N/A                 | N/A                                                                              | N/A                             | N/A                             | N/A                     |
| Coronary revascularization                                                                  | 2             | 287/1,484               | 311/1,488 | RR             | 0.93 (0.80, 1.08)               | 0.93 (0.66, 1.30)           | $2.1 \times 10^{-1}$ | 0              | N/A                 | N/A                                                                              | N/A                             | N/A                             | N/A                     |
| <b>Symptoms, signs or clinical findings of the genitourinary system</b>                     |               |                         |           |                |                                 |                             |                      |                |                     |                                                                                  |                                 |                                 |                         |
| Vasomotor symptom                                                                           | 6             | 522                     | 217       | MD (freq/week) | -11.79 (-19.57, -4.01)          | -19.64 (-29.14, -10.15)     | $3.4 \times 10^{-3}$ | 7.17           | N/A                 | N/A                                                                              | N/A                             | N/A                             | N/A                     |
|                                                                                             |               |                         |           | RR             | 0.44 (0.34, 0.57)               | 0.39 (0.26, 0.57)           | $1.6 \times 10^{-3}$ | 0.27           | N/A                 | N/A                                                                              | N/A                             | N/A                             | N/A                     |
| Vasomotor symptom severity                                                                  | 6             | 256                     | 164       | SMD            | -1.10 (-1.53, -0.68)            | -1.50 (-2.10, -0.90)        | $1.5 \times 10^{-3}$ | 0.44           | N/A                 | N/A                                                                              | N/A                             | N/A                             | N/A                     |
|                                                                                             |               |                         |           | RR             | 0.36 (0.25, 0.54)               | 0.25 (0.14, 0.44)           | $1.5 \times 10^{-3}$ | 0.41           | N/A                 | N/A                                                                              | N/A                             | N/A                             | N/A                     |
| Urinary incontinence                                                                        | 3             | N/A/5,327               | N/A/5,308 | RR             | 1.09 (1.02, 1.17)               | 1.11 (0.78, 1.59)           | $2.0 \times 10^{-1}$ | 0.05           | N/A                 | N/A                                                                              | N/A                             | N/A                             | N/A                     |
| <b>Functioning assessment</b>                                                               |               |                         |           |                |                                 |                             |                      |                |                     |                                                                                  |                                 |                                 |                         |
| Sleep quality                                                                               | 1             | 16                      | 16        | SMD            | -0.28 (-0.97, 0.42)             | N/A                         | N/A                  | N/A            | N/A                 | N/A                                                                              | N/A                             | N/A                             | N/A                     |
|                                                                                             |               |                         |           | RR             | 0.77 (0.41, 1.46)               | N/A                         | N/A                  | N/A            | N/A                 | N/A                                                                              | N/A                             | N/A                             |                         |
| <b>Others, not elsewhere classified</b>                                                     |               |                         |           |                |                                 |                             |                      |                |                     |                                                                                  |                                 |                                 |                         |
| Cardiovascular disease                                                                      |               |                         |           |                |                                 |                             |                      |                |                     |                                                                                  |                                 |                                 |                         |
| Incidence                                                                                   | 5             | 472/1,644               | 464/1,628 | RR             | 1.03 (0.92, 1.15)               | 0.98 (0.54, 1.78)           | $8.5 \times 10^{-1}$ | 0.19           | N/A                 | N/A                                                                              | N/A                             | N/A                             | N/A                     |
| Mortality                                                                                   | 3             | 161/1,524               | 148/1,508 | RR             | 1.11 (0.89, 1.37)               | 1.09 (0.28, 4.28)           | $5.8 \times 10^{-1}$ | 0              | N/A                 | N/A                                                                              | N/A                             | N/A                             | N/A                     |

Abbreviations: EPT, estrogen plus progestin therapy; freq, frequency; MD, mean difference; MI, myocardial infarction; N/A, not available or not applicable; PI, prediction interval; RR, risk ratio; SMD, standardized mean difference.

<sup>a</sup> Secondary prevention refers to reducing the risk of recurrence of a disease among individuals who already have that disease.

<sup>b</sup> Incidence unless otherwise indicated.

<sup>c</sup> Point estimate with 95% confidence interval of the study with the smallest standard error in each meta-analysis.

<sup>d</sup> Point estimate with 95% confidence interval of robust random-effects meta-analysis.

<sup>e</sup> P-value of robust random-effects meta-analysis.

<sup>f</sup> The estimated standard deviation of true effects (for MD and SMD, T is on its original scale; for RR, T is on log RR scale).

<sup>g</sup> The middle 95% area of the estimated effect distribution. 95% PI is reported only in meta-analyses of  $\geq 10$  studies. More information about how to interpret 95% PI can be found in S3 Text (section 3).

<sup>h</sup> The proportion with 95% confidence interval of true effects ( $\theta$ ) below or above a threshold of scientific importance; complementary to 95% PI, these metrics estimate the area of the lower and upper tails of the effect distribution. For MD, null = 0; for SMD,  $q = -0.2$ , null = 0,  $q^* = 0.2$ ; for RR,  $q = 0.9$ , null = 1.0,  $q^* = 1.1$ . These metrics are reported only in meta-analyses of  $\geq 10$  studies. More information about how to interpret them can be found in S3 Text (section 3).

Table L. Any Menopausal Hormone Therapy for Primary Prevention of Multiple Outcomes in Included Systematic Reviews and Meta-Analyses of Observational Epidemiological Studies<sup>a</sup>

| Outcome <sup>b</sup>                                | Timing of MHT | No. of Studies (Cc/Co) | No. of Cases/Population | Metric | Most Precise Study <sup>c</sup> | Summary Effect <sup>d</sup> | P-Value <sup>e</sup>  | T <sup>f</sup> | 95% PI <sup>g</sup> | Proportion of True Effects ( $\theta$ ) Below/Above a Threshold (%) <sup>h</sup> |                         |                         |                         |
|-----------------------------------------------------|---------------|------------------------|-------------------------|--------|---------------------------------|-----------------------------|-----------------------|----------------|---------------------|----------------------------------------------------------------------------------|-------------------------|-------------------------|-------------------------|
|                                                     |               |                        |                         |        |                                 |                             |                       |                |                     | $\hat{P}(\theta < 0.9)$                                                          | $\hat{P}(\theta < 1.0)$ | $\hat{P}(\theta > 1.0)$ | $\hat{P}(\theta > 1.1)$ |
| <b>Neoplasms</b>                                    |               |                        |                         |        |                                 |                             |                       |                |                     |                                                                                  |                         |                         |                         |
| Cutaneous melanoma                                  | Ever          | 7 (6/1)                | 1,875/61,114            | RR     | 1.20 (0.80, 1.80)               | 1.23 (0.90, 1.68)           | $1.4 \times 10^{-1}$  | 0              | N/A                 | N/A                                                                              | N/A                     | N/A                     | N/A                     |
| Glioma                                              | Ever          | 10 (6/4)               | 3,002/1,580,830         | RR     | 1.05 (0.88, 1.25)               | 0.87 (0.72, 1.04)           | $1.1 \times 10^{-1}$  | 0.16           | 0.57 to 1.21        | 80 (0, 100)                                                                      | 80 (0, 100)             | 20 (0, 70)              | 0 (N/A, N/A)            |
|                                                     | Current       | 7 (4/3)                | 2,632/1,541,011         | RR     | 1.09 (0.90, 1.32)               | 0.82 (0.60, 1.13)           | $1.9 \times 10^{-1}$  | 0.25           | N/A                 | N/A                                                                              | N/A                     | N/A                     | N/A                     |
|                                                     | Past          | 7 (4/3)                | 2,632/1,541,011         | RR     | 1.02 (0.82, 1.27)               | 0.94 (0.75, 1.19)           | $5.5 \times 10^{-1}$  | 0.13           | N/A                 | N/A                                                                              | N/A                     | N/A                     | N/A                     |
| Meningioma                                          | Ever          | 13 (9/4)               | 4,618/1,479,871         | RR     | 1.30 (1.13, 1.50)               | 1.14 (0.98, 1.33)           | $7.6 \times 10^{-2}$  | 0.17           | 0.61 to 1.59        | 8 (0, 38)                                                                        | 31 (0, 62)              | 69 (20, 100)            | 54 (15, 77)             |
|                                                     | Current       | 10 (7/3)               | 4,131/1,451,024         | RR     | 1.30 (1.13, 1.50)               | 1.22 (1.02, 1.46)           | $3.5 \times 10^{-2}$  | 0.19           | 0.53 to 1.77        | 10 (0, 30)                                                                       | 10 (0, 50)              | 90 (10, 100)            | 70 (10, 100)            |
|                                                     | Past          | 10 (7/3)               | 4,131/1,451,024         | RR     | 1.33 (1.10, 1.61)               | 1.15 (0.98, 1.37)           | $8.0 \times 10^{-2}$  | 0.01           | 1.13 to 1.18        | 0 (N/A, N/A)                                                                     | 0 (N/A, N/A)            | 100 (0, 100)            | 100 (0, 100)            |
| Thyroid cancer                                      | Ever          | 12 (4/8)               | 1,957/802,681           | RR     | 1.40 (1.15, 1.70)               | 1.09 (0.88, 1.34)           | $3.6 \times 10^{-1}$  | 0.14           | 0.82 to 1.44        | 17 (0, 100)                                                                      | 25 (0, 100)             | 75 (0, 100)             | 50 (0, 100)             |
|                                                     | Current       | 4 (0/4)                | 1,197/692,663           | RR     | 1.22 (0.95, 1.57)               | 1.11 (0.76, 1.61)           | $4.5 \times 10^{-1}$  | 0.17           | N/A                 | N/A                                                                              | N/A                     | N/A                     | N/A                     |
|                                                     | Past          | 3 (0/3)                | 734/402,492             | RR     | 0.88 (0.61, 1.26)               | 1.01 (0.51, 1.99)           | $9.6 \times 10^{-1}$  | 0.08           | N/A                 | N/A                                                                              | N/A                     | N/A                     | N/A                     |
| Esophageal cancer                                   | Ever          | 5 (4/1)                | 1,432/203,548           | RR     | 0.68 (0.53, 0.88)               | 0.70 (0.60, 0.81)           | $8.6 \times 10^{-3}$  | 0              | N/A                 | N/A                                                                              | N/A                     | N/A                     | N/A                     |
|                                                     | Current       | 3 (1/2)                | 1,093/132,186           | RR     | 0.68 (0.49, 0.94)               | 0.68 (0.62, 0.74)           | $1.0 \times 10^{-2}$  | 0              | N/A                 | N/A                                                                              | N/A                     | N/A                     | N/A                     |
|                                                     | Past          | 3 (1/2)                | 1,093/132,186           | RR     | 0.70 (0.52, 0.95)               | 0.72 (0.35, 1.50)           | $1.1 \times 10^{-1}$  | 0              | N/A                 | N/A                                                                              | N/A                     | N/A                     | N/A                     |
| Gastric cancer                                      | Ever          | 6 (3/3)                | 1,555/616,630           | RR     | 0.75 (0.54, 1.05)               | 0.78 (0.70, 0.86)           | $3.3 \times 10^{-3}$  | 0              | N/A                 | N/A                                                                              | N/A                     | N/A                     | N/A                     |
|                                                     | Current       | 3 (1/2)                | 799/130,359             | RR     | 0.69 (0.43, 1.10)               | 0.75 (0.27, 2.06)           | $1.7 \times 10^{-1}$  | 0              | N/A                 | N/A                                                                              | N/A                     | N/A                     | N/A                     |
|                                                     | Past          | 3 (1/2)                | 799/130,359             | RR     | 0.82 (0.55, 1.22)               | 0.84 (0.61, 1.16)           | $9.2 \times 10^{-2}$  | 0              | N/A                 | N/A                                                                              | N/A                     | N/A                     | N/A                     |
| Colorectal cancer                                   | Ever          | 25 (17/8)              | 22,690/527,776          | RR     | 0.81 (0.73, 0.90)               | 0.83 (0.77, 0.89)           | $2.2 \times 10^{-5}$  | 0.12           | 0.57 to 1.06        | 64 (36, 92)                                                                      | 92 (68, 100)            | 8 (0, 24)               | 0 (N/A, N/A)            |
|                                                     | Current       | 22 (12/10)             | 18,166/582,956          | RR     | 0.80 (0.71, 0.90)               | 0.77 (0.71, 0.83)           | $3.6 \times 10^{-6}$  | 0.10           | 0.63 to 0.92        | 100 (50, 100)                                                                    | 100 (73, 73)            | 0 (N/A, N/A)            | 0 (N/A, N/A)            |
|                                                     | Past          | 18 (12/6)              | 16,011/415,854          | RR     | 0.84 (0.74, 0.96)               | 0.88 (0.81, 0.97)           | $1.1 \times 10^{-2}$  | 0.11           | 0.64 to 1.10        | 56 (0, 94)                                                                       | 89 (11, 100)            | 11 (0, 50)              | 0 (N/A, N/A)            |
| Pancreatic cancer                                   | Ever          | 11 (6/5)               | 2,211/505,673           | RR     | 0.70 (0.54, 0.91)               | 0.96 (0.82, 1.13)           | $6.0 \times 10^{-1}$  | 0.14           | 0.70 to 1.31        | 36 (0, 100)                                                                      | 45 (0, 100)             | 55 (0, 100)             | 27 (0, 100)             |
|                                                     | Current       | 3 (0/3)                | 548/134,847             | RR     | 0.71 (0.53, 0.95)               | 0.86 (0.40, 1.87)           | $4.9 \times 10^{-1}$  | 0.23           | N/A                 | N/A                                                                              | N/A                     | N/A                     | N/A                     |
|                                                     | Past          | 3 (0/3)                | 548/134,847             | RR     | 0.70 (0.49, 1.01)               | 0.89 (0.43, 1.83)           | $5.7 \times 10^{-1}$  | 0.20           | N/A                 | N/A                                                                              | N/A                     | N/A                     | N/A                     |
| Primary liver cancer                                | Ever          | 5 (4/1)                | 887/596,239             | RR     | 1.15 (0.81, 1.63)               | 0.65 (0.30, 1.39)           | $1.8 \times 10^{-1}$  | 0.47           | N/A                 | N/A                                                                              | N/A                     | N/A                     | N/A                     |
|                                                     | Current       | 2 (1/1)                | 539/588,128             | RR     | 1.28 (0.92, 1.79)               | 1.03 (0.03, 35.31)          | $9.2 \times 10^{-1}$  | 0.31           | N/A                 | N/A                                                                              | N/A                     | N/A                     | N/A                     |
|                                                     | Past          | 2 (1/1)                | 539/588,128             | RR     | 1.41 (0.95, 2.09)               | 0.88 (0.00, 437.84)         | $8.3 \times 10^{-1}$  | 0.65           | N/A                 | N/A                                                                              | N/A                     | N/A                     | N/A                     |
| Lung cancer                                         | Ever          | 18 (9/9)               | 13,102/773,738          | RR     | 0.94 (0.87, 1.01)               | 0.95 (0.85, 1.05)           | $2.5 \times 10^{-1}$  | 0.11           | 0.73 to 1.23        | 28 (0, 50)                                                                       | 67 (0, 100)             | 33 (0, 72)              | 6 (0, 33)               |
|                                                     | Current       | 8 (2/6)                | 7,575/464,343           | RR     | 0.94 (0.87, 1.02)               | 0.93 (0.78, 1.12)           | $3.8 \times 10^{-1}$  | 0.13           | N/A                 | N/A                                                                              | N/A                     | N/A                     | N/A                     |
|                                                     | Past          | 6 (1/5)                | 6,725/460,852           | RR     | 0.92 (0.81, 1.04)               | 0.93 (0.88, 0.99)           | $3.5 \times 10^{-2}$  | 0              | N/A                 | N/A                                                                              | N/A                     | N/A                     | N/A                     |
| <b>Breast cancer</b>                                |               |                        |                         |        |                                 |                             |                       |                |                     |                                                                                  |                         |                         |                         |
| Incidence                                           | Ever          | 71 (39/32)             | 108,678/3,331,883       | RR     | 1.52 (1.48, 1.56)               | 1.25 (1.19, 1.31)           | $6.5 \times 10^{-13}$ | 0.14           | 0.93 to 1.74        | 0 (N/A, N/A)                                                                     | 8 (1, 17)               | 92 (79, 97)             | 77 (62, 89)             |
|                                                     | Current       | 52 (22/30)             | 82,830/2,958,526        | RR     | 1.68 (1.64, 1.72)               | 1.43 (1.33, 1.55)           | $1.2 \times 10^{-11}$ | 0.19           | 0.87 to 2.33        | 2 (0, 10)                                                                        | 10 (0, 23)              | 90 (73, 100)            | 83 (67, 92)             |
|                                                     | Past          | 46 (20/26)             | 81,327/2,857,047        | RR     | 1.08 (1.04, 1.12)               | 1.04 (1.00, 1.08)           | $4.4 \times 10^{-2}$  | 0.06           | 0.89 to 1.15        | 2 (0, 17)                                                                        | 22 (0, 57)              | 78 (41, 100)            | 17 (0, 54)              |
| Mortality                                           | Ever          | 10 (3/7)               | 4,281/1,368,552         | RR     | 0.84 (0.75, 0.94)               | 0.95 (0.79, 1.13)           | $4.8 \times 10^{-1}$  | 0.16           | 0.70 to 1.49        | 40 (0, 80)                                                                       | 60 (0, 100)             | 40 (0, 70)              | 30 (0, 70)              |
|                                                     | Current       | 8 (3/5)                | 4,283/1,373,628         | RR     | 1.22 (1.06, 1.41)               | 1.01 (0.79, 1.29)           | $9.2 \times 10^{-1}$  | 0.23           | N/A                 | N/A                                                                              | N/A                     | N/A                     | N/A                     |
|                                                     | Past          | 7 (3/4)                | 4,144/1,332,179         | RR     | 0.78 (0.68, 0.89)               | 0.90 (0.76, 1.07)           | $1.6 \times 10^{-1}$  | 0.08           | N/A                 | N/A                                                                              | N/A                     | N/A                     | N/A                     |
| <b>Endometrial cancer</b>                           |               |                        |                         |        |                                 |                             |                       |                |                     |                                                                                  |                         |                         |                         |
| Incidence                                           | Ever          | 23 (10/13)             | 12,119/1,803,931        | RR     | 1.79 (1.69, 1.90)               | 2.10 (1.70, 2.59)           | $4.1 \times 10^{-7}$  | 0.35           | 0.89 to 5.98        | 0 (N/A, N/A)                                                                     | 4 (0, 13)               | 96 (78, 100)            | 96 (70, 100)            |
|                                                     | Current       | 15 (5/10)              | 10,877/1,765,059        | RR     | 2.03 (1.89, 2.18)               | 3.18 (1.84, 5.48)           | $5.3 \times 10^{-4}$  | 0.67           | 0.71 to 25.57       | 0 (N/A, N/A)                                                                     | 7 (0, 20)               | 93 (67, 100)            | 87 (47, 93)             |
|                                                     | Past          | 14 (4/10)              | 10,705/1,763,167        | RR     | 1.54 (1.43, 1.66)               | 1.56 (1.14, 2.15)           | $1.0 \times 10^{-2}$  | 0.35           | 0.67 to 5.40        | 7 (0, 21)                                                                        | 14 (0, 36)              | 86 (50, 93)             | 86 (50, 100)            |
| Mortality                                           | Ever          | 1 (0/1)                | 6/6,093                 | RR     | 2.60 (0.44, 15.50)              | N/A                         | N/A                   | N/A            | N/A                 | N/A                                                                              | N/A                     | N/A                     | N/A                     |
| Ovarian cancer                                      | Ever          | 37 (26/11)             | 16,290/2,389,636        | RR     | 1.23 (1.14, 1.33)               | 1.16 (1.06, 1.26)           | $1.9 \times 10^{-3}$  | 0.15           | 0.71 to 1.54        | 11 (0, 34)                                                                       | 19 (0, 35)              | 81 (59, 95)             | 76 (51, 89)             |
|                                                     | Current       | 15 (4/11)              | 9,295/2,328,057         | RR     | 1.38 (1.26, 1.51)               | 1.24 (1.08, 1.44)           | $6.3 \times 10^{-3}$  | 0.17           | 0.66 to 2.10        | 7 (0, 27)                                                                        | 20 (0, 53)              | 80 (33, 100)            | 73 (23, 87)             |
|                                                     | Past          | 14 (4/10)              | 8,980/2,283,816         | RR     | 1.00 (0.89, 1.12)               | 1.06 (0.95, 1.17)           | $2.6 \times 10^{-1}$  | 0.11           | 0.75 to 1.54        | 7 (0, 36)                                                                        | 29 (0, 100)             | 71 (0, 100)             | 36 (0, 93)              |
| <b>Diseases of the immune system</b>                |               |                        |                         |        |                                 |                             |                       |                |                     |                                                                                  |                         |                         |                         |
| SLE                                                 | Ever          | 3 (2/1)                | 204/71,061              | RR     | 1.90 (1.16, 3.10)               | 1.62 (0.67, 3.91)           | $1.3 \times 10^{-1}$  | 0              | N/A                 | N/A                                                                              | N/A                     | N/A                     | N/A                     |
|                                                     | Current       | 3 (2/1)                | 204/71,061              | RR     | 1.70 (1.00, 2.90)               | 1.53 (0.80, 2.94)           | $9.9 \times 10^{-2}$  | 0              | N/A                 | N/A                                                                              | N/A                     | N/A                     | N/A                     |
|                                                     | Past          | 3 (2/1)                | 204/71,061              | RR     | 2.20 (1.24, 3.90)               | 1.77 (0.29, 10.88)          | $2.3 \times 10^{-1}$  | 0              | N/A                 | N/A                                                                              | N/A                     | N/A                     | N/A                     |
| <b>Endocrine, nutritional or metabolic diseases</b> |               |                        |                         |        |                                 |                             |                       |                |                     |                                                                                  |                         |                         |                         |
| Diabetes mellitus                                   | Ever          | 2 (0/2)                | 265/9,308               | RR     | 0.63 (0.46, 0.87)               | 0.81 (0.02, 28.81)          | $5.9 \times 10^{-1}$  | 0.34           | N/A                 | N/A                                                                              | N/A                     | N/A                     | N/A                     |

|                                           |         |          |                |    |                   |                     |                      |      |              |             |              |              |              |
|-------------------------------------------|---------|----------|----------------|----|-------------------|---------------------|----------------------|------|--------------|-------------|--------------|--------------|--------------|
|                                           | Current | 2 (0/2)  | 265/9,308      | RR | 0.37 (0.21, 0.64) | 0.61 (0.00, 606.60) | $5.3 \times 10^{-1}$ | 0.68 | N/A          | N/A         | N/A          | N/A          | N/A          |
|                                           | Past    | 2 (0/2)  | 265/9,308      | RR | 0.81 (0.57, 1.16) | 0.90 (0.14, 5.96)   | $6.1 \times 10^{-1}$ | 0    | N/A          | N/A         | N/A          | N/A          | N/A          |
| <b>Mental or behavioural disorders</b>    |         |          |                |    |                   |                     |                      |      |              |             |              |              |              |
| Dementia                                  | Ever    | 3 (0/3)  | 1,799/8,268    | RR | 0.96 (0.84, 1.09) | 0.94 (0.69, 1.28)   | $2.9 \times 10^{-1}$ | 0    | N/A          | N/A         | N/A          | N/A          | N/A          |
|                                           | Current | 2 (0/2)  | 362/6,036      | RR | 1.26 (0.99, 1.61) | 1.23 (0.34, 4.37)   | $2.9 \times 10^{-1}$ | 0    | N/A          | N/A         | N/A          | N/A          | N/A          |
|                                           | Past    | 1 (0/1)  | 79/3,130       | RR | 0.74 (0.35, 1.55) | N/A                 | N/A                  | N/A  | N/A          | N/A         | N/A          | N/A          | N/A          |
| <b>Diseases of the nervous system</b>     |         |          |                |    |                   |                     |                      |      |              |             |              |              |              |
| Parkinson disease                         | Ever    | 8 (5/3)  | 1,839/270,396  | RR | 1.24 (1.00, 1.53) | 1.04 (0.79, 1.36)   | $7.4 \times 10^{-1}$ | 0.21 | N/A          | N/A         | N/A          | N/A          | N/A          |
|                                           | Current | 4 (1/3)  | 904/268,462    | RR | 1.29 (1.03, 1.61) | 1.23 (0.97, 1.57)   | $6.3 \times 10^{-2}$ | 0    | N/A          | N/A         | N/A          | N/A          | N/A          |
|                                           | Past    | 4 (1/3)  | 904/268,462    | RR | 1.08 (0.78, 1.50) | 1.23 (0.81, 1.87)   | $1.9 \times 10^{-1}$ | 0.11 | N/A          | N/A         | N/A          | N/A          | N/A          |
| Alzheimer disease                         | Ever    | 12 (7/5) | 1,597/10,568   | RR | 0.65 (0.48, 0.88) | 0.78 (0.63, 0.95)   | $2.1 \times 10^{-2}$ | 0.17 | 0.58 to 1.01 | 67 (0, 100) | 100 (0, 100) | 0 (N/A, N/A) | 0 (N/A, N/A) |
|                                           | Current | 6 (2/4)  | 685/11,315     | RR | 1.22 (0.89, 1.68) | 1.12 (0.68, 1.83)   | $4.9 \times 10^{-1}$ | 0.04 | N/A          | N/A         | N/A          | N/A          | N/A          |
|                                           | Past    | 3 (1/2)  | 244/5,223      | RR | 1.70 (0.90, 3.20) | 0.64 (0.04, 9.40)   | $5.4 \times 10^{-1}$ | 0.99 | N/A          | N/A         | N/A          | N/A          | N/A          |
| <b>Diseases of the visual system</b>      |         |          |                |    |                   |                     |                      |      |              |             |              |              |              |
| Cataract                                  | Ever    | 7 (3/4)  | 21,354/43,082  | RR | 0.90 (0.84, 0.97) | 0.87 (0.79, 0.97)   | $2.2 \times 10^{-2}$ | 0.07 | N/A          | N/A         | N/A          | N/A          | N/A          |
|                                           | Current | 4 (2/2)  | 20,578/41,179  | RR | 0.88 (0.80, 0.97) | 0.88 (0.79, 0.98)   | $4.0 \times 10^{-2}$ | 0    | N/A          | N/A         | N/A          | N/A          | N/A          |
|                                           | Past    | 4 (2/2)  | 20,578/41,179  | RR | 0.96 (0.87, 1.06) | 0.99 (0.94, 1.05)   | $5.3 \times 10^{-1}$ | 0    | N/A          | N/A         | N/A          | N/A          | N/A          |
| <b>Diseases of the circulatory system</b> |         |          |                |    |                   |                     |                      |      |              |             |              |              |              |
| Coronary heart disease                    |         |          |                |    |                   |                     |                      |      |              |             |              |              |              |
| Incidence                                 | Ever    | 10 (8/2) | 5,215/91,067   | RR | 0.72 (0.64, 0.81) | 0.82 (0.69, 0.96)   | $2.1 \times 10^{-2}$ | 0.12 | 0.69 to 1.14 | 80 (0, 100) | 90 (0, 100)  | 10 (0, 50)   | 0 (N/A, N/A) |
|                                           | Current | 9 (7/2)  | 6,641/98,395   | RR | 0.61 (0.52, 0.71) | 0.74 (0.62, 0.89)   | $6.9 \times 10^{-3}$ | 0.11 | N/A          | N/A         | N/A          | N/A          | N/A          |
|                                           | Past    | 7 (5/2)  | 4,924/90,074   | RR | 0.82 (0.72, 0.94) | 0.87 (0.71, 1.05)   | $1.1 \times 10^{-1}$ | 0.10 | N/A          | N/A         | N/A          | N/A          | N/A          |
| Mortality                                 | Ever    | 3 (0/3)  | 512/49,929     | RR | 0.67 (0.53, 0.85) | 0.67 (0.25, 1.81)   | $2.0 \times 10^{-1}$ | 0.28 | N/A          | N/A         | N/A          | N/A          | N/A          |
|                                           | Current | 5 (1/4)  | 1,238/64,273   | RR | 0.47 (0.32, 0.69) | 0.60 (0.33, 1.08)   | $7.0 \times 10^{-2}$ | 0.34 | N/A          | N/A         | N/A          | N/A          | N/A          |
|                                           | Past    | 5 (1/4)  | 1,188/63,947   | RR | 0.99 (0.75, 1.30) | 0.81 (0.53, 1.26)   | $2.3 \times 10^{-1}$ | 0.18 | N/A          | N/A         | N/A          | N/A          | N/A          |
| Venous thromboembolism                    | Ever    | 4 (3/1)  | 505/123,376    | RR | 1.96 (1.33, 2.89) | 1.99 (1.53, 2.58)   | $5.6 \times 10^{-3}$ | 0    | N/A          | N/A         | N/A          | N/A          | N/A          |
|                                           | Current | 8 (7/1)  | 1,695/128,625  | RR | 1.21 (0.97, 1.51) | 2.08 (1.40, 3.07)   | $4.3 \times 10^{-3}$ | 0.39 | N/A          | N/A         | N/A          | N/A          | N/A          |
|                                           | Past    | 5 (4/1)  | 763/124,237    | RR | 1.10 (0.71, 1.70) | 1.17 (0.96, 1.43)   | $7.7 \times 10^{-2}$ | 0    | N/A          | N/A         | N/A          | N/A          | N/A          |
| Deep vein thrombosis                      | Current | 3 (3/0)  | 321/11,055     | RR | 2.20 (1.34, 3.60) | 2.26 (1.14, 4.49)   | $3.8 \times 10^{-2}$ | 0    | N/A          | N/A         | N/A          | N/A          | N/A          |
| Pulmonary embolism                        | Ever    | 1 (0/1)  | 68/112,593     | RR | 1.65 (0.99, 2.74) | N/A                 | N/A                  | N/A  | N/A          | N/A         | N/A          | N/A          | N/A          |
|                                           | Current | 3 (2/1)  | 176/122,745    | RR | 2.10 (1.16, 3.80) | 2.05 (1.49, 2.83)   | $1.7 \times 10^{-2}$ | 0    | N/A          | N/A         | N/A          | N/A          | N/A          |
|                                           | Past    | 1 (0/1)  | 68/112,593     | RR | 1.30 (0.70, 2.40) | N/A                 | N/A                  | N/A  | N/A          | N/A         | N/A          | N/A          | N/A          |
| <b>Diseases of the respiratory system</b> |         |          |                |    |                   |                     |                      |      |              |             |              |              |              |
| Asthma                                    | Ever    | 5 (0/5)  | 1,646/163,161  | RR | 1.46 (1.21, 1.76) | 1.41 (1.09, 1.81)   | $2.3 \times 10^{-2}$ | 0    | N/A          | N/A         | N/A          | N/A          | N/A          |
|                                           | Current | 5 (0/5)  | 1,646/163,161  | RR | 1.20 (0.99, 1.46) | 1.48 (1.02, 2.13)   | $4.3 \times 10^{-2}$ | 0    | N/A          | N/A         | N/A          | N/A          | N/A          |
|                                           | Past    | 5 (0/5)  | 1,646/163,161  | RR | 1.16 (0.86, 1.57) | 1.37 (1.08, 1.73)   | $2.4 \times 10^{-2}$ | 0    | N/A          | N/A         | N/A          | N/A          | N/A          |
| <b>Diseases of the digestive system</b>   |         |          |                |    |                   |                     |                      |      |              |             |              |              |              |
| Cholelithiasis                            | Ever    | 8 (4/4)  | 19,909/277,380 | RR | 1.48 (1.41, 1.55) | 1.63 (1.41, 1.88)   | $9.4 \times 10^{-4}$ | 0.08 | N/A          | N/A         | N/A          | N/A          | N/A          |
|                                           | Current | 7 (2/5)  | 20,572/368,310 | RR | 1.74 (1.64, 1.85) | 1.89 (1.58, 2.27)   | $3.0 \times 10^{-4}$ | 0.14 | N/A          | N/A         | N/A          | N/A          | N/A          |
|                                           | Past    | 7 (2/5)  | 19,719/278,615 | RR | 1.35 (1.28, 1.42) | 1.40 (1.23, 1.59)   | $5.2 \times 10^{-3}$ | 0.06 | N/A          | N/A         | N/A          | N/A          | N/A          |
| <b>Others, not elsewhere classified</b>   |         |          |                |    |                   |                     |                      |      |              |             |              |              |              |
| All-cause mortality                       | Ever    | 6 (1/5)  | 13,770/106,642 | RR | 0.90 (0.86, 0.94) | 0.89 (0.82, 0.97)   | $2.9 \times 10^{-2}$ | 0    | N/A          | N/A         | N/A          | N/A          | N/A          |
|                                           | Current | 6 (1/5)  | 14,837/109,822 | RR | 0.84 (0.77, 0.92) | 0.79 (0.66, 0.95)   | $2.1 \times 10^{-2}$ | 0.16 | N/A          | N/A         | N/A          | N/A          | N/A          |
|                                           | Past    | 6 (1/5)  | 14,605/109,496 | RR | 0.90 (0.85, 0.95) | 0.92 (0.82, 1.03)   | $1.1 \times 10^{-1}$ | 0.07 | N/A          | N/A         | N/A          | N/A          | N/A          |
| Cardiovascular disease                    |         |          |                |    |                   |                     |                      |      |              |             |              |              |              |
| Incidence                                 | Ever    | 2 (1/1)  | 1,530/8,954    | RR | 1.09 (0.93, 1.28) | 1.11 (0.56, 2.22)   | $3.0 \times 10^{-1}$ | 0    | N/A          | N/A         | N/A          | N/A          | N/A          |
|                                           | Current | 2 (0/2)  | 3,114/77,850   | RR | 0.77 (0.68, 0.87) | 0.90 (0.11, 7.22)   | $6.3 \times 10^{-1}$ | 0.22 | N/A          | N/A         | N/A          | N/A          | N/A          |
|                                           | Past    | 1 (0/1)  | 1,089/7,317    | RR | 1.11 (0.89, 1.39) | N/A                 | N/A                  | N/A  | N/A          | N/A         | N/A          | N/A          | N/A          |
| Mortality                                 | Ever    | 4 (0/4)  | 604/16,896     | RR | 0.66 (0.48, 0.90) | 0.65 (0.40, 1.06)   | $6.7 \times 10^{-2}$ | 0.19 | N/A          | N/A         | N/A          | N/A          | N/A          |
|                                           | Current | 4 (0/4)  | 776/20,402     | RR | 0.96 (0.64, 1.43) | 0.50 (0.18, 1.40)   | $1.2 \times 10^{-1}$ | 0.51 | N/A          | N/A         | N/A          | N/A          | N/A          |
|                                           | Past    | 3 (0/3)  | 632/17,806     | RR | 0.86 (0.64, 1.15) | 0.88 (0.59, 1.31)   | $2.1 \times 10^{-1}$ | 0    | N/A          | N/A         | N/A          | N/A          | N/A          |

Abbreviations: Cc, case-control study; Co, cohort study; MHT, menopausal hormone therapy; N/A, not available or not applicable; PI, prediction interval; RR, risk ratio; SLE, systemic lupus erythematosus.

<sup>a</sup> Primary prevention refers to reducing the risk of occurrence of a disease among individuals who do not have that disease.

<sup>b</sup> Incidence unless otherwise indicated.

<sup>c</sup> Point estimate with 95% confidence interval of the study with the smallest standard error in each meta-analysis.

<sup>d</sup> Point estimate with 95% confidence interval of robust random-effects meta-analysis.

<sup>e</sup> *P*-value of robust random-effects meta-analysis.

<sup>f</sup> The estimated standard deviation (on log RR scale) of true effects.

<sup>g</sup> The middle 95% area of the estimated effect distribution. 95% PI is reported only in meta-analyses of  $\geq 10$  studies. More information about how to interpret 95% PI can be found in S3 Text (section 3).

<sup>h</sup> The proportion with 95% confidence interval of true effects ( $\theta$ ) below or above a threshold of scientific importance; complementary to 95% PI, these metrics estimate the area of the lower and upper tails of the effect distribution. They are reported only in meta-analyses of  $\geq 10$  studies. More information about how to interpret them can be found in S3 Text (section 3).

Table M. Estrogen-Alone Therapy for Primary Prevention of Multiple Outcomes in Included Systematic Reviews and Meta-Analyses of Observational Epidemiological Studies<sup>a</sup>

| Outcome <sup>b</sup>                   | Timing of ET | No. of Studies (Cc/Co) | No. of Cases/Population | Metric | Most Precise Study <sup>c</sup> | Summary Effect <sup>d</sup> | P-Value <sup>e</sup> | T <sup>f</sup> | 95% PI <sup>g</sup> | Proportion of True Effects ( $\theta$ ) Below/Above a Threshold (%) <sup>h</sup> |                         |                         |                         |
|----------------------------------------|--------------|------------------------|-------------------------|--------|---------------------------------|-----------------------------|----------------------|----------------|---------------------|----------------------------------------------------------------------------------|-------------------------|-------------------------|-------------------------|
|                                        |              |                        |                         |        |                                 |                             |                      |                |                     | $\hat{P}(\theta < 0.9)$                                                          | $\hat{P}(\theta < 1.0)$ | $\hat{P}(\theta > 1.0)$ | $\hat{P}(\theta > 1.1)$ |
| <b>Neoplasms</b>                       |              |                        |                         |        |                                 |                             |                      |                |                     |                                                                                  |                         |                         |                         |
| Cutaneous melanoma                     | Ever         | 3 (3/0)                | 995/5,473               | RR     | 2.08 (1.38, 3.14)               | 1.78 (0.74, 4.28)           | $9.8 \times 10^{-2}$ | 0.15           | N/A                 | N/A                                                                              | N/A                     | N/A                     | N/A                     |
| Glioma                                 | Ever         | 2 (2/0)                | 1,347/8,453             | RR     | 1.10 (0.93, 1.30)               | 1.14 (0.50, 2.58)           | $2.9 \times 10^{-1}$ | 0              | N/A                 | N/A                                                                              | N/A                     | N/A                     | N/A                     |
|                                        | Current      | 1 (0/1)                | 557/1,147,894           | RR     | 1.34 (1.04, 1.72)               | N/A                         | N/A                  | N/A            | N/A                 | N/A                                                                              | N/A                     | N/A                     | N/A                     |
| Meningioma                             | Ever         | 4 (4/0)                | 2,292/13,488            | RR     | 1.30 (1.06, 1.60)               | 1.02 (0.48, 2.17)           | $9.4 \times 10^{-1}$ | 0.31           | N/A                 | N/A                                                                              | N/A                     | N/A                     | N/A                     |
|                                        | Current      | 4 (3/1)                | 1,854/1,163,020         | RR     | 1.30 (1.06, 1.60)               | 1.04 (0.47, 2.31)           | $8.7 \times 10^{-1}$ | 0.34           | N/A                 | N/A                                                                              | N/A                     | N/A                     | N/A                     |
|                                        | Past         | 2 (2/0)                | 994/7,230               | RR     | 1.20 (0.76, 1.90)               | 1.10 (0.20, 5.92)           | $6.1 \times 10^{-1}$ | 0              | N/A                 | N/A                                                                              | N/A                     | N/A                     | N/A                     |
| Thyroid cancer                         | Ever         | 5 (1/4)                | 942/461,912             | RR     | 0.84 (0.63, 1.12)               | 1.05 (0.68, 1.60)           | $7.7 \times 10^{-1}$ | 0.23           | N/A                 | N/A                                                                              | N/A                     | N/A                     | N/A                     |
|                                        | Current      | 1 (0/1)                | 463/290,171             | RR     | 1.34 (0.85, 2.11)               | N/A                         | N/A                  | N/A            | N/A                 | N/A                                                                              | N/A                     | N/A                     | N/A                     |
| Esophageal cancer                      | Ever         | 3 (1/2)                | 1,093/132,186           | RR     | 0.65 (0.45, 0.93)               | 0.75 (0.13, 4.26)           | $2.8 \times 10^{-1}$ | 0              | N/A                 | N/A                                                                              | N/A                     | N/A                     | N/A                     |
|                                        | Current      | 1 (0/1)                | 14/51,515               | RR     | 1.44 (0.28, 7.44)               | N/A                         | N/A                  | N/A            | N/A                 | N/A                                                                              | N/A                     | N/A                     | N/A                     |
|                                        | Past         | 1 (0/1)                | 14/51,515               | RR     | 1.72 (0.24, 12.49)              | N/A                         | N/A                  | N/A            | N/A                 | N/A                                                                              | N/A                     | N/A                     | N/A                     |
| Gastric cancer                         | Ever         | 3 (1/2)                | 799/130,359             | RR     | 0.70 (0.44, 1.12)               | 0.77 (0.32, 1.86)           | $1.6 \times 10^{-1}$ | 0              | N/A                 | N/A                                                                              | N/A                     | N/A                     | N/A                     |
|                                        | Current      | 1 (0/1)                | 19/51,515               | RR     | 1.68 (0.44, 6.38)               | N/A                         | N/A                  | N/A            | N/A                 | N/A                                                                              | N/A                     | N/A                     | N/A                     |
|                                        | Past         | 1 (0/1)                | 19/51,515               | RR     | 1.80 (0.36, 9.02)               | N/A                         | N/A                  | N/A            | N/A                 | N/A                                                                              | N/A                     | N/A                     | N/A                     |
| Colorectal cancer                      | Ever         | 13 (9/4)               | 17,166/249,282          | RR     | 0.85 (0.76, 0.95)               | 0.79 (0.71, 0.88)           | $6.9 \times 10^{-4}$ | 0.12           | 0.59 to 0.97        | 85 (31, 100)                                                                     | 100 (N/A, N/A)          | 0 (N/A, N/A)            | 0 (N/A, N/A)            |
|                                        | Current      | 10 (4/6)               | 6,745/353,397           | RR     | 0.90 (0.74, 1.10)               | 0.72 (0.61, 0.86)           | $2.3 \times 10^{-3}$ | 0.17           | 0.54 to 1.08        | 90 (50, 100)                                                                     | 100 (N/A, N/A)          | 0 (N/A, N/A)            | 0 (N/A, N/A)            |
|                                        | Past         | 4 (2/2)                | 3,074/79,127            | RR     | 1.05 (0.86, 1.28)               | 0.96 (0.57, 1.59)           | $8.0 \times 10^{-1}$ | 0.26           | N/A                 | N/A                                                                              | N/A                     | N/A                     | N/A                     |
| Pancreatic cancer                      | Ever         | 4 (3/1)                | 815/62,973              | RR     | 0.84 (0.64, 1.10)               | 0.81 (0.53, 1.23)           | $1.8 \times 10^{-1}$ | 0.10           | N/A                 | N/A                                                                              | N/A                     | N/A                     | N/A                     |
|                                        | Current      | 1 (0/1)                | 263/60,878              | RR     | 0.59 (0.41, 0.84)               | N/A                         | N/A                  | N/A            | N/A                 | N/A                                                                              | N/A                     | N/A                     | N/A                     |
| Primary liver cancer                   | Ever         | 4 (3/1)                | 646/588,661             | RR     | 1.09 (0.63, 1.88)               | 0.70 (0.20, 2.39)           | $3.7 \times 10^{-1}$ | 0.46           | N/A                 | N/A                                                                              | N/A                     | N/A                     | N/A                     |
| Lung cancer                            | Ever         | 8 (4/4)                | 4,761/337,385           | RR     | 0.97 (0.86, 1.09)               | 0.97 (0.83, 1.13)           | $5.8 \times 10^{-1}$ | 0.11           | N/A                 | N/A                                                                              | N/A                     | N/A                     | N/A                     |
|                                        | Current      | 4 (1/3)                | 3,389/252,390           | RR     | 0.96 (0.84, 1.10)               | 0.85 (0.64, 1.13)           | $1.6 \times 10^{-1}$ | 0.13           | N/A                 | N/A                                                                              | N/A                     | N/A                     | N/A                     |
|                                        | Past         | 2 (0/2)                | 2,163/190,780           | RR     | 0.98 (0.84, 1.14)               | 0.93 (0.36, 2.37)           | $5.0 \times 10^{-1}$ | 0.05           | N/A                 | N/A                                                                              | N/A                     | N/A                     | N/A                     |
| <b>Breast cancer</b>                   |              |                        |                         |        |                                 |                             |                      |                |                     |                                                                                  |                         |                         |                         |
| Incidence                              | Ever         | 34 (24/10)             | 62,837/675,959          | RR     | 1.01 (0.94, 1.09)               | 1.06 (0.99, 1.14)           | $7.6 \times 10^{-2}$ | 0              | N/A                 | N/A                                                                              | N/A                     | N/A                     | N/A                     |
|                                        | Current      | 27 (12/15)             | 64,429/2,486,628        | RR     | 1.38 (1.32, 1.44)               | 1.16 (1.08, 1.25)           | $4.0 \times 10^{-4}$ | 0.14           | 0.80 to 1.50        | 4 (0, 19)                                                                        | 19 (4, 45)              | 81 (44, 89)             | 59 (30, 78)             |
|                                        | Past         | 19 (10/9)              | 42,782/1,344,182        | RR     | 1.06 (0.94, 1.19)               | 1.03 (0.97, 1.10)           | $3.1 \times 10^{-1}$ | 0.09           | 0.89 to 1.46        | 0 (N/A, N/A)                                                                     | 32 (0, 100)             | 68 (0, 100)             | 21 (0, 49)              |
| Mortality                              | Ever         | 5 (2/3)                | 3,183/488,161           | RR     | 0.84 (0.75, 0.94)               | 0.87 (0.68, 1.11)           | $1.4 \times 10^{-1}$ | 0.07           | N/A                 | N/A                                                                              | N/A                     | N/A                     | N/A                     |
|                                        | Current      | 4 (2/2)                | 3,131/487,707           | RR     | 1.10 (0.93, 1.30)               | 0.86 (0.48, 1.54)           | $3.9 \times 10^{-1}$ | 0.24           | N/A                 | N/A                                                                              | N/A                     | N/A                     | N/A                     |
|                                        | Past         | 4 (2/2)                | 3,131/487,707           | RR     | 1.00 (0.91, 1.10)               | 0.90 (0.64, 1.27)           | $3.3 \times 10^{-1}$ | 0.13           | N/A                 | N/A                                                                              | N/A                     | N/A                     | N/A                     |
| <b>Endometrial cancer</b>              |              |                        |                         |        |                                 |                             |                      |                |                     |                                                                                  |                         |                         |                         |
| Incidence                              | Ever         | 18 (10/8)              | 5,872/836,988           | RR     | 2.70 (2.14, 3.40)               | 2.55 (2.05, 3.18)           | $1.3 \times 10^{-7}$ | 0.36           | 1.01 to 6.99        | 0 (N/A, N/A)                                                                     | 0 (N/A, N/A)            | 100 (N/A, N/A)          | 100 (N/A, N/A)          |
|                                        | Current      | 13 (4/9)               | 10,663/1,756,930        | RR     | 2.70 (2.41, 3.02)               | 4.75 (3.02, 7.46)           | $7.9 \times 10^{-6}$ | 0.65           | 1.31 to 26.91       | 0 (N/A, N/A)                                                                     | 0 (N/A, N/A)            | 100 (N/A, N/A)          | 100 (N/A, N/A)          |
|                                        | Past         | 10 (4/6)               | 4,524/804,662           | RR     | 1.88 (1.44, 2.46)               | 1.84 (1.18, 2.88)           | $1.3 \times 10^{-2}$ | 0.50           | 0.67 to 8.47        | 0 (N/A, N/A)                                                                     | 10 (0, 30)              | 90 (50, 100)            | 80 (19, 100)            |
| Mortality                              | Ever         | 1 (0/1)                | 6/6,093                 | RR     | 2.60 (0.44, 15.50)              | N/A                         | N/A                  | N/A            | N/A                 | N/A                                                                              | N/A                     | N/A                     | N/A                     |
| Ovarian cancer                         | Ever         | 18 (15/3)              | 6,002/215,733           | RR     | 1.60 (1.28, 2.00)               | 1.21 (1.01, 1.45)           | $3.6 \times 10^{-2}$ | 0.30           | 0.53 to 2.24        | 17 (0, 33)                                                                       | 17 (0, 33)              | 83 (44, 94)             | 78 (39, 94)             |
|                                        | Current      | 9 (2/7)                | 7,092/2,161,898         | RR     | 1.31 (1.11, 1.54)               | 1.36 (1.02, 1.82)           | $4.1 \times 10^{-2}$ | 0.24           | N/A                 | N/A                                                                              | N/A                     | N/A                     | N/A                     |
|                                        | Past         | 4 (2/2)                | 1,429/154,169           | RR     | 1.04 (0.81, 1.34)               | 0.94 (0.60, 1.46)           | $6.6 \times 10^{-1}$ | 0.18           | N/A                 | N/A                                                                              | N/A                     | N/A                     | N/A                     |
| <b>Mental or behavioural disorders</b> |              |                        |                         |        |                                 |                             |                      |                |                     |                                                                                  |                         |                         |                         |
| Dementia                               | Ever         | 1 (0/1)                | 248/1,768               | RR     | 0.79 (0.58, 1.07)               | N/A                         | N/A                  | N/A            | N/A                 | N/A                                                                              | N/A                     | N/A                     | N/A                     |
|                                        | Current      | 1 (0/1)                | 283/2,906               | RR     | 1.23 (0.95, 1.59)               | N/A                         | N/A                  | N/A            | N/A                 | N/A                                                                              | N/A                     | N/A                     | N/A                     |
| <b>Diseases of the nervous system</b>  |              |                        |                         |        |                                 |                             |                      |                |                     |                                                                                  |                         |                         |                         |
| Parkinson disease                      | Ever         | 6 (4/2)                | 856/207,200             | RR     | 1.28 (0.92, 1.78)               | 0.97 (0.46, 2.03)           | $9.2 \times 10^{-1}$ | 0.44           | N/A                 | N/A                                                                              | N/A                     | N/A                     | N/A                     |
|                                        | Current      | 4 (2/2)                | 541/112,661             | RR     | 1.47 (0.98, 2.20)               | 1.23 (0.44, 3.42)           | $4.5 \times 10^{-1}$ | 0              | N/A                 | N/A                                                                              | N/A                     | N/A                     | N/A                     |
|                                        | Past         | 2 (1/1)                | 354/84,971              | RR     | 0.81 (0.47, 1.41)               | 1.44 (0.00, $\infty$ )      | $6.7 \times 10^{-1}$ | 0.82           | N/A                 | N/A                                                                              | N/A                     | N/A                     | N/A                     |
| Alzheimer disease                      | Ever         | 10 (6/4)               | 1,451/8,419             | RR     | 0.65 (0.48, 0.88)               | 0.76 (0.60, 0.96)           | $2.8 \times 10^{-2}$ | 0.17           | 0.56 to 1.03        | 70 (0, 100)                                                                      | 100 (0, 100)            | 0 (N/A, N/A)            | 0 (N/A, N/A)            |
|                                        | Current      | 3 (2/1)                | 357/3,413               | RR     | 1.22 (0.89, 1.68)               | 0.95 (0.25, 3.60)           | $8.6 \times 10^{-1}$ | 0.27           | N/A                 | N/A                                                                              | N/A                     | N/A                     | N/A                     |
|                                        | Past         | 1 (1/0)                | 107/227                 | RR     | 1.70 (0.90, 3.20)               | N/A                         | N/A                  | N/A            | N/A                 | N/A                                                                              | N/A                     | N/A                     | N/A                     |
| <b>Diseases of the visual system</b>   |              |                        |                         |        |                                 |                             |                      |                |                     |                                                                                  |                         |                         |                         |

|                                           |         |         |                |    |                   |                     |                      |      |     |     |     |     |     |
|-------------------------------------------|---------|---------|----------------|----|-------------------|---------------------|----------------------|------|-----|-----|-----|-----|-----|
| Cataract                                  | Ever    | 5 (2/3) | 11,086/21,950  | RR | 0.90 (0.84, 0.97) | 0.84 (0.70, 1.02)   | $6.8 \times 10^{-2}$ | 0.10 | N/A | N/A | N/A | N/A | N/A |
|                                           | Current | 1 (1/0) | 10,000/20,000  | RR | 0.88 (0.80, 0.97) | N/A                 | N/A                  | N/A  | N/A | N/A | N/A | N/A | N/A |
|                                           | Past    | 1 (1/0) | 10,000/20,000  | RR | 0.96 (0.87, 1.06) | N/A                 | N/A                  | N/A  | N/A | N/A | N/A | N/A | N/A |
| <b>Diseases of the circulatory system</b> |         |         |                |    |                   |                     |                      |      |     |     |     |     |     |
| Coronary heart disease                    |         |         |                |    |                   |                     |                      |      |     |     |     |     |     |
| Incidence                                 | Ever    | 4 (4/0) | 1,231/3,463    | RR | 0.90 (0.68, 1.20) | 0.83 (0.58, 1.19)   | $1.5 \times 10^{-1}$ | 0    | N/A | N/A | N/A | N/A | N/A |
|                                           | Current | 7 (6/1) | 5,375/88,254   | RR | 0.55 (0.44, 0.68) | 0.63 (0.45, 0.90)   | $2.5 \times 10^{-2}$ | 0.07 | N/A | N/A | N/A | N/A | N/A |
|                                           | Past    | 2 (2/0) | 949/2,511      | RR | 0.90 (0.62, 1.30) | 0.87 (0.22, 3.51)   | $4.3 \times 10^{-1}$ | 0    | N/A | N/A | N/A | N/A | N/A |
| Mortality                                 | Ever    | 1 (0/1) | 37/1,542       | RR | 1.14 (0.53, 2.44) | N/A                 | N/A                  | N/A  | N/A | N/A | N/A | N/A | N/A |
|                                           | Current | 1 (0/1) | 87/1,868       | RR | 0.99 (0.59, 1.67) | N/A                 | N/A                  | N/A  | N/A | N/A | N/A | N/A | N/A |
|                                           | Past    | 1 (0/1) | 37/1,542       | RR | 1.24 (0.55, 2.78) | N/A                 | N/A                  | N/A  | N/A | N/A | N/A | N/A | N/A |
| Venous thromboembolism                    | Ever    | 1 (0/1) | 68/112,593     | RR | 1.65 (0.99, 2.74) | N/A                 | N/A                  | N/A  | N/A | N/A | N/A | N/A | N/A |
|                                           | Current | 6 (5/1) | 1,179/126,903  | RR | 1.01 (0.76, 1.34) | 1.88 (1.04, 3.40)   | $4.1 \times 10^{-2}$ | 0.49 | N/A | N/A | N/A | N/A | N/A |
|                                           | Past    | 1 (0/1) | 68/112,593     | RR | 1.30 (0.70, 2.40) | N/A                 | N/A                  | N/A  | N/A | N/A | N/A | N/A | N/A |
| Deep vein thrombosis                      | Current | 1 (1/0) | 95/705         | RR | 1.22 (0.57, 2.61) | N/A                 | N/A                  | N/A  | N/A | N/A | N/A | N/A | N/A |
| Pulmonary embolism                        | Ever    | 1 (0/1) | 68/112,593     | RR | 1.65 (0.99, 2.74) | N/A                 | N/A                  | N/A  | N/A | N/A | N/A | N/A | N/A |
|                                           | Current | 1 (0/1) | 68/112,593     | RR | 2.10 (1.16, 3.80) | N/A                 | N/A                  | N/A  | N/A | N/A | N/A | N/A | N/A |
|                                           | Past    | 1 (0/1) | 68/112,593     | RR | 1.30 (0.70, 2.40) | N/A                 | N/A                  | N/A  | N/A | N/A | N/A | N/A | N/A |
| <b>Diseases of the respiratory system</b> |         |         |                |    |                   |                     |                      |      |     |     |     |     |     |
| Asthma                                    | Ever    | 1 (0/1) | 569/57,664     | RR | 1.54 (1.13, 2.09) | N/A                 | N/A                  | N/A  | N/A | N/A | N/A | N/A | N/A |
|                                           | Current | 4 (0/4) | 1,433/158,667  | RR | 1.88 (1.44, 2.45) | 1.86 (1.44, 2.39)   | $6.9 \times 10^{-3}$ | 0    | N/A | N/A | N/A | N/A | N/A |
|                                           | Past    | 1 (0/1) | 569/57,664     | RR | 1.04 (0.51, 2.12) | N/A                 | N/A                  | N/A  | N/A | N/A | N/A | N/A | N/A |
| <b>Diseases of the digestive system</b>   |         |         |                |    |                   |                     |                      |      |     |     |     |     |     |
| Cholelithiasis                            | Ever    | 4 (3/1) | 16,883/187,128 | RR | 1.65 (1.56, 1.75) | 1.66 (1.28, 2.14)   | $2.5 \times 10^{-2}$ | 0    | N/A | N/A | N/A | N/A | N/A |
|                                           | Current | 4 (1/3) | 19,219/332,903 | RR | 1.92 (1.76, 2.10) | 2.01 (1.69, 2.40)   | $2.8 \times 10^{-3}$ | 0.06 | N/A | N/A | N/A | N/A | N/A |
|                                           | Past    | 3 (1/2) | 16,693/188,363 | RR | 1.49 (1.38, 1.61) | 1.37 (0.73, 2.58)   | $1.5 \times 10^{-1}$ | 0.17 | N/A | N/A | N/A | N/A | N/A |
| <b>Others, not elsewhere classified</b>   |         |         |                |    |                   |                     |                      |      |     |     |     |     |     |
| All-cause mortality                       | Ever    | 2 (0/2) | 351/7,635      | RR | 0.80 (0.64, 1.00) | 0.81 (0.59, 1.12)   | $7.7 \times 10^{-2}$ | 0    | N/A | N/A | N/A | N/A | N/A |
|                                           | Current | 3 (1/2) | 5,055/49,077   | RR | 0.69 (0.60, 0.80) | 0.72 (0.57, 0.90)   | $2.7 \times 10^{-2}$ | 0    | N/A | N/A | N/A | N/A | N/A |
|                                           | Past    | 1 (0/1) | 132/1,542      | RR | 0.88 (0.57, 1.36) | N/A                 | N/A                  | N/A  | N/A | N/A | N/A | N/A | N/A |
| Cardiovascular disease                    |         |         |                |    |                   |                     |                      |      |     |     |     |     |     |
| Incidence                                 | Ever    | 1 (1/0) | 441/1,637      | RR | 1.09 (0.65, 1.82) | N/A                 | N/A                  | N/A  | N/A | N/A | N/A | N/A | N/A |
|                                           | Current | 1 (0/1) | 2,025/70,533   | RR | 0.75 (0.65, 0.87) | N/A                 | N/A                  | N/A  | N/A | N/A | N/A | N/A | N/A |
| Mortality                                 | Ever    | 2 (0/2) | 93/7,635       | RR | 0.60 (0.33, 1.10) | 0.81 (0.02, 40.26)  | $6.2 \times 10^{-1}$ | 0.30 | N/A | N/A | N/A | N/A | N/A |
|                                           | Current | 2 (0/2) | 197/4,138      | RR | 0.96 (0.64, 1.43) | 0.72 (0.00, 108.73) | $5.5 \times 10^{-1}$ | 0.45 | N/A | N/A | N/A | N/A | N/A |
|                                           | Past    | 1 (0/1) | 53/1,542       | RR | 1.20 (0.61, 2.35) | N/A                 | N/A                  | N/A  | N/A | N/A | N/A | N/A | N/A |

Abbreviations: Cc, case-control study; Co, cohort study; ET, estrogen-alone therapy; N/A, not available or not applicable; PI, prediction interval; RR, risk ratio.

<sup>a</sup> Primary prevention refers to reducing the risk of occurrence of a disease among individuals who do not have that disease.

<sup>b</sup> Incidence unless otherwise indicated.

<sup>c</sup> Point estimate with 95% confidence interval of the study with the smallest standard error in each meta-analysis.

<sup>d</sup> Point estimate with 95% confidence interval of robust random-effects meta-analysis.

<sup>e</sup> P-value of robust random-effects meta-analysis.

<sup>f</sup> The estimated standard deviation (on log RR scale) of true effects.

<sup>g</sup> The middle 95% area of the estimated effect distribution. 95% PI is reported only in meta-analyses of  $\geq 10$  studies. More information about how to interpret 95% PI can be found in S3 Text (section 3).

<sup>h</sup> The proportion with 95% confidence interval of true effects ( $\theta$ ) below or above a threshold of scientific importance; complementary to 95% PI, these metrics estimate the area of the lower and upper tails of the effect distribution. They are reported only in meta-analyses of  $\geq 10$  studies. More information about how to interpret them can be found in S3 Text (section 3).

Table N. Estrogen Plus Progestin Therapy for Primary Prevention of Multiple Outcomes in Included Systematic Reviews and Meta-Analyses of Observational Epidemiological Studies<sup>a</sup>

| Outcome <sup>b</sup>                      | Timing of EPT | No. of Studies (Cc/Co) | No. of Cases/Population | Metric | Most Precise Study <sup>c</sup> | Summary Effect <sup>d</sup> | P-Value <sup>e</sup> | T <sup>f</sup> | 95% PI <sup>g</sup> | Proportion of True Effects ( $\theta$ ) Below/Above a Threshold (%) <sup>h</sup> |                         |                         |                         |
|-------------------------------------------|---------------|------------------------|-------------------------|--------|---------------------------------|-----------------------------|----------------------|----------------|---------------------|----------------------------------------------------------------------------------|-------------------------|-------------------------|-------------------------|
|                                           |               |                        |                         |        |                                 |                             |                      |                |                     | $\hat{P}(\theta < 0.9)$                                                          | $\hat{P}(\theta < 1.0)$ | $\hat{P}(\theta > 1.0)$ | $\hat{P}(\theta > 1.1)$ |
| <b>Neoplasms</b>                          |               |                        |                         |        |                                 |                             |                      |                |                     |                                                                                  |                         |                         |                         |
| Cutaneous melanoma                        | Ever          | 1 (1/0)                | 151/448                 | RR     | 1.50 (0.80, 2.80)               | N/A                         | N/A                  | N/A            | N/A                 | N/A                                                                              | N/A                     | N/A                     | N/A                     |
| Glioma                                    | Ever          | 2 (2/0)                | 1,347/8,453             | RR     | 0.96 (0.71, 1.29)               | 0.90 (0.29, 2.75)           | $4.3 \times 10^{-1}$ | 0              | N/A                 | N/A                                                                              | N/A                     | N/A                     | N/A                     |
|                                           | Current       | 1 (0/1)                | 557/1,147,894           | RR     | 0.94 (0.72, 1.23)               | N/A                         | N/A                  | N/A            | N/A                 | N/A                                                                              | N/A                     | N/A                     | N/A                     |
| Meningioma                                | Ever          | 3 (3/0)                | 2,222/13,304            | RR     | 1.16 (0.92, 1.46)               | 1.21 (0.82, 1.78)           | $1.2 \times 10^{-1}$ | 0              | N/A                 | N/A                                                                              | N/A                     | N/A                     | N/A                     |
|                                           | Current       | 3 (2/1)                | 1,784/1,162,836         | RR     | 1.21 (0.86, 1.71)               | 1.14 (0.96, 1.34)           | $8.1 \times 10^{-2}$ | 0              | N/A                 | N/A                                                                              | N/A                     | N/A                     | N/A                     |
|                                           | Past          | 1 (1/0)                | 924/7,046               | RR     | 1.29 (0.79, 2.10)               | N/A                         | N/A                  | N/A            | N/A                 | N/A                                                                              | N/A                     | N/A                     | N/A                     |
| Thyroid cancer                            | Ever          | 5 (1/4)                | 942/461,912             | RR     | 0.97 (0.71, 1.32)               | 1.09 (0.79, 1.50)           | $4.7 \times 10^{-1}$ | 0              | N/A                 | N/A                                                                              | N/A                     | N/A                     | N/A                     |
| Esophageal cancer                         | Ever          | 3 (1/2)                | 1,093/132,186           | RR     | 0.77 (0.57, 1.04)               | 0.75 (0.62, 0.91)           | $3.3 \times 10^{-2}$ | 0              | N/A                 | N/A                                                                              | N/A                     | N/A                     | N/A                     |
|                                           | Current       | 1 (0/1)                | 25/74,372               | RR     | 0.43 (0.14, 1.31)               | N/A                         | N/A                  | N/A            | N/A                 | N/A                                                                              | N/A                     | N/A                     | N/A                     |
|                                           | Past          | 1 (0/1)                | 25/74,372               | RR     | 0.36 (0.05, 2.74)               | N/A                         | N/A                  | N/A            | N/A                 | N/A                                                                              | N/A                     | N/A                     | N/A                     |
| Gastric cancer                            | Ever          | 3 (1/2)                | 799/130,359             | RR     | 0.83 (0.56, 1.24)               | 0.70 (0.11, 4.30)           | $2.4 \times 10^{-1}$ | 0              | N/A                 | N/A                                                                              | N/A                     | N/A                     | N/A                     |
|                                           | Current       | 1 (0/1)                | 30/74,372               | RR     | 0.43 (0.14, 1.30)               | N/A                         | N/A                  | N/A            | N/A                 | N/A                                                                              | N/A                     | N/A                     | N/A                     |
|                                           | Past          | 1 (0/1)                | 30/74,372               | RR     | 0.34 (0.05, 2.51)               | N/A                         | N/A                  | N/A            | N/A                 | N/A                                                                              | N/A                     | N/A                     | N/A                     |
| Colorectal cancer                         | Ever          | 10 (7/3)               | 15,238/236,085          | RR     | 0.83 (0.73, 0.94)               | 0.79 (0.71, 0.87)           | $3.1 \times 10^{-3}$ | 0              | N/A                 | N/A                                                                              | N/A                     | N/A                     | N/A                     |
|                                           | Current       | 9 (4/5)                | 6,503/356,228           | RR     | 0.94 (0.78, 1.14)               | 0.86 (0.73, 1.00)           | $5.1 \times 10^{-2}$ | 0.06           | N/A                 | N/A                                                                              | N/A                     | N/A                     | N/A                     |
|                                           | Past          | 3 (2/1)                | 2,825/71,426            | RR     | 0.88 (0.60, 1.29)               | 0.78 (0.38, 1.62)           | $2.5 \times 10^{-1}$ | 0              | N/A                 | N/A                                                                              | N/A                     | N/A                     | N/A                     |
| Pancreatic cancer                         | Ever          | 1 (0/1)                | 263/60,878              | RR     | 0.81 (0.58, 1.14)               | N/A                         | N/A                  | N/A            | N/A                 | N/A                                                                              | N/A                     | N/A                     | N/A                     |
|                                           | Current       | 1 (0/1)                | 263/60,878              | RR     | 0.84 (0.60, 1.17)               | N/A                         | N/A                  | N/A            | N/A                 | N/A                                                                              | N/A                     | N/A                     | N/A                     |
| Primary liver cancer                      | Ever          | 2 (1/1)                | 539/588,128             | RR     | 0.63 (0.36, 1.09)               | 0.68 (0.20, 2.35)           | $1.6 \times 10^{-1}$ | 0              | N/A                 | N/A                                                                              | N/A                     | N/A                     | N/A                     |
| Lung cancer                               | Ever          | 6 (2/4)                | 4,394/286,895           | RR     | 1.03 (0.91, 1.17)               | 1.03 (0.85, 1.25)           | $7.0 \times 10^{-1}$ | 0.09           | N/A                 | N/A                                                                              | N/A                     | N/A                     | N/A                     |
|                                           | Current       | 4 (1/3)                | 2,922/201,963           | RR     | 0.97 (0.83, 1.13)               | 0.86 (0.64, 1.15)           | $1.7 \times 10^{-1}$ | 0.11           | N/A                 | N/A                                                                              | N/A                     | N/A                     | N/A                     |
|                                           | Past          | 2 (0/2)                | 1,696/140,353           | RR     | 1.19 (0.98, 1.45)               | 1.14 (0.50, 2.59)           | $2.8 \times 10^{-1}$ | 0              | N/A                 | N/A                                                                              | N/A                     | N/A                     | N/A                     |
| <b>Breast cancer</b>                      |               |                        |                         |        |                                 |                             |                      |                |                     |                                                                                  |                         |                         |                         |
| Incidence                                 | Ever          | 34 (22/12)             | 58,983/624,400          | RR     | 1.44 (1.35, 1.54)               | 1.40 (1.30, 1.51)           | $1.1 \times 10^{-9}$ | 0.14           | 1.03 to 2.12        | 0 (N/A, N/A)                                                                     | 0 (N/A, N/A)            | 100 (82, 100)           | 91 (68, 100)            |
|                                           | Current       | 26 (10/16)             | 61,010/2,438,210        | RR     | 1.96 (1.90, 2.02)               | 1.75 (1.55, 1.98)           | $1.3 \times 10^{-9}$ | 0.21           | 0.96 to 2.84        | 0 (N/A, N/A)                                                                     | 0 (N/A, N/A)            | 100 (77, 100)           | 92 (62, 100)            |
|                                           | Past          | 16 (8/8)               | 37,921/1,217,291        | RR     | 1.04 (0.93, 1.16)               | 1.07 (0.97, 1.18)           | $1.4 \times 10^{-1}$ | 0.11           | 0.81 to 1.40        | 6 (0, 31)                                                                        | 25 (0, 69)              | 75 (0, 94)              | 44 (0, 75)              |
| Mortality                                 | Ever          | 2 (2/0)                | 1,566/16,317            | RR     | 0.90 (0.74, 1.10)               | 0.87 (0.36, 2.09)           | $2.9 \times 10^{-1}$ | 0              | N/A                 | N/A                                                                              | N/A                     | N/A                     | N/A                     |
|                                           | Current       | 3 (2/1)                | 1,705/57,766            | RR     | 0.90 (0.62, 1.30)               | 0.98 (0.49, 1.94)           | $9.1 \times 10^{-1}$ | 0.19           | N/A                 | N/A                                                                              | N/A                     | N/A                     | N/A                     |
|                                           | Past          | 2 (2/0)                | 1,566/16,317            | RR     | 0.80 (0.58, 1.10)               | 0.79 (0.51, 1.22)           | $9.1 \times 10^{-2}$ | 0              | N/A                 | N/A                                                                              | N/A                     | N/A                     | N/A                     |
| Endometrial cancer                        | Ever          | 8 (2/6)                | 4,210/824,680           | RR     | 0.94 (0.82, 1.08)               | 1.30 (0.93, 1.83)           | $1.0 \times 10^{-1}$ | 0.31           | N/A                 | N/A                                                                              | N/A                     | N/A                     | N/A                     |
|                                           | Current       | 8 (1/7)                | 9,103/1,735,287         | RR     | 1.71 (1.57, 1.86)               | 1.30 (0.93, 1.82)           | $1.0 \times 10^{-1}$ | 0.35           | N/A                 | N/A                                                                              | N/A                     | N/A                     | N/A                     |
|                                           | Past          | 5 (1/4)                | 2,964/783,019           | RR     | 0.97 (0.79, 1.19)               | 1.07 (0.62, 1.83)           | $7.3 \times 10^{-1}$ | 0.27           | N/A                 | N/A                                                                              | N/A                     | N/A                     | N/A                     |
| Ovarian cancer                            | Ever          | 11 (8/3)               | 4,804/188,492           | RR     | 1.39 (1.07, 1.81)               | 1.18 (1.05, 1.32)           | $1.2 \times 10^{-2}$ | 0              | N/A                 | N/A                                                                              | N/A                     | N/A                     | N/A                     |
|                                           | Current       | 8 (1/7)                | 6,903/2,137,296         | RR     | 1.50 (1.34, 1.68)               | 1.28 (1.07, 1.53)           | $1.7 \times 10^{-2}$ | 0.14           | N/A                 | N/A                                                                              | N/A                     | N/A                     | N/A                     |
|                                           | Past          | 4 (1/3)                | 1,555/173,808           | RR     | 1.40 (0.86, 2.28)               | 1.71 (0.96, 3.05)           | $6.0 \times 10^{-2}$ | 0.10           | N/A                 | N/A                                                                              | N/A                     | N/A                     | N/A                     |
| <b>Mental or behavioural disorders</b>    |               |                        |                         |        |                                 |                             |                      |                |                     |                                                                                  |                         |                         |                         |
| Dementia                                  | Ever          | 1 (0/1)                | 248/1,768               | RR     | 0.93 (0.64, 1.35)               | N/A                         | N/A                  | N/A            | N/A                 | N/A                                                                              | N/A                     | N/A                     | N/A                     |
|                                           | Current       | 1 (0/1)                | 283/2,906               | RR     | 1.34 (0.95, 1.89)               | N/A                         | N/A                  | N/A            | N/A                 | N/A                                                                              | N/A                     | N/A                     | N/A                     |
| <b>Diseases of the nervous system</b>     |               |                        |                         |        |                                 |                             |                      |                |                     |                                                                                  |                         |                         |                         |
| Parkinson disease                         | Ever          | 2 (0/2)                | 527/206,535             | RR     | 1.47 (1.09, 1.98)               | 1.22 (0.09, 16.88)          | $5.1 \times 10^{-1}$ | 0.23           | N/A                 | N/A                                                                              | N/A                     | N/A                     | N/A                     |
|                                           | Current       | 3 (1/2)                | 474/112,524             | RR     | 1.63 (1.15, 2.31)               | 1.27 (0.41, 3.97)           | $4.2 \times 10^{-1}$ | 0.31           | N/A                 | N/A                                                                              | N/A                     | N/A                     | N/A                     |
|                                           | Past          | 1 (0/1)                | 287/84,834              | RR     | 1.10 (0.71, 1.70)               | N/A                         | N/A                  | N/A            | N/A                 | N/A                                                                              | N/A                     | N/A                     | N/A                     |
| Alzheimer disease                         | Ever          | 1 (0/1)                | 176/1,768               | RR     | 0.93 (0.60, 1.43)               | N/A                         | N/A                  | N/A            | N/A                 | N/A                                                                              | N/A                     | N/A                     | N/A                     |
|                                           | Current       | 2 (1/1)                | 250/3,186               | RR     | 1.41 (0.94, 2.12)               | 1.42 (1.24, 1.62)           | $2.0 \times 10^{-2}$ | 0              | N/A                 | N/A                                                                              | N/A                     | N/A                     | N/A                     |
| <b>Diseases of the visual system</b>      |               |                        |                         |        |                                 |                             |                      |                |                     |                                                                                  |                         |                         |                         |
| Cataract                                  | Ever          | 2 (1/1)                | 10,236/20,699           | RR     | 0.93 (0.85, 1.01)               | 0.93 (0.82, 1.04)           | $7.8 \times 10^{-2}$ | 0              | N/A                 | N/A                                                                              | N/A                     | N/A                     | N/A                     |
|                                           | Current       | 1 (1/0)                | 10,000/20,000           | RR     | 0.85 (0.76, 0.96)               | N/A                         | N/A                  | N/A            | N/A                 | N/A                                                                              | N/A                     | N/A                     | N/A                     |
|                                           | Past          | 1 (1/0)                | 10,000/20,000           | RR     | 1.04 (0.92, 1.17)               | N/A                         | N/A                  | N/A            | N/A                 | N/A                                                                              | N/A                     | N/A                     | N/A                     |
| <b>Diseases of the circulatory system</b> |               |                        |                         |        |                                 |                             |                      |                |                     |                                                                                  |                         |                         |                         |

|                                           |         |         |                |    |                   |                    |                      |      |     |     |     |     |     |
|-------------------------------------------|---------|---------|----------------|----|-------------------|--------------------|----------------------|------|-----|-----|-----|-----|-----|
| Coronary heart disease                    | Ever    | 1 (1/0) | 846/1,687      | RR | 1.20 (0.60, 2.40) | N/A                | N/A                  | N/A  | N/A | N/A | N/A | N/A | N/A |
|                                           | Current | 4 (3/1) | 4,230/85,027   | RR | 0.64 (0.48, 0.85) | 0.71 (0.56, 0.91)  | $2.4 \times 10^{-2}$ | 0    | N/A | N/A | N/A | N/A | N/A |
| Venous thromboembolism                    | Current | 5 (5/0) | 1,111/14,310   | RR | 1.48 (1.12, 1.95) | 2.22 (1.19, 4.14)  | $2.6 \times 10^{-2}$ | 0.31 | N/A | N/A | N/A | N/A | N/A |
| Deep vein thrombosis                      | Current | 1 (1/0) | 95/705         | RR | 2.70 (1.44, 5.07) | N/A                | N/A                  | N/A  | N/A | N/A | N/A | N/A | N/A |
| <b>Diseases of the respiratory system</b> |         |         |                |    |                   |                    |                      |      |     |     |     |     |     |
| Asthma                                    | Ever    | 1 (0/1) | 569/57,664     | RR | 1.12 (0.92, 1.36) | N/A                | N/A                  | N/A  | N/A | N/A | N/A | N/A | N/A |
|                                           | Current | 4 (0/4) | 1,433/158,667  | RR | 1.14 (0.93, 1.40) | 1.46 (0.92, 2.31)  | $7.9 \times 10^{-2}$ | 0.20 | N/A | N/A | N/A | N/A | N/A |
|                                           | Past    | 1 (0/1) | 569/57,664     | RR | 0.97 (0.64, 1.46) | N/A                | N/A                  | N/A  | N/A | N/A | N/A | N/A | N/A |
| <b>Diseases of the digestive system</b>   |         |         |                |    |                   |                    |                      |      |     |     |     |     |     |
| Cholelithiasis                            | Ever    | 1 (1/0) | 16,386/180,246 | RR | 1.40 (1.33, 1.47) | N/A                | N/A                  | N/A  | N/A | N/A | N/A | N/A | N/A |
|                                           | Current | 2 (1/1) | 18,059/235,091 | RR | 1.66 (1.53, 1.80) | 1.67 (1.28, 2.18)  | $2.6 \times 10^{-2}$ | 0    | N/A | N/A | N/A | N/A | N/A |
|                                           | Past    | 1 (1/0) | 16,386/180,246 | RR | 1.28 (1.20, 1.36) | N/A                | N/A                  | N/A  | N/A | N/A | N/A | N/A | N/A |
| <b>Others, not elsewhere classified</b>   |         |         |                |    |                   |                    |                      |      |     |     |     |     |     |
| All-cause mortality                       | Current | 2 (1/1) | 4,691/47,209   | RR | 0.46 (0.36, 0.58) | 0.59 (0.02, 21.95) | $3.1 \times 10^{-1}$ | 0.35 | N/A | N/A | N/A | N/A | N/A |
| Cardiovascular disease                    | Ever    | 1 (1/0) | 441/1,637      | RR | 1.16 (0.43, 3.12) | N/A                | N/A                  | N/A  | N/A | N/A | N/A | N/A | N/A |
|                                           | Current | 1 (0/1) | 2,025/70,533   | RR | 0.91 (0.75, 1.11) | N/A                | N/A                  | N/A  | N/A | N/A | N/A | N/A | N/A |

Abbreviations: Cc, case-control study; Co, cohort study; EPT, estrogen plus progestin therapy; N/A, not available or not applicable; PI, prediction interval; RR, risk ratio.

<sup>a</sup> Primary prevention refers to reducing the risk of occurrence of a disease among individuals who do not have that disease.

<sup>b</sup> Incidence unless otherwise indicated.

<sup>c</sup> Point estimate with 95% confidence interval of the study with the smallest standard error in each meta-analysis.

<sup>d</sup> Point estimate with 95% confidence interval of robust random-effects meta-analysis.

<sup>e</sup> *P*-value of robust random-effects meta-analysis.

<sup>f</sup> The estimated standard deviation (on log RR scale) of true effects.

<sup>g</sup> The middle 95% area of the estimated effect distribution. 95% PI is reported only in meta-analyses of  $\geq 10$  studies. More information about how to interpret 95% PI can be found in S3 Text (section 3).

<sup>h</sup> The proportion with 95% confidence interval of true effects ( $\theta$ ) below or above a threshold of scientific importance; complementary to 95% PI, these metrics estimate the area of the lower and upper tails of the effect distribution. They are reported only in meta-analyses of  $\geq 10$  studies. More information about how to interpret them can be found in S3 Text (section 3).



**Table O. Any Menopausal Hormone Therapy for Secondary Prevention of Multiple Outcomes in Included Systematic Reviews and Meta-Analyses of Observational Epidemiological Studies<sup>a</sup>**

| Outcome <sup>b</sup>         | Timing of MHT | No. of Studies (Cc/Co) | No. of Cases/Population | Metric | Most Precise Study <sup>c</sup> | Summary Effect <sup>d</sup> | P-Value <sup>e</sup> | T <sup>f</sup> | 95% PI <sup>g</sup> | Proportion of True Effects ( $\theta$ ) Below/Above a Threshold (%) <sup>h</sup> |                         |                         |                         |
|------------------------------|---------------|------------------------|-------------------------|--------|---------------------------------|-----------------------------|----------------------|----------------|---------------------|----------------------------------------------------------------------------------|-------------------------|-------------------------|-------------------------|
|                              |               |                        |                         |        |                                 |                             |                      |                |                     | $\hat{P}(\theta < 0.9)$                                                          | $\hat{P}(\theta < 1.0)$ | $\hat{P}(\theta > 1.0)$ | $\hat{P}(\theta > 1.1)$ |
| <b>Neoplasms</b>             |               |                        |                         |        |                                 |                             |                      |                |                     |                                                                                  |                         |                         |                         |
| Lung cancer overall survival | Ever          | 3 (0/3)                | N/A/1,972               | RR     | 0.77 (0.65, 0.92)               | 1.06 (0.45, 2.51)           | $8.0 \times 10^{-1}$ | 0.29           | N/A                 | N/A                                                                              | N/A                     | N/A                     | N/A                     |
|                              | Current       | 1 (0/1)                | N/A/454                 | RR     | 0.91 (0.76, 1.09)               | N/A                         | N/A                  | N/A            | N/A                 | N/A                                                                              | N/A                     | N/A                     | N/A                     |
| <b>Breast cancer</b>         |               |                        |                         |        |                                 |                             |                      |                |                     |                                                                                  |                         |                         |                         |
| Recurrence                   | Ever          | 2 (0/2)                | 408/1,991               | RR     | 0.72 (0.57, 0.91)               | 0.69 (0.29, 1.61)           | $1.1 \times 10^{-1}$ | 0              | N/A                 | N/A                                                                              | N/A                     | N/A                     | N/A                     |
| Specific survival            | Ever          | 11 (0/11)              | 3,174/24,753            | RR     | 0.87 (0.77, 0.98)               | 0.72 (0.59, 0.88)           | $6.1 \times 10^{-3}$ | 0.17           | 0.48 to 0.93        | 100 (N/A, N/A)                                                                   | 100 (N/A, N/A)          | 0 (N/A, N/A)            | 0 (N/A, N/A)            |
|                              | Current       | 11 (0/11)              | 3,561/34,022            | RR     | 0.85 (0.74, 0.98)               | 0.74 (0.62, 0.88)           | $6.0 \times 10^{-3}$ | 0.08           | 0.62 to 0.86        | 100 (N/A, N/A)                                                                   | 100 (N/A, N/A)          | 0 (N/A, N/A)            | 0 (N/A, N/A)            |
|                              | Past          | 7 (0/7)                | 2,850/22,070            | RR     | 0.92 (0.78, 1.08)               | 0.91 (0.70, 1.18)           | $3.6 \times 10^{-1}$ | 0.12           | N/A                 | N/A                                                                              | N/A                     | N/A                     | N/A                     |
| Overall survival             | Ever          | 16 (0/16)              | 12,969/39,593           | RR     | 0.86 (0.82, 0.91)               | 0.82 (0.75, 0.89)           | $2.9 \times 10^{-4}$ | 0.10           | 0.59 to 1.06        | 81 (38, 94)                                                                      | 94 (69, 100)            | 6 (0, 31)               | 0 (N/A, N/A)            |
|                              | Current       | 7 (0/7)                | 7,763/33,414            | RR     | 0.82 (0.76, 0.88)               | 0.79 (0.73, 0.86)           | $1.7 \times 10^{-3}$ | 0              | N/A                 | N/A                                                                              | N/A                     | N/A                     | N/A                     |
|                              | Past          | 4 (0/4)                | 6,652/22,526            | RR     | 0.91 (0.85, 0.97)               | 0.92 (0.73, 1.16)           | $1.7 \times 10^{-1}$ | 0              | N/A                 | N/A                                                                              | N/A                     | N/A                     | N/A                     |
| <b>Ovarian cancer</b>        |               |                        |                         |        |                                 |                             |                      |                |                     |                                                                                  |                         |                         |                         |
| Recurrence                   | Ever          | 2 (0/2)                | 40/483                  | RR     | 0.93 (0.64, 1.35)               | 0.87 (0.33, 2.29)           | $3.2 \times 10^{-1}$ | 0              | N/A                 | N/A                                                                              | N/A                     | N/A                     | N/A                     |
| Overall survival             | Ever          | 3 (0/3)                | 187/599                 | RR     | 0.80 (0.57, 1.13)               | 0.81 (0.71, 0.91)           | $2.5 \times 10^{-2}$ | 0              | N/A                 | N/A                                                                              | N/A                     | N/A                     | N/A                     |

Abbreviations: Cc, case-control study; Co, cohort study; MHT, menopausal hormone therapy; N/A, not available or not applicable; PI, prediction interval; RR, risk ratio.

<sup>a</sup> Secondary prevention refers to reducing the risk of recurrence of a disease among individuals who already have that disease.

<sup>b</sup> Incidence unless otherwise indicated.

<sup>c</sup> Point estimate with 95% confidence interval of the study with the smallest standard error in each meta-analysis.

<sup>d</sup> Point estimate with 95% confidence interval of robust random-effects meta-analysis.

<sup>e</sup> P-value of robust random-effects meta-analysis.

<sup>f</sup> The estimated standard deviation (on log RR scale) of true effects.

<sup>g</sup> The middle 95% area of the estimated effect distribution. 95% PI is reported only in meta-analyses of  $\geq 10$  studies. More information about how to interpret 95% PI can be found in S3 Text (section 3).

<sup>h</sup> The proportion with 95% confidence interval of true effects ( $\theta$ ) below or above a threshold of scientific importance; complementary to 95% PI, these metrics estimate the area of the lower and upper tails of the effect distribution. They are reported only in meta-analyses of  $\geq 10$  studies. More information about how to interpret them can be found in S3 Text (section 3).

**Table P. Estrogen-Alone Therapy for Secondary Prevention of Multiple Outcomes in Included Systematic Reviews and Meta-Analyses of Observational Epidemiological Studies<sup>a</sup>**

| Outcome <sup>b</sup>         | Timing of ET | No. of Studies (Cc/Co) | No. of Cases/Population | Metric | Most Precise Study <sup>c</sup> | Summary Effect <sup>d</sup> | P-Value <sup>e</sup> | T <sup>f</sup> | 95% PI <sup>g</sup> | Proportion of True Effects ( $\theta$ ) Below/Above a Threshold (%) <sup>h</sup> |                         |                         |                         |
|------------------------------|--------------|------------------------|-------------------------|--------|---------------------------------|-----------------------------|----------------------|----------------|---------------------|----------------------------------------------------------------------------------|-------------------------|-------------------------|-------------------------|
|                              |              |                        |                         |        |                                 |                             |                      |                |                     | $\hat{P}(\theta < 0.9)$                                                          | $\hat{P}(\theta < 1.0)$ | $\hat{P}(\theta > 1.0)$ | $\hat{P}(\theta > 1.1)$ |
| <b>Neoplasms</b>             |              |                        |                         |        |                                 |                             |                      |                |                     |                                                                                  |                         |                         |                         |
| Lung cancer overall survival | Ever         | 1 (0/1)                | N/A/484                 | RR     | 0.85 (0.70, 1.03)               | N/A                         | N/A                  | N/A            | N/A                 | N/A                                                                              | N/A                     | N/A                     | N/A                     |
| <b>Breast cancer</b>         |              |                        |                         |        |                                 |                             |                      |                |                     |                                                                                  |                         |                         |                         |
| Recurrence                   | Ever         | 2 (0/2)                | 386/1,790               | RR     | 0.63 (0.42, 0.95)               | 0.59 (0.18, 1.95)           | $1.1 \times 10^{-1}$ | 0              | N/A                 | N/A                                                                              | N/A                     | N/A                     | N/A                     |
| Specific survival            | Ever         | 4 (0/4)                | 2,161/15,970            | RR     | 0.89 (0.78, 1.02)               | 0.86 (0.56, 1.31)           | $1.8 \times 10^{-1}$ | 0.11           | N/A                 | N/A                                                                              | N/A                     | N/A                     | N/A                     |
|                              | Current      | 6 (0/6)                | 2,990/25,988            | RR     | 0.91 (0.76, 1.09)               | 0.94 (0.80, 1.11)           | $2.6 \times 10^{-1}$ | 0              | N/A                 | N/A                                                                              | N/A                     | N/A                     | N/A                     |
|                              | Past         | 2 (0/2)                | 1,973/14,180            | RR     | 0.86 (0.70, 1.05)               | 0.87 (0.65, 1.16)           | $1.0 \times 10^{-1}$ | 0              | N/A                 | N/A                                                                              | N/A                     | N/A                     | N/A                     |
| Overall survival             | Ever         | 4 (0/4)                | 6,508/20,937            | RR     | 0.87 (0.82, 0.93)               | 0.83 (0.59, 1.16)           | $1.3 \times 10^{-1}$ | 0.09           | N/A                 | N/A                                                                              | N/A                     | N/A                     | N/A                     |
|                              | Current      | 4 (0/4)                | 5,154/21,890            | RR     | 0.86 (0.78, 0.94)               | 0.88 (0.65, 1.18)           | $1.3 \times 10^{-1}$ | 0              | N/A                 | N/A                                                                              | N/A                     | N/A                     | N/A                     |
|                              | Past         | 1 (0/1)                | 3,953/12,269            | RR     | 0.89 (0.82, 0.96)               | N/A                         | N/A                  | N/A            | N/A                 | N/A                                                                              | N/A                     | N/A                     | N/A                     |

Abbreviations: Cc, case-control study; Co, cohort study; ET, estrogen-alone therapy; N/A, not available or not applicable; PI, prediction interval; RR, risk ratio.

<sup>a</sup> Secondary prevention refers to reducing the risk of recurrence of a disease among individuals who already have that disease.

<sup>b</sup> Incidence unless otherwise indicated.

<sup>c</sup> Point estimate with 95% confidence interval of the study with the smallest standard error in each meta-analysis.

<sup>d</sup> Point estimate with 95% confidence interval of robust random-effects meta-analysis.

<sup>e</sup> P-value of robust random-effects meta-analysis.

<sup>f</sup> The estimated standard deviation (on log RR scale) of true effects.

<sup>g</sup> The middle 95% area of the estimated effect distribution. 95% PI is reported only in meta-analyses of  $\geq 10$  studies. More information about how to interpret 95% PI can be found in S3 Text (section 3).

<sup>h</sup> The proportion with 95% confidence interval of true effects ( $\theta$ ) below or above a threshold of scientific importance; complementary to 95% PI, these metrics estimate the area of the lower and upper tails of the effect distribution. They are reported only in meta-analyses of  $\geq 10$  studies. More information about how to interpret them can be found in S3 Text (section 3).

**Table Q. Estrogen Plus Progestin Therapy for Secondary Prevention of Multiple Outcomes in Included Systematic Reviews and Meta-Analyses of Observational Epidemiological Studies<sup>a</sup>**

| Outcome <sup>b</sup>         | Timing of EPT | No. of Studies (Cc/Co) | No. of Cases/Population | Metric | Most Precise Study <sup>c</sup> | Summary Effect <sup>d</sup> | P-Value <sup>e</sup> | T <sup>f</sup> | 95% PI <sup>g</sup> | Proportion of True Effects ( $\theta$ ) Below/Above a Threshold (%) <sup>h</sup> |                         |                         |                         |
|------------------------------|---------------|------------------------|-------------------------|--------|---------------------------------|-----------------------------|----------------------|----------------|---------------------|----------------------------------------------------------------------------------|-------------------------|-------------------------|-------------------------|
|                              |               |                        |                         |        |                                 |                             |                      |                |                     | $\hat{P}(\theta < 0.9)$                                                          | $\hat{P}(\theta < 1.0)$ | $\hat{P}(\theta > 1.0)$ | $\hat{P}(\theta > 1.1)$ |
| <b>Neoplasms</b>             |               |                        |                         |        |                                 |                             |                      |                |                     |                                                                                  |                         |                         |                         |
| Lung cancer overall survival | Ever          | 1 (0/1)                | N/A/484                 | RR     | 0.73 (0.60, 0.90)               | N/A                         | N/A                  | N/A            | N/A                 | N/A                                                                              | N/A                     | N/A                     | N/A                     |
| <b>Breast cancer</b>         |               |                        |                         |        |                                 |                             |                      |                |                     |                                                                                  |                         |                         |                         |
| Recurrence                   | Ever          | 2 (0/2)                | 308/1,277               | RR     | 0.86 (0.63, 1.18)               | 0.78 (0.07, 8.26)           | $4.1 \times 10^{-1}$ | 0.14           | N/A                 | N/A                                                                              | N/A                     | N/A                     | N/A                     |
| Specific survival            | Ever          | 4 (0/4)                | 2,116/15,457            | RR     | 0.73 (0.59, 0.91)               | 0.71 (0.45, 1.11)           | $6.8 \times 10^{-2}$ | 0              | N/A                 | N/A                                                                              | N/A                     | N/A                     | N/A                     |
|                              | Current       | 6 (0/6)                | 2,990/25,988            | RR     | 0.69 (0.54, 0.88)               | 0.66 (0.62, 0.72)           | $3.0 \times 10^{-4}$ | 0              | N/A                 | N/A                                                                              | N/A                     | N/A                     | N/A                     |
|                              | Past          | 2 (0/2)                | 1,973/14,180            | RR     | 0.96 (0.61, 1.50)               | 0.87 (0.20, 3.77)           | $4.4 \times 10^{-1}$ | 0              | N/A                 | N/A                                                                              | N/A                     | N/A                     | N/A                     |
| Overall survival             | Ever          | 6 (0/6)                | 8,180/22,932            | RR     | 0.77 (0.68, 0.86)               | 0.73 (0.46, 1.16)           | $1.2 \times 10^{-1}$ | 0.21           | N/A                 | N/A                                                                              | N/A                     | N/A                     | N/A                     |
|                              | Current       | 4 (0/4)                | 5,154/21,890            | RR     | 0.71 (0.63, 0.80)               | 0.71 (0.68, 0.74)           | $9.4 \times 10^{-4}$ | 0              | N/A                 | N/A                                                                              | N/A                     | N/A                     | N/A                     |
|                              | Past          | 1 (0/1)                | 3,953/12,269            | RR     | 1.01 (0.82, 1.24)               | N/A                         | N/A                  | N/A            | N/A                 | N/A                                                                              | N/A                     | N/A                     | N/A                     |

Abbreviations: Cc, case-control study; Co, cohort study; EPT, estrogen plus progestin therapy; N/A, not available or not applicable; PI, prediction interval; RR, risk ratio.

<sup>a</sup> Secondary prevention refers to reducing the risk of recurrence of a disease among individuals who already have that disease.

<sup>b</sup> Incidence unless otherwise indicated.

<sup>c</sup> Point estimate with 95% confidence interval of the study with the smallest standard error in each meta-analysis.

<sup>d</sup> Point estimate with 95% confidence interval of robust random-effects meta-analysis.

<sup>e</sup> P-value of robust random-effects meta-analysis.

<sup>f</sup> The estimated standard deviation (on log RR scale) of true effects.

<sup>g</sup> The middle 95% area of the estimated effect distribution. 95% PI is reported only in meta-analyses of  $\geq 10$  studies. More information about how to interpret 95% PI can be found in S3 Text (section 3).

<sup>h</sup> The proportion with 95% confidence interval of true effects ( $\theta$ ) below or above a threshold of scientific importance; complementary to 95% PI, these metrics estimate the area of the lower and upper tails of the effect distribution. They are reported only in meta-analyses of  $\geq 10$  studies. More information about how to interpret them can be found in S3 Text (section 3).

**Table R. Assessment of Small-Study Effects and Publication Bias: Any Menopausal Hormone Therapy for Primary Prevention of Multiple Outcomes in Included Systematic Reviews and Meta-Analyses of Randomized Controlled Trials**

| Outcome <sup>a</sup>                                                                             | Metric (unit)           | Small-Study Effects <sup>b</sup> | Uncorrected <sup>c</sup> | Vevea & Hedges Selection Model <sup>d</sup> |                      | Severity of Publication Bias ( $\eta$ ) Required to “Explain Away” Results <sup>e</sup> |                                |                                     |                      |                           |
|--------------------------------------------------------------------------------------------------|-------------------------|----------------------------------|--------------------------|---------------------------------------------|----------------------|-----------------------------------------------------------------------------------------|--------------------------------|-------------------------------------|----------------------|---------------------------|
|                                                                                                  |                         |                                  |                          | Corrected                                   | LRT <i>P</i> -Value  | Worst-Case                                                                              | $\eta(\hat{\mu}, \text{null})$ | $\eta(\hat{\mu}^{ci}, \text{null})$ | $\eta(\hat{\mu}, q)$ | $\eta(\hat{\mu}^{ci}, q)$ |
| <b>Neoplasms</b>                                                                                 |                         |                                  |                          |                                             |                      |                                                                                         |                                |                                     |                      |                           |
| All cancer                                                                                       |                         |                                  |                          |                                             |                      |                                                                                         |                                |                                     |                      |                           |
| Incidence                                                                                        | RR                      | No evidence                      | 1.01 (0.70, 1.45)        | N/A                                         | N/A                  | 1.01 (0.70, 1.45)                                                                       | Not possible                   | 1                                   | N/A                  | N/A                       |
| Mortality                                                                                        | RR                      | N/A                              | 1.03 (0.80, 1.34)        | N/A                                         | N/A                  | 1.03 (0.80, 1.34)                                                                       | Not possible                   | 1                                   | N/A                  | N/A                       |
| Colorectal cancer                                                                                |                         |                                  |                          |                                             |                      |                                                                                         |                                |                                     |                      |                           |
| Incidence                                                                                        | RR                      | N/A                              | 0.91 (0.46, 1.77)        | N/A                                         | N/A                  | 0.91 (0.46, 1.77)                                                                       | Not possible                   | 1                                   | N/A                  | N/A                       |
| Mortality                                                                                        | RR                      | N/A                              | 1.09 (0.36, 3.28)        | N/A                                         | N/A                  | 1.09 (0.36, 3.28)                                                                       | Not possible                   | 1                                   | N/A                  | N/A                       |
| Lung cancer                                                                                      |                         |                                  |                          |                                             |                      |                                                                                         |                                |                                     |                      |                           |
| Incidence                                                                                        | RR                      | N/A                              | 1.10 (0.74, 1.63)        | N/A                                         | N/A                  | 1.10 (0.74, 1.63)                                                                       | Not possible                   | 1                                   | 1                    | 1                         |
| Mortality                                                                                        | RR                      | N/A                              | 1.09 (0.98, 1.22)        | N/A                                         | N/A                  | 1.09 (0.98, 1.22)                                                                       | Not possible                   | 1                                   | N/A                  | N/A                       |
| Breast cancer                                                                                    |                         |                                  |                          |                                             |                      |                                                                                         |                                |                                     |                      |                           |
| Incidence                                                                                        | RR                      | No evidence                      | 1.05 (0.71, 1.57)        | N/A                                         | N/A                  | 0.88 (0.34, 2.28)                                                                       | 3                              | 1                                   | N/A                  | N/A                       |
| Mortality                                                                                        | RR                      | N/A                              | 1.03 (0.06, 17.26)       | N/A                                         | N/A                  | 1.03 (0.06, 17.26)                                                                      | Not possible                   | 1                                   | N/A                  | N/A                       |
| Endometrial cancer                                                                               | RR                      | N/A                              | 0.65 (0.17, 2.44)        | N/A                                         | N/A                  | 0.43 (0.07, 2.74)                                                                       | Not possible                   | 1                                   | Not possible         | 1                         |
| Ovarian cancer                                                                                   | RR                      | N/A                              | 1.21 (0.15, 9.77)        | N/A                                         | N/A                  | 1.21 (0.15, 9.77)                                                                       | Not possible                   | 1                                   | Not possible         | 1                         |
| <b>Symptoms, signs or clinical findings of blood, blood-forming organs, or the immune system</b> |                         |                                  |                          |                                             |                      |                                                                                         |                                |                                     |                      |                           |
| C-reactive protein <sup>f</sup>                                                                  | MD (% change)           | Likely                           | 42.28 (18.14, 66.41)     | N/A                                         | N/A                  | 17.81 (-18.60, 54.22)                                                                   | Not possible                   | 2                                   | N/A                  | N/A                       |
| C-reactive protein <sup>g</sup>                                                                  | MD (mg/L)               | N/A                              | 0.35 (-1.27, 1.96)       | N/A                                         | N/A                  | 0.35 (-1.27, 1.96)                                                                      | Not possible                   | 1                                   | N/A                  | N/A                       |
| PAI-1 antigen                                                                                    | MD (% change)           | No evidence                      | -32.19 (-44.38, -20.01)  | N/A                                         | N/A                  | -19.77 (-53.07, 13.54)                                                                  | Not possible                   | 9                                   | N/A                  | N/A                       |
| Fibrinogen                                                                                       | MD (% change)           | No evidence                      | -5.43 (-7.36, -3.49)     | N/A                                         | N/A                  | -4.52 (-6.05, -3.00)                                                                    | Not possible                   | Not possible                        | N/A                  | N/A                       |
| E-selectin                                                                                       | MD (% change)           | N/A                              | -17.63 (-26.74, -8.51)   | N/A                                         | N/A                  | -9.73 (-14.15, -5.32)                                                                   | Not possible                   | Not possible                        | N/A                  | N/A                       |
| <b>Symptoms, signs or clinical findings of endocrine, nutritional or metabolic diseases</b>      |                         |                                  |                          |                                             |                      |                                                                                         |                                |                                     |                      |                           |
| Insulin resistance                                                                               | MD (% change)           | No evidence                      | -14.17 (-21.94, -6.40)   | N/A                                         | N/A                  | -7.33 (-10.85, -3.82)                                                                   | Not possible                   | Not possible                        | N/A                  | N/A                       |
| Total cholesterol <sup>g</sup>                                                                   | MD (mg/dL)              | No evidence                      | -13.20 (-19.69, -6.72)   | N/A                                         | N/A                  | -4.39 (-16.70, 7.91)                                                                    | Not possible                   | 3                                   | N/A                  | N/A                       |
| Total cholesterol <sup>h</sup>                                                                   | MD (mg/dL)              | N/A                              | 8.59 (-4.45, 21.64)      | N/A                                         | N/A                  | 8.59 (-4.45, 21.64)                                                                     | Not possible                   | 1                                   | N/A                  | N/A                       |
| Total cholesterol <sup>i</sup>                                                                   | MD (mmol/L)             | N/A                              | -0.39 (-0.78, -0.01)     | N/A                                         | N/A                  | -0.20 (-1.01, 0.60)                                                                     | Not possible                   | 1                                   | N/A                  | N/A                       |
| HDL cholesterol <sup>g</sup>                                                                     | MD (mg/dL)              | No evidence                      | 1.41 (-3.56, 6.37)       | N/A                                         | N/A                  | -1.15 (-4.83, 2.53)                                                                     | 2                              | 1                                   | N/A                  | N/A                       |
| HDL cholesterol <sup>h</sup>                                                                     | MD (mg/dL)              | N/A                              | 11.68 (-6.43, 29.79)     | N/A                                         | N/A                  | 8.40 (-7.90, 24.70)                                                                     | Not possible                   | 1                                   | N/A                  | N/A                       |
| HDL cholesterol <sup>i</sup>                                                                     | MD (mmol/L)             | N/A                              | -0.05 (-0.17, 0.07)      | N/A                                         | N/A                  | 0.00 (-0.04, 0.03)                                                                      | Not possible                   | 1                                   | N/A                  | N/A                       |
| LDL cholesterol <sup>g</sup>                                                                     | MD (mg/dL)              | No evidence                      | -13.16 (-18.66, -7.67)   | N/A                                         | N/A                  | -5.63 (-16.91, 5.65)                                                                    | Not possible                   | 3                                   | N/A                  | N/A                       |
| LDL cholesterol <sup>h</sup>                                                                     | MD (mg/dL)              | N/A                              | -7.10 (-34.28, 20.07)    | N/A                                         | N/A                  | -7.10 (-34.28, 20.07)                                                                   | Not possible                   | 1                                   | N/A                  | N/A                       |
| LDL cholesterol <sup>i</sup>                                                                     | MD (mmol/L)             | N/A                              | -0.22 (-0.42, -0.01)     | N/A                                         | N/A                  | -0.22 (-0.42, -0.01)                                                                    | Not possible                   | Not possible                        | N/A                  | N/A                       |
| LDL/HDL ratio                                                                                    | MD (% change)           | No evidence                      | -16.25 (-18.83, -13.68)  | -15.43 (-18.80, -12.06)                     | $4.3 \times 10^{-1}$ | -7.52 (-10.93, -4.10)                                                                   | Not possible                   | Not possible                        | N/A                  | N/A                       |
| Lipoprotein (a)                                                                                  | MD (% change)           | No evidence                      | -21.20 (-28.78, -13.62)  | -16.60 (-25.54, -7.65)                      | $6.2 \times 10^{-1}$ | -2.68 (-10.29, 4.94)                                                                    | Not possible                   | >200                                | N/A                  | N/A                       |
| Triglyceride <sup>g</sup>                                                                        | MD (mg/dL)              | No evidence                      | -4.49 (-18.84, 9.87)     | N/A                                         | N/A                  | 5.01 (-3.80, 13.82)                                                                     | 2                              | 1                                   | N/A                  | N/A                       |
| Triglyceride <sup>h</sup>                                                                        | MD (mg/dL)              | N/A                              | 21.08 (-8.20, 50.36)     | N/A                                         | N/A                  | 21.08 (-8.20, 50.36)                                                                    | Not possible                   | 1                                   | N/A                  | N/A                       |
| Triglyceride <sup>i</sup>                                                                        | MD (mmol/L)             | N/A                              | -0.11 (-0.65, 0.43)      | N/A                                         | N/A                  | -0.11 (-0.65, 0.43)                                                                     | Not possible                   | 1                                   | N/A                  | N/A                       |
| Triglyceride <sup>f</sup>                                                                        | MD (% change)           | No evidence                      | 2.39 (-0.69, 5.48)       | 2.37 (-1.35, 6.09)                          | $8.6 \times 10^{-1}$ | 0.00 (-3.41, 3.41)                                                                      | 16                             | 1                                   | N/A                  | N/A                       |
| Body mass index <sup>j</sup>                                                                     | MD (kg/m <sup>2</sup> ) | Likely                           | -0.11 (-0.48, 0.26)      | N/A                                         | N/A                  | -0.11 (-0.48, 0.26)                                                                     | Not possible                   | 1                                   | N/A                  | N/A                       |
| Body mass index <sup>g</sup>                                                                     | MD (kg/m <sup>2</sup> ) | N/A                              | 0.17 (-7.00, 7.35)       | N/A                                         | N/A                  | 0.17 (-7.00, 7.35)                                                                      | Not possible                   | 1                                   | N/A                  | N/A                       |
| Body mass index <sup>i</sup>                                                                     | MD (kg/m <sup>2</sup> ) | N/A                              | -1.05 (-6.67, 4.57)      | N/A                                         | N/A                  | -1.05 (-6.67, 4.57)                                                                     | Not possible                   | 1                                   | N/A                  | N/A                       |
| Body weight                                                                                      | MD (kg)                 | No evidence                      | -0.03 (-0.67, 0.60)      | N/A                                         | N/A                  | -0.01 (-0.66, 0.65)                                                                     | 1                              | 1                                   | N/A                  | N/A                       |
| Abdominal fat                                                                                    | MD (% change)           | N/A                              | -6.89 (-25.53, 11.75)    | N/A                                         | N/A                  | -1.11 (-25.56, 23.35)                                                                   | Not possible                   | 1                                   | N/A                  | N/A                       |
| Waist circumference                                                                              | MD (% change)           | N/A                              | -0.82 (-4.04, 2.39)      | N/A                                         | N/A                  | -0.87 (-1.89, 0.14)                                                                     | Not possible                   | 1                                   | N/A                  | N/A                       |
| Waist/hip ratio                                                                                  | MD                      | N/A                              | 0.00 (0.00, 0.00)        | N/A                                         | N/A                  | 0.00 (0.00, 0.00)                                                                       | 1                              | 1                                   | N/A                  | N/A                       |

|                                                                           |                              |             |                      |                   |                      |                      |              |              |              |              |
|---------------------------------------------------------------------------|------------------------------|-------------|----------------------|-------------------|----------------------|----------------------|--------------|--------------|--------------|--------------|
| BMD of lumbar spine <sup>k</sup>                                          | MD (g/cm <sup>2</sup> /year) | N/A         | 1.26 (-11.48, 14.00) | N/A               | N/A                  | 1.26 (-11.48, 14.00) | Not possible | 1            | N/A          | N/A          |
| BMD of proximal femur <sup>k</sup>                                        | MD (g/cm <sup>2</sup> /year) | N/A         | 2.24 (0.60, 3.89)    | N/A               | N/A                  | 1.95 (-1.83, 5.72)   | Not possible | 4            | N/A          | N/A          |
| <b>Mental or behavioural disorders</b>                                    |                              |             |                      |                   |                      |                      |              |              |              |              |
| Dementia (probable)                                                       | RR                           | N/A         | 1.74 (0.30, 9.97)    | N/A               | N/A                  | 1.49 (0.84, 2.66)    | Not possible | 1            | Not possible | 1            |
| <b>Mental or behavioural symptoms, signs or clinical findings</b>         |                              |             |                      |                   |                      |                      |              |              |              |              |
| Depressive symptom                                                        | SMD                          | N/A         | -0.13 (-0.64, 0.38)  | N/A               | N/A                  | 0.12 (-0.19, 0.43)   | 2            | 1            | N/A          | N/A          |
| <b>Diseases of the nervous system</b>                                     |                              |             |                      |                   |                      |                      |              |              |              |              |
| Cerebrovascular disease                                                   | RR                           | No evidence | 1.25 (1.04, 1.50)    | N/A               | N/A                  | 1.12 (0.93, 1.36)    | Not possible | 1            | Not possible | 1            |
| Stroke                                                                    | RR                           | No evidence | 1.17 (1.05, 1.29)    | N/A               | N/A                  | 1.17 (1.05, 1.29)    | Not possible | Not possible | Not possible | 1            |
| Fatal stroke                                                              | RR                           | N/A         | 1.08 (0.63, 1.83)    | N/A               | N/A                  | 1.08 (0.63, 1.83)    | Not possible | 1            | N/A          | N/A          |
| Non-fatal stroke                                                          | RR                           | No evidence | 1.35 (1.08, 1.69)    | N/A               | N/A                  | 1.21 (0.75, 1.94)    | Not possible | >200         | Not possible | 1            |
| Transient ischaemic attack                                                | RR                           | N/A         | 0.88 (0.30, 2.60)    | N/A               | N/A                  | 0.88 (0.30, 2.60)    | Not possible | 1            | Not possible | 1            |
| Alzheimer disease                                                         | RR                           | N/A         | 1.61 (0.58, 4.46)    | N/A               | N/A                  | 1.61 (0.58, 4.46)    | Not possible | 1            | Not possible | 1            |
| <b>Diseases of the circulatory system</b>                                 |                              |             |                      |                   |                      |                      |              |              |              |              |
| Coronary heart disease                                                    |                              |             |                      |                   |                      |                      |              |              |              |              |
| Incidence                                                                 | RR                           | No evidence | 1.02 (0.82, 1.26)    | N/A               | N/A                  | 1.02 (0.82, 1.26)    | Not possible | 1            | N/A          | N/A          |
| Mortality                                                                 | RR                           | N/A         | 0.96 (0.46, 2.00)    | N/A               | N/A                  | 0.96 (0.46, 2.00)    | Not possible | 1            | N/A          | N/A          |
| MI                                                                        | RR                           | No evidence | 1.06 (0.65, 1.75)    | N/A               | N/A                  | 1.06 (0.65, 1.75)    | Not possible | 1            | N/A          | N/A          |
| Fatal MI                                                                  | RR                           | N/A         | 0.52 (0.12, 2.14)    | N/A               | N/A                  | 0.52 (0.12, 2.14)    | Not possible | 1            | Not possible | 1            |
| Non-fatal MI                                                              | RR                           | N/A         | 1.06 (0.34, 3.30)    | N/A               | N/A                  | 1.06 (0.34, 3.30)    | Not possible | 1            | N/A          | N/A          |
| Angina pectoris                                                           |                              |             |                      |                   |                      |                      |              |              |              |              |
| Any angina                                                                | RR                           | N/A         | 0.90 (0.26, 3.07)    | N/A               | N/A                  | 0.90 (0.26, 3.07)    | Not possible | 1            | 1            | 1            |
| Unstable angina                                                           | RR                           | N/A         | 6.98 (0.36, 135.01)  | N/A               | N/A                  | 6.98 (0.36, 135.01)  | Not possible | 1            | Not possible | 1            |
| Venous thromboembolism                                                    | RR                           | No evidence | 1.60 (0.99, 2.58)    | N/A               | N/A                  | 1.10 (0.47, 2.55)    | Not possible | 6            | Not possible | 1            |
| Deep vein thrombosis                                                      | RR                           | Likely      | 1.39 (0.68, 2.84)    | N/A               | N/A                  | 1.09 (0.22, 5.43)    | Not possible | 1            | Not possible | 1            |
| Pulmonary embolism                                                        | RR                           | N/A         | 1.26 (0.81, 1.94)    | N/A               | N/A                  | 1.18 (0.47, 2.96)    | Not possible | 1            | Not possible | 1            |
| <b>Symptoms, signs or clinical findings of the circulatory system</b>     |                              |             |                      |                   |                      |                      |              |              |              |              |
| Cardiac death                                                             | RR                           | N/A         | 0.96 (0.67, 1.39)    | N/A               | N/A                  | 0.96 (0.67, 1.39)    | Not possible | 1            | N/A          | N/A          |
| Coronary revascularization                                                | RR                           | N/A         | 1.03 (0.90, 1.18)    | N/A               | N/A                  | 1.03 (0.90, 1.18)    | Not possible | 1            | N/A          | N/A          |
| Systolic blood pressure                                                   | MD (mmHg)                    | N/A         | 0.84 (-5.67, 7.36)   | N/A               | N/A                  | -2.24 (-11.09, 6.62) | 1            | 1            | N/A          | N/A          |
| Diastolic blood pressure                                                  | MD (mmHg)                    | N/A         | -0.31 (-2.94, 2.33)  | N/A               | N/A                  | -0.31 (-2.94, 2.33)  | Not possible | 1            | N/A          | N/A          |
| <b>Diseases of the digestive system</b>                                   |                              |             |                      |                   |                      |                      |              |              |              |              |
| Gallbladder disease <sup>l</sup>                                          | RR                           | N/A         | 1.63 (1.31, 2.04)    | N/A               | N/A                  | 1.51 (1.20, 1.90)    | Not possible | Not possible | Not possible | Not possible |
| <b>Diseases of the genitourinary system</b>                               |                              |             |                      |                   |                      |                      |              |              |              |              |
| Endometrial hyperplasia                                                   | RR                           | No evidence | 2.70 (1.15, 6.38)    | N/A               | N/A                  | 1.25 (0.70, 2.21)    | Not possible | 4            | Not possible | 2            |
| Irregular vaginal bleeding                                                | RR                           | N/A         | 1.78 (0.77, 4.10)    | N/A               | N/A                  | 1.07 (0.31, 3.72)    | Not possible | 1            | Not possible | 1            |
| <b>Injury, poisoning or certain other consequences of external causes</b> |                              |             |                      |                   |                      |                      |              |              |              |              |
| All fracture                                                              | RR                           | Likely      | 0.72 (0.62, 0.84)    | 0.74 (0.62, 0.89) | 5.8×10 <sup>-1</sup> | 0.78 (0.58, 1.05)    | Not possible | Not possible | Not possible | 12           |
| Vertebral fracture                                                        | RR                           | No evidence | 0.69 (0.50, 0.94)    | N/A               | N/A                  | 0.74 (0.51, 1.07)    | Not possible | 1            | Not possible | 1            |
| Nonvertebral fracture                                                     | RR                           | No evidence | 0.76 (0.62, 0.94)    | N/A               | N/A                  | 0.85 (0.58, 1.26)    | Not possible | 1            | Not possible | 1            |
| Hip fracture                                                              | RR                           | N/A         | 0.85 (0.57, 1.29)    | N/A               | N/A                  | 0.91 (0.62, 1.35)    | Not possible | 1            | 12           | 1            |
| <b>Functioning assessment</b>                                             |                              |             |                      |                   |                      |                      |              |              |              |              |
| Sleep quality                                                             | SMD                          | N/A         | -0.13 (-0.42, 0.16)  | N/A               | N/A                  | -0.06 (-0.57, 0.45)  | Not possible | 1            | N/A          | N/A          |
| Sexual function                                                           | SMD                          | Likely      | -0.21 (-0.37, -0.05) | N/A               | N/A                  | -0.09 (-0.28, 0.11)  | Not possible | 2            | 1            | 1            |
| Skeletal muscle strength                                                  | SMD                          | N/A         | -0.46 (-1.13, 0.22)  | N/A               | N/A                  | -0.06 (-1.08, 0.95)  | Not possible | 1            | 10           | 1            |
| <b>Others, not elsewhere classified</b>                                   |                              |             |                      |                   |                      |                      |              |              |              |              |
| All-cause mortality                                                       | RR                           | No evidence | 0.99 (0.83, 1.18)    | N/A               | N/A                  | 0.99 (0.83, 1.18)    | Not possible | 1            | N/A          | N/A          |
| Cardiovascular disease                                                    |                              |             |                      |                   |                      |                      |              |              |              |              |
| Incidence                                                                 | RR                           | No evidence | 1.29 (0.99, 1.68)    | N/A               | N/A                  | 1.12 (0.96, 1.31)    | Not possible | 1            | Not possible | 1            |

|           |    |     |                   |     |     |                   |              |   |     |     |
|-----------|----|-----|-------------------|-----|-----|-------------------|--------------|---|-----|-----|
| Mortality | RR | N/A | 0.96 (0.59, 1.57) | N/A | N/A | 1.00 (0.74, 1.34) | Not possible | 1 | N/A | N/A |
|-----------|----|-----|-------------------|-----|-----|-------------------|--------------|---|-----|-----|

Abbreviations: BMD, bone mineral density; HDL, high-density lipoprotein; LDL, low-density lipoprotein; LRT, likelihood-ratio test; MD, mean difference; MI, myocardial infarction; N/A, not available or not applicable; PAI-1, plasminogen activator inhibitor-1; RR, risk ratio; SMD, standardized mean difference.

<sup>a</sup> Incidence unless otherwise indicated.

<sup>b</sup> Egger's regression test is used to examine whether smaller studies tend to show more pronounced effects than larger studies. It is applied only in meta-analyses of  $\geq 10$  studies. More information about how to interpret small-study effects can be found in S3 Text (section 4).

<sup>c</sup> Robust random-effects meta-analysis of all studies.

<sup>d</sup> This model provides: (1) a summary effect estimate corrected for suspected publication bias; (2) a likelihood-ratio test for the presence of publication bias. This model is applied only in meta-analyses of  $\geq 30$  studies. More information can be found in S3 Text (section 5).

<sup>e</sup> This model provides: (1) a summary effect estimate corrected for worst-case publication bias; (2) severity of publication bias ( $\eta$ ) required to attenuate  $\hat{\mu}$  (pooled point estimate) or  $\hat{\mu}^{ci}$  (the limit of 95% confidence interval) to the null or to a non-null value  $q$  (for MD, null = 0; for SMD, null = 0,  $q = -0.2$  or  $0.2$ ; for RR, null = 1.0,  $q = 0.9$  or  $1.1$ ;  $q$  is the value in the same direction of the pooled estimate). A large  $\eta$  would indicate that the meta-analysis result is relatively robust to publication bias, whereas a small  $\eta$  would indicate that the meta-analysis result is relatively sensitive to publication bias.  $\eta$  is conservatively rounded down to the nearest integer; a  $\eta$  of  $\geq 4$  would represent implausibly severe or extreme publication bias; "Not possible" indicates that no value of  $\eta$  could sufficiently attenuate the statistic; "1" indicates that the statistic is already  $\leq$  null or  $q$ . More information on this model can be found in S3 Text (section 5).

<sup>f</sup> In postmenopausal women without diabetes.

<sup>g</sup> In healthy postmenopausal women who used low-dose menopausal hormone therapy.

<sup>h</sup> In postmenopausal women with chronic kidney disease.

<sup>i</sup> In postmenopausal women with diabetes.

<sup>j</sup> In postmenopausal women who used menopausal hormone therapy for at least 3 months.

<sup>k</sup> In postmenopausal women with primary biliary cirrhosis.

<sup>l</sup> Gallbladder disease requiring surgery.

**Table S. Assessment of Small-Study Effects and Publication Bias: Any Menopausal Hormone Therapy for Secondary Prevention of Multiple Outcomes in Included Systematic Reviews and Meta-Analyses of Randomized Controlled Trials**

| Outcome <sup>a</sup>                                                                        | Metric (unit)  | Small-Study Effects <sup>b</sup> | Uncorrected <sup>c</sup> | Vevea & Hedges Selection Model <sup>d</sup> |             | Severity of Publication Bias ( $\eta$ ) Required to “Explain Away” Results <sup>e</sup> |                                |                                     |                      |                           |
|---------------------------------------------------------------------------------------------|----------------|----------------------------------|--------------------------|---------------------------------------------|-------------|-----------------------------------------------------------------------------------------|--------------------------------|-------------------------------------|----------------------|---------------------------|
|                                                                                             |                |                                  |                          | Corrected                                   | LRT P-Value | Worst-Case                                                                              | $\eta(\hat{\mu}, \text{null})$ | $\eta(\hat{\mu}^{ci}, \text{null})$ | $\eta(\hat{\mu}, q)$ | $\eta(\hat{\mu}^{ci}, q)$ |
| <b>Neoplasms</b>                                                                            |                |                                  |                          |                                             |             |                                                                                         |                                |                                     |                      |                           |
| Breast cancer recurrence                                                                    | RR             | N/A                              | 1.51 (0.32, 7.12)        | N/A                                         | N/A         | 1.24 (0.51, 3.00)                                                                       | Not possible                   | 1                                   | Not possible         | 1                         |
| Ovarian cancer OS                                                                           | RR             | N/A                              | 0.87 (0.65, 1.18)        | N/A                                         | N/A         | 0.87 (0.65, 1.18)                                                                       | Not possible                   | 1                                   | Not possible         | 1                         |
| <b>Symptoms, signs or clinical findings of endocrine, nutritional or metabolic diseases</b> |                |                                  |                          |                                             |             |                                                                                         |                                |                                     |                      |                           |
| Fasting glucose                                                                             | MD (mmol/L)    | N/A                              | -0.63 (-2.22, 0.97)      | N/A                                         | N/A         | -0.63 (-2.22, 0.97)                                                                     | Not possible                   | 1                                   | N/A                  | N/A                       |
| Hemoglobin A1c                                                                              | MD (%)         | N/A                              | -0.47 (-0.72, -0.23)     | N/A                                         | N/A         | -0.43 (-0.99, 0.13)                                                                     | Not possible                   | 8                                   | N/A                  | N/A                       |
| <b>Mental or behavioural symptoms, signs or clinical findings</b>                           |                |                                  |                          |                                             |             |                                                                                         |                                |                                     |                      |                           |
| Depressive symptom                                                                          | SMD            | N/A                              | 0.16 (-1.62, 1.94)       | N/A                                         | N/A         | -0.34 (-1.82, 1.13)                                                                     | 1                              | 1                                   | N/A                  | N/A                       |
| <b>Diseases of the nervous system</b>                                                       |                |                                  |                          |                                             |             |                                                                                         |                                |                                     |                      |                           |
| Cerebrovascular disease                                                                     | RR             | N/A                              | 0.63 (0.00, $\infty$ )   | N/A                                         | N/A         | 0.63 (0.00, $\infty$ )                                                                  | Not possible                   | 1                                   | Not possible         | 1                         |
| Stroke                                                                                      | RR             | N/A                              | 0.61 (0.00, $\infty$ )   | N/A                                         | N/A         | 0.61 (0.00, $\infty$ )                                                                  | Not possible                   | 1                                   | Not possible         | 1                         |
| Fatal stroke                                                                                | RR             | N/A                              | 0.82 (0.00, $\infty$ )   | N/A                                         | N/A         | 0.82 (0.00, $\infty$ )                                                                  | Not possible                   | 1                                   | Not possible         | 1                         |
| Non-fatal stroke                                                                            | RR             | N/A                              | 0.95 (0.67, 1.36)        | N/A                                         | N/A         | 0.95 (0.67, 1.36)                                                                       | Not possible                   | 1                                   | N/A                  | N/A                       |
| Transient ischaemic attack                                                                  | RR             | N/A                              | 1.16 (0.70, 1.94)        | N/A                                         | N/A         | 1.16 (0.70, 1.94)                                                                       | Not possible                   | 1                                   | Not possible         | 1                         |
| <b>Diseases of the circulatory system</b>                                                   |                |                                  |                          |                                             |             |                                                                                         |                                |                                     |                      |                           |
| Coronary heart disease                                                                      |                |                                  |                          |                                             |             |                                                                                         |                                |                                     |                      |                           |
| Incidence                                                                                   | RR             | N/A                              | 0.97 (0.76, 1.24)        | N/A                                         | N/A         | 0.97 (0.76, 1.24)                                                                       | Not possible                   | 1                                   | N/A                  | N/A                       |
| Mortality                                                                                   | RR             | N/A                              | 1.02 (0.26, 4.05)        | N/A                                         | N/A         | 1.02 (0.26, 4.05)                                                                       | Not possible                   | 1                                   | N/A                  | N/A                       |
| MI                                                                                          | RR             | N/A                              | 0.93 (0.76, 1.15)        | N/A                                         | N/A         | 0.93 (0.76, 1.15)                                                                       | Not possible                   | 1                                   | N/A                  | N/A                       |
| Fatal MI                                                                                    | RR             | N/A                              | 0.84 (0.08, 9.49)        | N/A                                         | N/A         | 0.84 (0.08, 9.49)                                                                       | Not possible                   | 1                                   | Not possible         | 1                         |
| Non-fatal MI                                                                                | RR             | N/A                              | 0.96 (0.43, 2.15)        | N/A                                         | N/A         | 0.96 (0.43, 2.15)                                                                       | Not possible                   | 1                                   | N/A                  | N/A                       |
| Angina pectoris                                                                             |                |                                  |                          |                                             |             |                                                                                         |                                |                                     |                      |                           |
| Any angina                                                                                  | RR             | N/A                              | 0.91 (0.64, 1.29)        | N/A                                         | N/A         | 0.91 (0.64, 1.29)                                                                       | Not possible                   | 1                                   | N/A                  | N/A                       |
| Unstable angina                                                                             | RR             | N/A                              | 0.97 (0.51, 1.83)        | N/A                                         | N/A         | 0.97 (0.51, 1.83)                                                                       | Not possible                   | 1                                   | N/A                  | N/A                       |
| Venous thromboembolism                                                                      | RR             | N/A                              | 7.77 (1.00, 60.53)       | N/A                                         | N/A         | 7.77 (1.00, 60.53)                                                                      | Not possible                   | 1                                   | Not possible         | 1                         |
| Deep vein thrombosis                                                                        | RR             | N/A                              | 8.75 (0.48, 159.53)      | N/A                                         | N/A         | 8.75 (0.48, 159.53)                                                                     | Not possible                   | 1                                   | Not possible         | 1                         |
| Pulmonary embolism                                                                          | RR             | N/A                              | 2.92 (0.31, 27.35)       | N/A                                         | N/A         | 2.92 (0.31, 27.35)                                                                      | Not possible                   | 1                                   | Not possible         | 1                         |
| <b>Symptoms, signs or clinical findings of the circulatory system</b>                       |                |                                  |                          |                                             |             |                                                                                         |                                |                                     |                      |                           |
| Cardiac death                                                                               | RR             | N/A                              | 1.04 (0.33, 3.30)        | N/A                                         | N/A         | 1.04 (0.33, 3.30)                                                                       | Not possible                   | 1                                   | N/A                  | N/A                       |
| Coronary revascularization                                                                  | RR             | N/A                              | 0.98 (0.29, 3.33)        | N/A                                         | N/A         | 0.98 (0.29, 3.33)                                                                       | Not possible                   | 1                                   | N/A                  | N/A                       |
| <b>Diseases of the genitourinary system</b>                                                 |                |                                  |                          |                                             |             |                                                                                         |                                |                                     |                      |                           |
| RUTI                                                                                        | RR             | N/A                              | 0.58 (0.11, 2.99)        | N/A                                         | N/A         | 1.06 (0.67, 1.65)                                                                       | 30                             | 1                                   | 9                    | 1                         |
| Vaginal atrophy                                                                             | RR             | N/A                              | 0.31 (0.12, 0.81)        | N/A                                         | N/A         | 0.32 (0.00, $\infty$ )                                                                  | Not possible                   | 1                                   | Not possible         | 1                         |
| <b>Symptoms, signs or clinical findings of the genitourinary system</b>                     |                |                                  |                          |                                             |             |                                                                                         |                                |                                     |                      |                           |
| Vasomotor symptom                                                                           | MD (freq/week) | N/A                              | -17.92 (-23.80, -12.04)  | N/A                                         | N/A         | -11.40 (-22.99, 0.19)                                                                   | Not possible                   | 5                                   | N/A                  | N/A                       |
| Vasomotor symptom severity                                                                  | SMD            | N/A                              | -1.36 (-1.95, -0.76)     | N/A                                         | N/A         | N/A                                                                                     | N/A                            | N/A                                 | N/A                  | N/A                       |
| Urinary incontinence                                                                        | RR             | Likely                           | 0.82 (0.62, 1.09)        | N/A                                         | N/A         | 1.02 (0.81, 1.29)                                                                       | Not possible                   | 1                                   | 3                    | 1                         |
| <b>Functioning assessment</b>                                                               |                |                                  |                          |                                             |             |                                                                                         |                                |                                     |                      |                           |
| Sleep quality                                                                               | SMD            | N/A                              | 0.00 (-3.49, 3.50)       | N/A                                         | N/A         | 0.00 (-3.49, 3.50)                                                                      | 1                              | 1                                   | N/A                  | N/A                       |
| <b>Others, not elsewhere classified</b>                                                     |                |                                  |                          |                                             |             |                                                                                         |                                |                                     |                      |                           |
| Cardiovascular disease                                                                      |                |                                  |                          |                                             |             |                                                                                         |                                |                                     |                      |                           |
| Incidence                                                                                   | RR             | No evidence                      | 1.08 (0.94, 1.25)        | N/A                                         | N/A         | 1.08 (0.94, 1.25)                                                                       | Not possible                   | 1                                   | N/A                  | N/A                       |
| Mortality                                                                                   | RR             | N/A                              | 1.06 (0.62, 1.80)        | N/A                                         | N/A         | 1.06 (0.62, 1.80)                                                                       | Not possible                   | 1                                   | N/A                  | N/A                       |

Abbreviations: freq, frequency; LRT, likelihood-ratio test; MD, mean difference; MI, myocardial infarction; N/A, not available or not applicable; OS, overall survival; RR, risk ratio; RUTI, recurrent urinary tract infection; SMD, standardized mean difference.

<sup>a</sup> Incidence unless otherwise indicated.

<sup>b</sup> Egger's regression test is used to examine whether smaller studies tend to show more pronounced effects than larger studies. It is applied only in meta-analyses of  $\geq 10$  studies. More information about how to interpret small-study effects can be found in S3 Text (section 4).

<sup>c</sup> Robust random-effects meta-analysis of all studies.

<sup>d</sup> This model provides: (1) a summary effect estimate corrected for suspected publication bias; (2) a likelihood-ratio test for the presence of publication bias. This model is applied only in meta-analyses of  $\geq 30$  studies. More information can be found in S3 Text (section 5).

<sup>e</sup> This model provides: (1) a summary effect estimate corrected for worst-case publication bias; (2) severity of publication bias ( $\eta$ ) required to attenuate  $\hat{\mu}$  (pooled point estimate) or  $\hat{\mu}^{ci}$  (the limit of 95% confidence interval) to the null or to a non-null value  $q$  (for MD, null = 0; for SMD, null = 0,  $q = -0.2$  or  $0.2$ ; for RR, null = 1.0,  $q = 0.9$  or  $1.1$ ;  $q$  is the value in the same direction of the pooled estimate). A large  $\eta$  would indicate that the meta-analysis result is relatively robust to publication bias, whereas a small  $\eta$  would indicate that the meta-analysis result is relatively sensitive to publication bias.  $\eta$  is conservatively rounded down to the nearest integer; a  $\eta$  of  $\geq 4$  would represent implausibly severe or extreme publication bias; "Not possible" indicates that no value of  $\eta$  could sufficiently attenuate the statistic; "1" indicates that the statistic is already  $\leq$  null or  $q$ . More information on this model can be found in S3 Text (section 5).



**Table T. Assessment of Small-Study Effects and Publication Bias: Any Menopausal Hormone Therapy for Primary Prevention of Multiple Outcomes in Included Systematic Reviews and Meta-Analyses of Observational Epidemiological Studies**

| Outcome <sup>a</sup>                 | Timing of MHT | Metric | Small-Study Effects <sup>b</sup> | Uncorrected <sup>c</sup> | Vevea & Hedges Selection Model <sup>d</sup> |                      | Severity of Publication Bias ( $\eta$ ) Required to “Explain Away” Results <sup>e</sup> |                        |                             |                      |                           |
|--------------------------------------|---------------|--------|----------------------------------|--------------------------|---------------------------------------------|----------------------|-----------------------------------------------------------------------------------------|------------------------|-----------------------------|----------------------|---------------------------|
|                                      |               |        |                                  |                          | Corrected                                   | LRT P-Value          | Worst-Case                                                                              | $\eta(\hat{\mu}, 1.0)$ | $\eta(\hat{\mu}^{ci}, 1.0)$ | $\eta(\hat{\mu}, q)$ | $\eta(\hat{\mu}^{ci}, q)$ |
| <b>Neoplasms</b>                     |               |        |                                  |                          |                                             |                      |                                                                                         |                        |                             |                      |                           |
| Cutaneous melanoma                   | Ever          | RR     | N/A                              | 1.23 (0.90, 1.68)        | N/A                                         | N/A                  | 1.03 (0.81, 1.32)                                                                       | Not possible           | 1                           | 3                    | 1                         |
| Glioma                               | Ever          | RR     | Likely                           | 0.87 (0.72, 1.04)        | N/A                                         | N/A                  | 0.94 (0.80, 1.10)                                                                       | Not possible           | 1                           | 6                    | 1                         |
|                                      | Current       | RR     | N/A                              | 0.82 (0.60, 1.13)        | N/A                                         | N/A                  | 0.96 (0.78, 1.17)                                                                       | Not possible           | 1                           | 11                   | 1                         |
|                                      | Past          | RR     | N/A                              | 0.94 (0.75, 1.19)        | N/A                                         | N/A                  | 0.94 (0.75, 1.19)                                                                       | Not possible           | 1                           | N/A                  | N/A                       |
| Meningioma                           | Ever          | RR     | No evidence                      | 1.14 (0.98, 1.33)        | N/A                                         | N/A                  | 0.96 (0.79, 1.17)                                                                       | 6                      | 1                           | 1                    | 1                         |
|                                      | Current       | RR     | No evidence                      | 1.22 (1.02, 1.46)        | N/A                                         | N/A                  | 0.88 (0.54, 1.42)                                                                       | 25                     | 1                           | 6                    | 1                         |
|                                      | Past          | RR     | No evidence                      | 1.15 (0.98, 1.37)        | N/A                                         | N/A                  | 1.09 (0.94, 1.27)                                                                       | Not possible           | 1                           | 5                    | 1                         |
| Thyroid cancer                       | Ever          | RR     | No evidence                      | 1.09 (0.88, 1.34)        | N/A                                         | N/A                  | 1.01 (0.81, 1.27)                                                                       | Not possible           | 1                           | N/A                  | N/A                       |
|                                      | Current       | RR     | N/A                              | 1.11 (0.76, 1.61)        | N/A                                         | N/A                  | 1.02 (0.57, 1.81)                                                                       | Not possible           | 1                           | 1                    | 1                         |
|                                      | Past          | RR     | N/A                              | 1.01 (0.51, 1.99)        | N/A                                         | N/A                  | 1.01 (0.51, 1.99)                                                                       | Not possible           | 1                           | N/A                  | N/A                       |
| Esophageal cancer                    | Ever          | RR     | N/A                              | 0.70 (0.60, 0.81)        | N/A                                         | N/A                  | 0.72 (0.58, 0.90)                                                                       | Not possible           | Not possible                | Not possible         | 19                        |
|                                      | Current       | RR     | N/A                              | 0.68 (0.62, 0.74)        | N/A                                         | N/A                  | 0.67 (0.00, $\infty$ )                                                                  | Not possible           | Not possible                | Not possible         | Not possible              |
|                                      | Past          | RR     | N/A                              | 0.72 (0.35, 1.50)        | N/A                                         | N/A                  | 0.80 (0.00, $\infty$ )                                                                  | Not possible           | 1                           | Not possible         | 1                         |
| Gastric cancer                       | Ever          | RR     | N/A                              | 0.78 (0.70, 0.86)        | N/A                                         | N/A                  | 0.78 (0.70, 0.86)                                                                       | Not possible           | Not possible                | Not possible         | Not possible              |
|                                      | Current       | RR     | N/A                              | 0.75 (0.27, 2.06)        | N/A                                         | N/A                  | 0.75 (0.27, 2.06)                                                                       | Not possible           | 1                           | Not possible         | 1                         |
|                                      | Past          | RR     | N/A                              | 0.84 (0.61, 1.16)        | N/A                                         | N/A                  | 0.84 (0.61, 1.16)                                                                       | Not possible           | 1                           | Not possible         | 1                         |
| Colorectal cancer                    | Ever          | RR     | No evidence                      | 0.83 (0.77, 0.89)        | N/A                                         | N/A                  | 0.92 (0.88, 0.97)                                                                       | Not possible           | Not possible                | 5                    | 1                         |
|                                      | Current       | RR     | No evidence                      | 0.77 (0.71, 0.83)        | N/A                                         | N/A                  | 0.89 (0.83, 0.95)                                                                       | Not possible           | Not possible                | Not possible         | 4                         |
|                                      | Past          | RR     | No evidence                      | 0.88 (0.81, 0.97)        | N/A                                         | N/A                  | 0.94 (0.88, 1.01)                                                                       | Not possible           | 12                          | 1                    | 1                         |
| Pancreatic cancer                    | Ever          | RR     | No evidence                      | 0.96 (0.82, 1.13)        | N/A                                         | N/A                  | 1.00 (0.87, 1.15)                                                                       | 4                      | 1                           | N/A                  | N/A                       |
|                                      | Current       | RR     | N/A                              | 0.86 (0.40, 1.87)        | N/A                                         | N/A                  | 0.98 (0.06, 17.50)                                                                      | Not possible           | 1                           | 1                    | 1                         |
|                                      | Past          | RR     | N/A                              | 0.89 (0.43, 1.83)        | N/A                                         | N/A                  | 0.89 (0.43, 1.83)                                                                       | Not possible           | 1                           | Not possible         | 1                         |
| Primary liver cancer                 | Ever          | RR     | N/A                              | 0.65 (0.30, 1.39)        | N/A                                         | N/A                  | 1.15 (0.98, 1.34)                                                                       | 9                      | 1                           | 4                    | 1                         |
|                                      | Current       | RR     | N/A                              | 1.03 (0.03, 35.31)       | N/A                                         | N/A                  | 1.03 (0.03, 35.31)                                                                      | Not possible           | 1                           | N/A                  | N/A                       |
|                                      | Past          | RR     | N/A                              | 0.88 (0.00, 437.84)      | N/A                                         | N/A                  | 1.41 (0.95, 2.09)                                                                       | 1                      | 1                           | 1                    | 1                         |
| Lung cancer                          | Ever          | RR     | No evidence                      | 0.95 (0.85, 1.05)        | N/A                                         | N/A                  | 1.00 (0.92, 1.09)                                                                       | 5                      | 1                           | N/A                  | N/A                       |
|                                      | Current       | RR     | N/A                              | 0.93 (0.78, 1.12)        | N/A                                         | N/A                  | 1.00 (0.86, 1.17)                                                                       | 2                      | 1                           | N/A                  | N/A                       |
|                                      | Past          | RR     | N/A                              | 0.93 (0.88, 0.99)        | N/A                                         | N/A                  | 0.93 (0.88, 0.99)                                                                       | Not possible           | Not possible                | N/A                  | N/A                       |
| <b>Breast cancer</b>                 |               |        |                                  |                          |                                             |                      |                                                                                         |                        |                             |                      |                           |
| Incidence                            | Ever          | RR     | No evidence                      | 1.25 (1.19, 1.31)        | 1.26 (1.17, 1.34)                           | $8.8 \times 10^{-1}$ | 1.07 (1.03, 1.11)                                                                       | Not possible           | Not possible                | 10                   | 3                         |
|                                      | Current       | RR     | No evidence                      | 1.43 (1.33, 1.55)        | 1.48 (1.33, 1.65)                           | $3.9 \times 10^{-1}$ | 1.10 (1.01, 1.19)                                                                       | Not possible           | 43                          | 47                   | 5                         |
|                                      | Past          | RR     | No evidence                      | 1.04 (1.00, 1.08)        | 1.04 (1.00, 1.08)                           | $9.4 \times 10^{-1}$ | 1.02 (0.98, 1.05)                                                                       | Not possible           | 1                           | N/A                  | N/A                       |
| Mortality                            | Ever          | RR     | No evidence                      | 0.95 (0.79, 1.13)        | N/A                                         | N/A                  | 1.00 (0.79, 1.26)                                                                       | Not possible           | 1                           | N/A                  | N/A                       |
|                                      | Current       | RR     | N/A                              | 1.01 (0.79, 1.29)        | N/A                                         | N/A                  | 0.90 (0.71, 1.15)                                                                       | 1                      | 1                           | N/A                  | N/A                       |
|                                      | Past          | RR     | N/A                              | 0.90 (0.76, 1.07)        | N/A                                         | N/A                  | 0.96 (0.84, 1.09)                                                                       | Not possible           | 1                           | 1                    | 1                         |
| <b>Endometrial cancer</b>            |               |        |                                  |                          |                                             |                      |                                                                                         |                        |                             |                      |                           |
| Incidence                            | Ever          | RR     | Likely                           | 2.10 (1.70, 2.59)        | N/A                                         | N/A                  | 1.12 (0.47, 2.66)                                                                       | Not possible           | 11                          | Not possible         | 7                         |
|                                      | Current       | RR     | Likely                           | 3.18 (1.84, 5.48)        | N/A                                         | N/A                  | 1.05 (0.85, 1.30)                                                                       | Not possible           | 17                          | Not possible         | 5                         |
|                                      | Past          | RR     | No evidence                      | 1.56 (1.14, 2.15)        | N/A                                         | N/A                  | 1.04 (0.83, 1.29)                                                                       | Not possible           | 5                           | 63                   | 1                         |
| Mortality                            | Ever          | RR     | N/A                              | 2.60 (0.44, 15.50)       | N/A                                         | N/A                  | 2.60 (0.44, 15.50)                                                                      | Not possible           | 1                           | Not possible         | 1                         |
| Ovarian cancer                       | Ever          | RR     | No evidence                      | 1.16 (1.06, 1.26)        | 1.13 (1.00, 1.27)                           | $5.9 \times 10^{-1}$ | 1.07 (0.97, 1.19)                                                                       | Not possible           | 3                           | 3                    | 1                         |
|                                      | Current       | RR     | No evidence                      | 1.24 (1.08, 1.44)        | N/A                                         | N/A                  | 1.02 (0.79, 1.31)                                                                       | Not possible           | 1                           | 4                    | 1                         |
|                                      | Past          | RR     | No evidence                      | 1.06 (0.95, 1.17)        | N/A                                         | N/A                  | 1.01 (0.95, 1.08)                                                                       | Not possible           | 1                           | N/A                  | N/A                       |
| <b>Diseases of the immune system</b> |               |        |                                  |                          |                                             |                      |                                                                                         |                        |                             |                      |                           |

|                                                     |         |    |             |                     |     |     |                    |              |     |              |     |
|-----------------------------------------------------|---------|----|-------------|---------------------|-----|-----|--------------------|--------------|-----|--------------|-----|
| Systemic lupus erythematosus                        | Ever    | RR | N/A         | 1.62 (0.67, 3.91)   | N/A | N/A | 1.34 (0.08, 23.30) | Not possible | 1   | Not possible | 1   |
|                                                     | Current | RR | N/A         | 1.53 (0.80, 2.94)   | N/A | N/A | 1.53 (0.80, 2.94)  | Not possible | 1   | Not possible | 1   |
|                                                     | Past    | RR | N/A         | 1.77 (0.29, 10.88)  | N/A | N/A | 1.14 (0.66, 1.94)  | Not possible | 1   | Not possible | 1   |
| <b>Endocrine, nutritional or metabolic diseases</b> |         |    |             |                     |     |     |                    |              |     |              |     |
| Diabetes mellitus                                   | Ever    | RR | N/A         | 0.81 (0.02, 28.81)  | N/A | N/A | 1.11 (0.67, 1.83)  | 5            | 1   | 2            | 1   |
|                                                     | Current | RR | N/A         | 0.61 (0.00, 606.60) | N/A | N/A | 1.10 (0.49, 2.48)  | 12           | 1   | 5            | 1   |
|                                                     | Past    | RR | N/A         | 0.90 (0.14, 5.96)   | N/A | N/A | 0.90 (0.14, 5.96)  | Not possible | 1   | 1            | 1   |
| <b>Mental or behavioural disorders</b>              |         |    |             |                     |     |     |                    |              |     |              |     |
| Dementia                                            | Ever    | RR | N/A         | 0.94 (0.69, 1.28)   | N/A | N/A | 0.94 (0.69, 1.28)  | Not possible | 1   | N/A          | N/A |
|                                                     | Current | RR | N/A         | 1.23 (0.34, 4.37)   | N/A | N/A | 1.23 (0.34, 4.37)  | Not possible | 1   | Not possible | 1   |
|                                                     | Past    | RR | N/A         | 0.74 (0.35, 1.55)   | N/A | N/A | 0.74 (0.35, 1.55)  | Not possible | 1   | Not possible | 1   |
| <b>Diseases of the nervous system</b>               |         |    |             |                     |     |     |                    |              |     |              |     |
| Parkinson disease                                   | Ever    | RR | N/A         | 1.04 (0.79, 1.36)   | N/A | N/A | 0.97 (0.66, 1.42)  | Not possible | 1   | N/A          | N/A |
|                                                     | Current | RR | N/A         | 1.23 (0.97, 1.57)   | N/A | N/A | 1.17 (0.90, 1.51)  | Not possible | 1   | Not possible | 1   |
|                                                     | Past    | RR | N/A         | 1.23 (0.81, 1.87)   | N/A | N/A | 1.23 (0.81, 1.87)  | Not possible | 1   | Not possible | 1   |
| Alzheimer disease                                   | Ever    | RR | No evidence | 0.78 (0.63, 0.95)   | N/A | N/A | 0.89 (0.71, 1.11)  | Not possible | 1   | Not possible | 1   |
|                                                     | Current | RR | N/A         | 1.12 (0.68, 1.83)   | N/A | N/A | 1.12 (0.68, 1.83)  | Not possible | 1   | Not possible | 1   |
|                                                     | Past    | RR | N/A         | 0.64 (0.04, 9.40)   | N/A | N/A | 1.03 (0.00, ∞)     | > 200        | 1   | 5            | 1   |
| <b>Diseases of the visual system</b>                |         |    |             |                     |     |     |                    |              |     |              |     |
| Cataract                                            | Ever    | RR | N/A         | 0.87 (0.79, 0.97)   | N/A | N/A | 0.92 (0.83, 1.01)  | Not possible | 1   | 1            | 1   |
|                                                     | Current | RR | N/A         | 0.88 (0.79, 0.98)   | N/A | N/A | 0.90 (0.80, 1.02)  | Not possible | 1   | 45           | 1   |
|                                                     | Past    | RR | N/A         | 0.99 (0.94, 1.05)   | N/A | N/A | 0.99 (0.94, 1.05)  | Not possible | 1   | N/A          | N/A |
| <b>Diseases of the circulatory system</b>           |         |    |             |                     |     |     |                    |              |     |              |     |
| Coronary heart disease                              |         |    |             |                     |     |     |                    |              |     |              |     |
| Incidence                                           | Ever    | RR | No evidence | 0.82 (0.69, 0.96)   | N/A | N/A | 0.96 (0.78, 1.18)  | Not possible | 1   | 6            | 1   |
|                                                     | Current | RR | N/A         | 0.74 (0.62, 0.89)   | N/A | N/A | 0.86 (0.66, 1.13)  | Not possible | 4   | Not possible | 1   |
|                                                     | Past    | RR | N/A         | 0.87 (0.71, 1.05)   | N/A | N/A | 0.95 (0.66, 1.37)  | Not possible | 1   | 2            | 1   |
| Mortality                                           | Ever    | RR | N/A         | 0.67 (0.25, 1.81)   | N/A | N/A | 1.14 (0.53, 2.44)  | 15           | 1   | 7            | 1   |
|                                                     | Current | RR | N/A         | 0.60 (0.33, 1.08)   | N/A | N/A | 0.91 (0.27, 2.99)  | Not possible | 1   | > 200        | 1   |
|                                                     | Past    | RR | N/A         | 0.81 (0.53, 1.26)   | N/A | N/A | 0.93 (0.60, 1.45)  | Not possible | 1   | 10           | 1   |
| Venous thromboembolism                              | Ever    | RR | N/A         | 1.99 (1.53, 2.58)   | N/A | N/A | 1.65 (0.99, 2.74)  | Not possible | 2   | Not possible | 1   |
|                                                     | Current | RR | N/A         | 2.08 (1.40, 3.07)   | N/A | N/A | 1.19 (0.47, 2.98)  | Not possible | 33  | Not possible | 33  |
|                                                     | Past    | RR | N/A         | 1.17 (0.96, 1.43)   | N/A | N/A | 1.17 (0.96, 1.43)  | Not possible | 1   | Not possible | 1   |
| Deep vein thrombosis                                | Current | RR | N/A         | 2.26 (1.14, 4.49)   | N/A | N/A | N/A                | N/A          | N/A | N/A          | N/A |
| Pulmonary embolism                                  | Ever    | RR | N/A         | 1.65 (0.99, 2.74)   | N/A | N/A | 1.65 (0.99, 2.74)  | Not possible | 1   | Not possible | 1   |
|                                                     | Current | RR | N/A         | 2.05 (1.49, 2.83)   | N/A | N/A | 1.99 (0.54, 7.39)  | Not possible | 3   | Not possible | 2   |
|                                                     | Past    | RR | N/A         | 1.30 (0.70, 2.40)   | N/A | N/A | 1.30 (0.70, 2.40)  | Not possible | 1   | Not possible | 1   |
| <b>Diseases of the respiratory system</b>           |         |    |             |                     |     |     |                    |              |     |              |     |
| Asthma                                              | Ever    | RR | N/A         | 1.41 (1.09, 1.81)   | N/A | N/A | 1.08 (0.71, 1.65)  | Not possible | 2   | 129          | 1   |
|                                                     | Current | RR | N/A         | 1.48 (1.02, 2.13)   | N/A | N/A | 1.23 (0.70, 2.17)  | Not possible | 1   | Not possible | 1   |
|                                                     | Past    | RR | N/A         | 1.37 (1.08, 1.73)   | N/A | N/A | 1.12 (0.56, 2.23)  | Not possible | 12  | Not possible | 1   |
| <b>Diseases of the digestive system</b>             |         |    |             |                     |     |     |                    |              |     |              |     |
| Cholelithiasis                                      | Ever    | RR | N/A         | 1.63 (1.41, 1.88)   | N/A | N/A | 1.22 (0.67, 2.23)  | Not possible | 14  | Not possible | 13  |
|                                                     | Current | RR | N/A         | 1.89 (1.58, 2.27)   | N/A | N/A | N/A                | N/A          | N/A | N/A          | N/A |
|                                                     | Past    | RR | N/A         | 1.40 (1.23, 1.59)   | N/A | N/A | 0.97 (0.64, 1.46)  | > 200        | 7   | 133          | 1   |
| <b>Others, not elsewhere classified</b>             |         |    |             |                     |     |     |                    |              |     |              |     |
| All-cause mortality                                 | Ever    | RR | N/A         | 0.89 (0.82, 0.97)   | N/A | N/A | 0.89 (0.78, 1.02)  | Not possible | 1   | Not possible | 1   |
|                                                     | Current | RR | N/A         | 0.79 (0.66, 0.95)   | N/A | N/A | 0.89 (0.73, 1.10)  | Not possible | 2   | Not possible | 1   |
|                                                     | Past    | RR | N/A         | 0.92 (0.82, 1.03)   | N/A | N/A | 0.96 (0.76, 1.22)  | Not possible | 1   | N/A          | N/A |

| Cardiovascular disease |         |    |     |                   |     |     |                    |              |   |              |   |
|------------------------|---------|----|-----|-------------------|-----|-----|--------------------|--------------|---|--------------|---|
| Incidence              | Ever    | RR | N/A | 1.11 (0.56, 2.22) | N/A | N/A | 1.11 (0.56, 2.22)  | Not possible | 1 | Not possible | 1 |
|                        | Current | RR | N/A | 0.90 (0.11, 7.22) | N/A | N/A | 1.07 (0.87, 1.32)  | 4            | 1 | 1            | 1 |
|                        | Past    | RR | N/A | 1.11 (0.89, 1.39) | N/A | N/A | 1.11 (0.89, 1.39)  | Not possible | 1 | Not possible | 1 |
| Mortality              | Ever    | RR | N/A | 0.65 (0.40, 1.06) | N/A | N/A | 0.81 (0.02, 40.26) | Not possible | 1 | Not possible | 1 |
|                        | Current | RR | N/A | 0.50 (0.18, 1.40) | N/A | N/A | 0.72 (0.00, ∞)     | Not possible | 1 | Not possible | 1 |
|                        | Past    | RR | N/A | 0.88 (0.59, 1.31) | N/A | N/A | 0.88 (0.59, 1.31)  | Not possible | 1 | Not possible | 1 |

Abbreviations: LRT, likelihood-ratio test; MHT, menopausal hormone therapy; N/A, not available or not applicable; RR, risk ratio.

<sup>a</sup> Incidence unless otherwise indicated.

<sup>b</sup> Egger's regression test is used to examine whether smaller studies tend to show more pronounced effects than larger studies. It is applied only in meta-analyses of  $\geq 10$  studies. More information about how to interpret small-study effects can be found in S3 Text (section 4).

<sup>c</sup> Robust random-effects meta-analysis of all studies.

<sup>d</sup> This model provides: (1) a summary effect estimate corrected for suspected publication bias; (2) a likelihood-ratio test for the presence of publication bias. This model is applied only in meta-analyses of  $\geq 30$  studies. More information can be found in S3 Text (section 5).

<sup>e</sup> This model provides: (1) a summary effect estimate corrected for worst-case publication bias; (2) severity of publication bias ( $\eta$ ) required to attenuate  $\hat{\mu}$  (pooled point estimate) or  $\hat{\mu}^{ci}$  (the limit of 95% confidence interval) to the null or to a non-null value  $q$  (for RR, null = 1.0,  $q = 0.9$  or  $1.1$ ;  $q$  is the value in the same direction of the pooled estimate). A large  $\eta$  would indicate that the meta-analysis result is relatively robust to publication bias, whereas a small  $\eta$  would indicate that the meta-analysis result is relatively sensitive to publication bias.  $\eta$  is conservatively rounded down to the nearest integer; a  $\eta$  of  $\geq 4$  would represent implausibly severe or extreme publication bias; "Not possible" indicates that no value of  $\eta$  could sufficiently attenuate the statistic; "1" indicates that the statistic is already  $\leq$  null or  $q$ . More information on this model can be found in S3 Text (section 5).

**Table U. Sensitivity Analysis for Residual Confounding: Any Menopausal Hormone Therapy for Primary Prevention of Multiple Outcomes in Included Systematic Reviews and Meta-Analyses of Observational Epidemiological Studies**

| Outcome <sup>a</sup> | Timing of MHT | Metric | Summary Effect <sup>b</sup> | Severity of Residual Confounding Required to “Explain Away” Results <sup>c</sup> |                          |                   |                        |                           |                         |
|----------------------|---------------|--------|-----------------------------|----------------------------------------------------------------------------------|--------------------------|-------------------|------------------------|---------------------------|-------------------------|
|                      |               |        |                             | $E(\hat{\mu}, 1.0)$                                                              | $E(\hat{\mu}^{ci}, 1.0)$ | $E(\hat{\mu}, q)$ | $E(\hat{\mu}^{ci}, q)$ | $\hat{T}/\hat{G}(r, 1.0)$ | $\hat{T}/\hat{G}(r, q)$ |
| <b>Neoplasms</b>     |               |        |                             |                                                                                  |                          |                   |                        |                           |                         |
| Cutaneous melanoma   | Ever          | RR     | 1.23 (0.90, 1.68)           | 1.77                                                                             | 1                        | 1.49              | 1                      | N/A                       | N/A                     |
| Glioma               | Ever          | RR     | 0.87 (0.72, 1.04)           | N/A                                                                              | N/A                      | N/A               | N/A                    | 1.28/1.88                 | 1.15/1.57               |
|                      | Current       | RR     | 0.82 (0.60, 1.13)           | 1.73                                                                             | 1                        | 1.41              | 1                      | N/A                       | N/A                     |
|                      | Past          | RR     | 0.94 (0.75, 1.19)           | 1.31                                                                             | 1                        | N/A               | N/A                    | N/A                       | N/A                     |
| Meningioma           | Ever          | RR     | 1.14 (0.98, 1.33)           | N/A                                                                              | N/A                      | N/A               | N/A                    | 1.29/1.90                 | 1.18/1.64               |
|                      | Current       | RR     | 1.22 (1.02, 1.46)           | N/A                                                                              | N/A                      | N/A               | N/A                    | 1.32/1.97                 | 1.20/1.69               |
|                      | Past          | RR     | 1.15 (0.98, 1.37)           | N/A                                                                              | N/A                      | N/A               | N/A                    | 1.16/1.59                 | 1.06/1.31               |
| Thyroid cancer       | Ever          | RR     | 1.09 (0.88, 1.34)           | N/A                                                                              | N/A                      | N/A               | N/A                    | 1.14/1.54                 | 1.04/1.24               |
|                      | Current       | RR     | 1.11 (0.76, 1.61)           | 1.45                                                                             | 1                        | 1.08              | 1                      | N/A                       | N/A                     |
|                      | Past          | RR     | 1.01 (0.51, 1.99)           | 1.09                                                                             | 1                        | N/A               | N/A                    | N/A                       | N/A                     |
| Esophageal cancer    | Ever          | RR     | 0.70 (0.60, 0.81)           | 2.22                                                                             | 1.78                     | 1.90              | 1.47                   | N/A                       | N/A                     |
|                      | Current       | RR     | 0.68 (0.62, 0.74)           | 2.31                                                                             | 2.06                     | 1.99              | 1.75                   | N/A                       | N/A                     |
|                      | Past          | RR     | 0.72 (0.35, 1.50)           | 2.11                                                                             | 1                        | 1.79              | 1                      | N/A                       | N/A                     |
| Gastric cancer       | Ever          | RR     | 0.78 (0.70, 0.86)           | 1.90                                                                             | 1.60                     | 1.59              | 1.27                   | N/A                       | N/A                     |
|                      | Current       | RR     | 0.75 (0.27, 2.06)           | 2.00                                                                             | 1                        | 1.69              | 1                      | N/A                       | N/A                     |
|                      | Past          | RR     | 0.84 (0.61, 1.16)           | 1.66                                                                             | 1                        | 1.34              | 1                      | N/A                       | N/A                     |
| Colorectal cancer    | Ever          | RR     | 0.83 (0.77, 0.89)           | N/A                                                                              | N/A                      | N/A               | N/A                    | 1.48/2.32                 | 1.33/1.99               |
|                      | Current       | RR     | 0.77 (0.71, 0.83)           | N/A                                                                              | N/A                      | N/A               | N/A                    | 1.47/2.30                 | 1.32/1.97               |
|                      | Past          | RR     | 0.88 (0.81, 0.97)           | N/A                                                                              | N/A                      | N/A               | N/A                    | 1.29/1.90                 | 1.16/1.59               |
| Pancreatic cancer    | Ever          | RR     | 0.96 (0.82, 1.13)           | N/A                                                                              | N/A                      | N/A               | N/A                    | 1.15/1.57                 | 1.03/1.21               |
|                      | Current       | RR     | 0.86 (0.40, 1.87)           | 1.59                                                                             | 1                        | 1.26              | 1                      | N/A                       | N/A                     |
|                      | Past          | RR     | 0.89 (0.43, 1.83)           | 1.49                                                                             | 1                        | 1.10              | 1                      | N/A                       | N/A                     |
| Primary liver cancer | Ever          | RR     | 0.65 (0.30, 1.39)           | 2.46                                                                             | 1                        | 2.13              | 1                      | N/A                       | N/A                     |
|                      | Current       | RR     | 1.03 (0.03, 35.31)          | 1.22                                                                             | 1                        | N/A               | N/A                    | N/A                       | N/A                     |
|                      | Past          | RR     | 0.88 (0.00, 437.84)         | 1.54                                                                             | 1                        | 1.19              | 1                      | N/A                       | N/A                     |
| Lung cancer          | Ever          | RR     | 0.95 (0.85, 1.05)           | N/A                                                                              | N/A                      | N/A               | N/A                    | 1.19/1.67                 | 1.07/1.34               |
|                      | Current       | RR     | 0.93 (0.78, 1.12)           | 1.34                                                                             | 1                        | N/A               | N/A                    | N/A                       | N/A                     |
|                      | Past          | RR     | 0.93 (0.88, 0.99)           | 1.36                                                                             | 1.11                     | N/A               | N/A                    | N/A                       | N/A                     |
| <b>Breast cancer</b> |               |        |                             |                                                                                  |                          |                   |                        |                           |                         |
| Incidence            | Ever          | RR     | 1.25 (1.19, 1.31)           | N/A                                                                              | N/A                      | N/A               | N/A                    | 1.57/2.52                 | 1.42/2.19               |
|                      | Current       | RR     | 1.43 (1.33, 1.55)           | N/A                                                                              | N/A                      | N/A               | N/A                    | 1.93/3.27                 | 1.76/2.92               |

|                                                     |         |    |                     |      |      |      |     |           |           |
|-----------------------------------------------------|---------|----|---------------------|------|------|------|-----|-----------|-----------|
|                                                     | Past    | RR | 1.04 (1.00, 1.08)   | N/A  | N/A  | N/A  | N/A | 1.11/1.46 | 1.01/1.11 |
| Mortality                                           | Ever    | RR | 0.95 (0.79, 1.13)   | N/A  | N/A  | N/A  | N/A | 1.19/1.67 | 1.07/1.34 |
|                                                     | Current | RR | 1.01 (0.79, 1.29)   | 1.11 | 1    | N/A  | N/A | N/A       | N/A       |
|                                                     | Past    | RR | 0.90 (0.76, 1.07)   | 1.47 | 1    | 1.03 | 1   | N/A       | N/A       |
| <b>Endometrial cancer</b>                           |         |    |                     |      |      |      |     |           |           |
| Incidence                                           | Ever    | RR | 2.10 (1.70, 2.59)   | N/A  | N/A  | N/A  | N/A | 3.98/7.42 | 3.61/6.68 |
|                                                     | Current | RR | 3.18 (1.84, 5.48)   | N/A  | N/A  | N/A  | N/A | 2.04/3.50 | 1.85/3.10 |
|                                                     | Past    | RR | 1.56 (1.14, 2.15)   | N/A  | N/A  | N/A  | N/A | 1.90/3.21 | 1.73/2.85 |
| Mortality                                           | Ever    | RR | 2.60 (0.44, 15.50)  | 4.64 | 1    | 4.16 | 1   | N/A       | N/A       |
| Ovarian cancer                                      | Ever    | RR | 1.16 (1.06, 1.26)   | N/A  | N/A  | N/A  | N/A | 1.35/2.04 | 1.23/1.76 |
|                                                     | Current | RR | 1.24 (1.08, 1.44)   | N/A  | N/A  | N/A  | N/A | 1.52/2.41 | 1.38/2.10 |
|                                                     | Past    | RR | 1.06 (0.95, 1.17)   | N/A  | N/A  | N/A  | N/A | 1.13/1.51 | 1.03/1.21 |
| <b>Diseases of the immune system</b>                |         |    |                     |      |      |      |     |           |           |
| Systemic lupus erythematosus                        | Ever    | RR | 1.62 (0.67, 3.91)   | 2.62 | 1    | 2.30 | 1   | N/A       | N/A       |
|                                                     | Current | RR | 1.53 (0.80, 2.94)   | 2.44 | 1    | 2.14 | 1   | N/A       | N/A       |
|                                                     | Past    | RR | 1.77 (0.29, 10.88)  | 2.94 | 1    | 2.60 | 1   | N/A       | N/A       |
| <b>Endocrine, nutritional or metabolic diseases</b> |         |    |                     |      |      |      |     |           |           |
| Diabetes mellitus                                   | Ever    | RR | 0.81 (0.02, 28.81)  | 1.78 | 1    | 1.47 | 1   | N/A       | N/A       |
|                                                     | Current | RR | 0.61 (0.00, 606.60) | 2.66 | 1    | 2.31 | 1   | N/A       | N/A       |
|                                                     | Past    | RR | 0.90 (0.14, 5.96)   | 1.46 | 1    | 1.02 | 1   | N/A       | N/A       |
| <b>Mental or behavioural disorders</b>              |         |    |                     |      |      |      |     |           |           |
| Dementia                                            | Ever    | RR | 0.94 (0.69, 1.28)   | 1.32 | 1    | N/A  | N/A | N/A       | N/A       |
|                                                     | Current | RR | 1.23 (0.34, 4.37)   | 1.76 | 1    | 1.48 | 1   | N/A       | N/A       |
|                                                     | Past    | RR | 0.74 (0.35, 1.55)   | 2.04 | 1    | 1.73 | 1   | N/A       | N/A       |
| <b>Diseases of the nervous system</b>               |         |    |                     |      |      |      |     |           |           |
| Parkinson disease                                   | Ever    | RR | 1.04 (0.79, 1.36)   | 1.24 | 1    | N/A  | N/A | N/A       | N/A       |
|                                                     | Current | RR | 1.23 (0.97, 1.57)   | 1.77 | 1    | 1.49 | 1   | N/A       | N/A       |
|                                                     | Past    | RR | 1.23 (0.81, 1.87)   | 1.76 | 1    | 1.48 | 1   | N/A       | N/A       |
| Alzheimer disease                                   | Ever    | RR | 0.78 (0.63, 0.95)   | N/A  | N/A  | N/A  | N/A | 1.57/2.52 | 1.41/2.17 |
|                                                     | Current | RR | 1.12 (0.68, 1.83)   | 1.48 | 1    | 1.15 | 1   | N/A       | N/A       |
|                                                     | Past    | RR | 0.64 (0.04, 9.40)   | 2.47 | 1    | 2.14 | 1   | N/A       | N/A       |
| <b>Diseases of the visual system</b>                |         |    |                     |      |      |      |     |           |           |
| Cataract                                            | Ever    | RR | 0.87 (0.79, 0.97)   | 1.56 | 1.22 | 1.22 | 1   | N/A       | N/A       |
|                                                     | Current | RR | 0.88 (0.79, 0.98)   | 1.53 | 1.16 | 1.18 | 1   | N/A       | N/A       |
|                                                     | Past    | RR | 0.99 (0.94, 1.05)   | 1.09 | 1    | N/A  | N/A | N/A       | N/A       |
| <b>Diseases of the circulatory system</b>           |         |    |                     |      |      |      |     |           |           |

|                                           |         |    |                   |      |      |      |      |           |           |
|-------------------------------------------|---------|----|-------------------|------|------|------|------|-----------|-----------|
| <b>Coronary heart disease</b>             |         |    |                   |      |      |      |      |           |           |
| Incidence                                 | Ever    | RR | 0.82 (0.69, 0.96) | N/A  | N/A  | N/A  | N/A  | 1.36/2.06 | 1.22/1.74 |
|                                           | Current | RR | 0.74 (0.62, 0.89) | 2.04 | 1.51 | 1.73 | 1.15 | N/A       | N/A       |
|                                           | Past    | RR | 0.87 (0.71, 1.05) | 1.58 | 1    | 1.24 | 1    | N/A       | N/A       |
| Mortality                                 | Ever    | RR | 0.67 (0.25, 1.81) | 2.37 | 1    | 2.04 | 1    | N/A       | N/A       |
|                                           | Current | RR | 0.60 (0.33, 1.08) | 2.73 | 1    | 2.37 | 1    | N/A       | N/A       |
|                                           | Past    | RR | 0.81 (0.53, 1.26) | 1.76 | 1    | 1.45 | 1    | N/A       | N/A       |
| Venous thromboembolism                    | Ever    | RR | 1.99 (1.53, 2.58) | 3.39 | 2.43 | 3.02 | 2.13 | N/A       | N/A       |
|                                           | Current | RR | 2.08 (1.40, 3.07) | 3.57 | 2.15 | 3.18 | 1.86 | N/A       | N/A       |
|                                           | Past    | RR | 1.17 (0.96, 1.43) | 1.62 | 1    | 1.33 | 1    | N/A       | N/A       |
| Deep vein thrombosis                      | Current | RR | 2.26 (1.14, 4.49) | 3.95 | 1.54 | 3.53 | 1.24 | N/A       | N/A       |
| Pulmonary embolism                        | Ever    | RR | 1.65 (0.99, 2.74) | 2.69 | 1    | 2.37 | 1    | N/A       | N/A       |
|                                           | Current | RR | 2.05 (1.49, 2.83) | 3.52 | 2.34 | 3.13 | 2.04 | N/A       | N/A       |
|                                           | Past    | RR | 1.30 (0.70, 2.40) | 1.92 | 1    | 1.65 | 1    | N/A       | N/A       |
| <b>Diseases of the respiratory system</b> |         |    |                   |      |      |      |      |           |           |
| Asthma                                    | Ever    | RR | 1.41 (1.09, 1.81) | 2.16 | 1.42 | 1.88 | 1    | N/A       | N/A       |
|                                           | Current | RR | 1.48 (1.02, 2.13) | 2.31 | 1.17 | 2.02 | 1    | N/A       | N/A       |
|                                           | Past    | RR | 1.37 (1.08, 1.73) | 2.08 | 1.39 | 1.80 | 1    | N/A       | N/A       |
| <b>Diseases of the digestive system</b>   |         |    |                   |      |      |      |      |           |           |
| Cholelithiasis                            | Ever    | RR | 1.63 (1.41, 1.88) | 2.64 | 2.17 | 2.32 | 1.88 | N/A       | N/A       |
|                                           | Current | RR | 1.89 (1.58, 2.27) | 3.20 | 2.54 | 2.84 | 2.24 | N/A       | N/A       |
|                                           | Past    | RR | 1.40 (1.23, 1.59) | 2.14 | 1.75 | 1.85 | 1.47 | N/A       | N/A       |
| <b>Others, not elsewhere classified</b>   |         |    |                   |      |      |      |      |           |           |
| All-cause mortality                       | Ever    | RR | 0.89 (0.82, 0.97) | 1.50 | 1.22 | 1.12 | 1    | N/A       | N/A       |
|                                           | Current | RR | 0.79 (0.66, 0.95) | 1.84 | 1.30 | 1.54 | 1    | N/A       | N/A       |
|                                           | Past    | RR | 0.92 (0.82, 1.03) | 1.40 | 1    | N/A  | N/A  | N/A       | N/A       |
| <b>Cardiovascular disease</b>             |         |    |                   |      |      |      |      |           |           |
| Incidence                                 | Ever    | RR | 1.11 (0.56, 2.22) | 1.46 | 1    | 1.12 | 1    | N/A       | N/A       |
|                                           | Current | RR | 0.90 (0.11, 7.22) | 1.47 | 1    | 1.06 | 1    | N/A       | N/A       |
|                                           | Past    | RR | 1.11 (0.89, 1.39) | 1.46 | 1    | 1.10 | 1    | N/A       | N/A       |
| Mortality                                 | Ever    | RR | 0.65 (0.40, 1.06) | 2.44 | 1    | 2.11 | 1    | N/A       | N/A       |
|                                           | Current | RR | 0.50 (0.18, 1.40) | 3.44 | 1    | 3.02 | 1    | N/A       | N/A       |
|                                           | Past    | RR | 0.88 (0.59, 1.31) | 1.53 | 1    | 1.18 | 1    | N/A       | N/A       |

Abbreviations: MHT, menopausal hormone therapy; N/A, not available or not applicable; RR, risk ratio.

<sup>a</sup> Incidence unless otherwise indicated.

<sup>b</sup> Point estimate with 95% confidence interval of robust random-effects meta-analysis.

<sup>c</sup> E-value: the minimum strength of association, on RR scale, that residual confounding would need to have with both the exposure and outcome, conditional on the measured covariates, to attenuate  $\hat{\mu}$  (pooled point estimate) or  $\hat{\mu}^{ci}$  (the limit of 95% confidence interval) to the null or to a non-null value  $q$ ;  $\hat{T}/\hat{G}(r, q)$ : the minimum bias factor on RR scale,  $\hat{T}(r, q)$ , or the minimum confounding association strength,  $\hat{G}(r, q)$ , in all studies that would be required to reduce to less than  $r$  the proportion of studies with true effect sizes exceeding the null or a non-null value  $q$ , conditional on the measured covariates. null = 1.0,  $q = 0.9$  or  $1.1$  ( $q$  is the value in the same direction of the pooled estimate);  $r = 0.1$  and  $0.2$  for meta-analyses of  $\geq 16$  studies and of  $10$ – $15$  studies, respectively. A large E-value or  $\hat{T}/\hat{G}(r, q)$  would indicate that the meta-analysis result is relatively robust to residual confounding, whereas a small E-value or  $\hat{T}/\hat{G}(r, q)$  would indicate that the meta-analysis result is relatively sensitive to residual confounding. The E-value is reported in meta-analyses of  $< 10$  studies, whereas  $\hat{T}/\hat{G}(r, q)$  are reported in meta-analyses of  $\geq 10$  studies. More information on these metrics can be found in S3 Text (section 6).

**Table V. Assessment of Small-Study Effects and Publication Bias: Any Menopausal Hormone Therapy for Secondary Prevention of Multiple Outcomes in Included Systematic Reviews and Meta-Analyses of Observational Epidemiological Studies**

| Outcome <sup>a</sup>         | Timing of MHT | Metric | Small-Study Effects <sup>b</sup> | Uncorrected <sup>c</sup> | Vevea & Hedges Selection Model <sup>d</sup> |             | Severity of Publication Bias ( $\eta$ ) Required to “Explain Away” Results <sup>e</sup> |                        |                             |                      |                           |
|------------------------------|---------------|--------|----------------------------------|--------------------------|---------------------------------------------|-------------|-----------------------------------------------------------------------------------------|------------------------|-----------------------------|----------------------|---------------------------|
|                              |               |        |                                  |                          | Corrected                                   | LRT P-Value | Worst-Case                                                                              | $\eta(\hat{\mu}, 1.0)$ | $\eta(\hat{\mu}^{ci}, 1.0)$ | $\eta(\hat{\mu}, q)$ | $\eta(\hat{\mu}^{ci}, q)$ |
| <b>Neoplasms</b>             |               |        |                                  |                          |                                             |             |                                                                                         |                        |                             |                      |                           |
| Lung cancer overall survival | Ever          | RR     | N/A                              | 1.06 (0.45, 2.51)        | N/A                                         | N/A         | 0.90 (0.12, 6.74)                                                                       | 1                      | 1                           | N/A                  | N/A                       |
|                              | Current       | RR     | N/A                              | 0.91 (0.76, 1.09)        | N/A                                         | N/A         | 0.91 (0.76, 1.09)                                                                       | Not possible           | 1                           | N/A                  | N/A                       |
| <b>Breast cancer</b>         |               |        |                                  |                          |                                             |             |                                                                                         |                        |                             |                      |                           |
| Recurrence                   | Ever          | RR     | N/A                              | 0.69 (0.29, 1.61)        | N/A                                         | N/A         | N/A                                                                                     | N/A                    | N/A                         | N/A                  | N/A                       |
| Specific survival            | Ever          | RR     | Likely                           | 0.72 (0.59, 0.88)        | N/A                                         | N/A         | 0.82 (0.73, 0.93)                                                                       | Not possible           | Not possible                | Not possible         | 2                         |
|                              | Current       | RR     | Likely                           | 0.74 (0.62, 0.88)        | N/A                                         | N/A         | 0.80 (0.71, 0.91)                                                                       | Not possible           | Not possible                | Not possible         | > 200                     |
|                              | Past          | RR     | N/A                              | 0.91 (0.70, 1.18)        | N/A                                         | N/A         | 0.94 (0.78, 1.13)                                                                       | Not possible           | 1                           | N/A                  | N/A                       |
| Overall survival             | Ever          | RR     | Likely                           | 0.82 (0.75, 0.89)        | N/A                                         | N/A         | 0.93 (0.80, 1.08)                                                                       | Not possible           | 5                           | 13                   | 1                         |
|                              | Current       | RR     | N/A                              | 0.79 (0.73, 0.86)        | N/A                                         | N/A         | 0.86 (0.62, 1.18)                                                                       | Not possible           | 10                          | Not possible         | 1                         |
|                              | Past          | RR     | N/A                              | 0.92 (0.73, 1.16)        | N/A                                         | N/A         | 0.98 (0.58, 1.67)                                                                       | Not possible           | 1                           | N/A                  | N/A                       |
| <b>Ovarian cancer</b>        |               |        |                                  |                          |                                             |             |                                                                                         |                        |                             |                      |                           |
| Recurrence                   | Ever          | RR     | N/A                              | 0.87 (0.33, 2.29)        | N/A                                         | N/A         | 0.87 (0.33, 2.29)                                                                       | Not possible           | 1                           | Not possible         | 1                         |
| Overall survival             | Ever          | RR     | N/A                              | 0.81 (0.71, 0.91)        | N/A                                         | N/A         | 0.81 (0.71, 0.91)                                                                       | Not possible           | Not possible                | Not possible         | 1                         |

Abbreviations: LRT, likelihood-ratio test; MHT, menopausal hormone therapy; N/A, not available or not applicable; RR, risk ratio.

<sup>a</sup> Incidence unless otherwise indicated.

<sup>b</sup> Egger’s regression test is used to examine whether smaller studies tend to show more pronounced effects than larger studies. It is applied only in meta-analyses of  $\geq 10$  studies. More information about how to interpret small-study effects can be found in S3 Text (section 4).

<sup>c</sup> Robust random-effects meta-analysis of all studies.

<sup>d</sup> This model provides: (1) a summary effect estimate corrected for suspected publication bias; (2) a likelihood-ratio test for the presence of publication bias. This model is applied only in meta-analyses of  $\geq 30$  studies. More information can be found in S3 Text (section 5).

<sup>e</sup> This model provides: (1) a summary effect estimate corrected for worst-case publication bias; (2) severity of publication bias ( $\eta$ ) required to attenuate  $\hat{\mu}$  (pooled point estimate) or  $\hat{\mu}^{ci}$  (the limit of 95% confidence interval) to the null or to a non-null value  $q$  (for RR, null = 1.0,  $q = 0.9$  or  $1.1$ ;  $q$  is the value in the same direction of the pooled estimate). A large  $\eta$  would indicate that the meta-analysis result is relatively robust to publication bias, whereas a small  $\eta$  would indicate that the meta-analysis result is relatively sensitive to publication bias.  $\eta$  is conservatively rounded down to the nearest integer; a  $\eta$  of  $\geq 4$  would represent implausibly severe or extreme publication bias; “Not possible” indicates that no value of  $\eta$  could sufficiently attenuate the statistic; “1” indicates that the statistic is already  $\leq$  null or  $q$ . More information on this model can be found in S3 Text (section 5).



**Table W. Sensitivity Analysis for Residual Confounding: Any Menopausal Hormone Therapy for Secondary Prevention of Multiple Outcomes in Included Systematic Reviews and Meta-Analyses of Observational Epidemiological Studies**

| Outcome <sup>a</sup>         | Timing of MHT | Metric | Summary Effect <sup>b</sup> | Severity of Residual Confounding Required to “Explain Away” Results <sup>c</sup> |                          |                   |                        |                           |                         |
|------------------------------|---------------|--------|-----------------------------|----------------------------------------------------------------------------------|--------------------------|-------------------|------------------------|---------------------------|-------------------------|
|                              |               |        |                             | $E(\hat{\mu}, 1.0)$                                                              | $E(\hat{\mu}^{ci}, 1.0)$ | $E(\hat{\mu}, q)$ | $E(\hat{\mu}^{ci}, q)$ | $\hat{T}/\hat{G}(r, 1.0)$ | $\hat{T}/\hat{G}(r, q)$ |
| <b>Neoplasms</b>             |               |        |                             |                                                                                  |                          |                   |                        |                           |                         |
| Lung cancer overall survival | Ever          | RR     | 1.06 (0.45, 2.51)           | 1.31                                                                             | 1                        | N/A               | N/A                    | N/A                       | N/A                     |
|                              | Current       | RR     | 0.91 (0.76, 1.09)           | 1.43                                                                             | 1                        | N/A               | N/A                    | N/A                       | N/A                     |
| <b>Breast cancer</b>         |               |        |                             |                                                                                  |                          |                   |                        |                           |                         |
| Recurrence                   | Ever          | RR     | 0.69 (0.29, 1.61)           | 2.26                                                                             | 1                        | 1.94              | 1                      | N/A                       | N/A                     |
| Specific survival            | Ever          | RR     | 0.72 (0.59, 0.88)           | N/A                                                                              | N/A                      | N/A               | N/A                    | 1.75/2.90                 | 1.58/2.54               |
|                              | Current       | RR     | 0.74 (0.62, 0.88)           | N/A                                                                              | N/A                      | N/A               | N/A                    | 1.51/2.39                 | 1.36/2.06               |
|                              | Past          | RR     | 0.91 (0.70, 1.18)           | 1.43                                                                             | 1                        | N/A               | N/A                    | N/A                       | N/A                     |
| Overall survival             | Ever          | RR     | 0.82 (0.75, 0.89)           | N/A                                                                              | N/A                      | N/A               | N/A                    | 1.43/2.21                 | 1.29/1.90               |
|                              | Current       | RR     | 0.79 (0.73, 0.86)           | 1.84                                                                             | 1.60                     | 1.53              | 1.27                   | N/A                       | N/A                     |
|                              | Past          | RR     | 0.92 (0.73, 1.16)           | 1.39                                                                             | 1                        | N/A               | N/A                    | N/A                       | N/A                     |
| <b>Ovarian cancer</b>        |               |        |                             |                                                                                  |                          |                   |                        |                           |                         |
| Recurrence                   | Ever          | RR     | 0.87 (0.33, 2.29)           | 1.56                                                                             | 1                        | 1.22              | 1                      | N/A                       | N/A                     |
| Overall survival             | Ever          | RR     | 0.81 (0.71, 0.91)           | 1.78                                                                             | 1.42                     | 1.47              | 1                      | N/A                       | N/A                     |

Abbreviations: MHT, menopausal hormone therapy; N/A, not available or not applicable; RR, risk ratio.

<sup>a</sup> Incidence unless otherwise indicated.

<sup>b</sup> Point estimate with 95% confidence interval of robust random-effects meta-analysis.

<sup>c</sup> E-value: the minimum strength of association, on RR scale, that residual confounding would need to have with both the exposure and outcome, conditional on the measured covariates, to attenuate  $\hat{\mu}$  (pooled point estimate) or  $\hat{\mu}^{ci}$  (the limit of 95% confidence interval) to the null or to a non-null value  $q$ ;  $\hat{T}/\hat{G}(r, q)$ : the minimum bias factor on RR scale,  $\hat{T}(r, q)$ , or the minimum confounding association strength,  $\hat{G}(r, q)$ , in all studies that would be required to reduce to less than  $r$  the proportion of studies with true effect sizes exceeding the null or a non-null value  $q$ , conditional on the measured covariates. null = 1.0,  $q = 0.9$  or  $1.1$  ( $q$  is the value in the same direction of the pooled estimate);  $r = 0.1$  and  $0.2$  for meta-analyses of  $\geq 16$  studies and of  $10$ – $15$  studies, respectively. A large E-value or  $\hat{T}/\hat{G}(r, q)$  would indicate that the meta-analysis result is relatively robust to residual confounding, whereas a small E-value or  $\hat{T}/\hat{G}(r, q)$  would indicate that the meta-analysis result is relatively sensitive to residual confounding. The E-value is reported in meta-analyses of  $< 10$  studies, whereas  $\hat{T}/\hat{G}(r, q)$  are reported in meta-analyses of  $\geq 10$  studies. More information on these metrics can be found in S3 Text (section 6).

Table X. Summary of Results for Outcomes with No Available Data for Meta-Analysis

| Outcome <sup>a</sup>                                                                             | Reference                   | Study Design  | No. of Studies | Population          | Intervention /Exposure <sup>b</sup> | Key Findings/Conclusions                                                                                                                                                                                 |
|--------------------------------------------------------------------------------------------------|-----------------------------|---------------|----------------|---------------------|-------------------------------------|----------------------------------------------------------------------------------------------------------------------------------------------------------------------------------------------------------|
| <b>Neoplasms</b>                                                                                 |                             |               |                |                     |                                     |                                                                                                                                                                                                          |
| Head and neck cancer                                                                             | McCarthy 2017 <sup>37</sup> | CO/CC         | 3              | PPM                 | Any MHT                             | MHT was associated with a reduced risk of head and neck cancer, but the evidence was inconclusive                                                                                                        |
| <b>Diseases of the musculoskeletal system or connective tissue</b>                               |                             |               |                |                     |                                     |                                                                                                                                                                                                          |
| Osteoarthritis                                                                                   | de Klerk 2009 <sup>67</sup> | RCT/CO /CC/CS | 19             | PPM                 | Any MHT                             | Most evidence pointed in the direction of no relation between osteoarthritis and exogenous hormone use; there was some evidence for a protective effect of unopposed estrogen use for hip osteoarthritis |
| <b>Symptoms, signs or clinical findings of blood, blood-forming organs, or the immune system</b> |                             |               |                |                     |                                     |                                                                                                                                                                                                          |
| Immunological factors                                                                            | Abdi 2016 <sup>9</sup>      | Unclear       | 13             | PM                  | Unclear                             | MHT induced significant changes in immunological mediators, such as reduced levels of IL-2, IL-6, and IGF-1 as well as increased levels of IL-1 and IL-4                                                 |
| Protein C                                                                                        | Salpeter 2006 <sup>7</sup>  | RCT           | Unclear        | PM without diabetes | E/EP $\geq$ 2 mo <sup>c</sup>       | There was no evidence that MHT has effect on protein C: MD (% change) -0.80, 95% CI: -4.20 to 2.60                                                                                                       |
| Protein S                                                                                        | Salpeter 2006 <sup>7</sup>  | RCT           | Unclear        | PM without diabetes | E/EP $\geq$ 2 mo <sup>c</sup>       | Oral MHT reduced protein S: MD (% change) -8.60, 95% CI: -13.10 to -4.10; no significant difference between opposed and unopposed estrogen                                                               |
| <b>Endocrine, nutritional or metabolic diseases</b>                                              |                             |               |                |                     |                                     |                                                                                                                                                                                                          |
| Diabetes mellitus                                                                                | Salpeter 2006 <sup>7</sup>  | RCT           | Unclear        | PM                  | E/EP $\geq$ 2 mo <sup>c</sup>       | MHT reduced the risk of diabetes mellitus: RR 0.70, 95% CI: 0.60 to 0.90                                                                                                                                 |
| <b>Symptoms, signs or clinical findings of endocrine, nutritional or metabolic diseases</b>      |                             |               |                |                     |                                     |                                                                                                                                                                                                          |
| Fasting glucose                                                                                  | Salpeter 2006 <sup>7</sup>  | RCT           | Unclear        | PM with diabetes    | E/EP $\geq$ 2 mo <sup>c</sup>       | MHT reduced fasting glucose: MD (% change) -11.50, 95% CI: -18.00 to -5.10                                                                                                                               |
| Fasting glucose                                                                                  | Salpeter 2006 <sup>7</sup>  | RCT           | Unclear        | PM without diabetes | E/EP $\geq$ 2 mo <sup>c</sup>       | MHT reduced fasting glucose: MD (% change) -2.50, 95% CI: -3.50 to -1.50                                                                                                                                 |

|                                                                       |                            |       |         |                     |                               |                                                                                                                                                                        |
|-----------------------------------------------------------------------|----------------------------|-------|---------|---------------------|-------------------------------|------------------------------------------------------------------------------------------------------------------------------------------------------------------------|
| Fasting insulin                                                       | Salpeter 2006 <sup>7</sup> | RCT   | Unclear | PM with diabetes    | E/EP $\geq 2$ mo <sup>c</sup> | MHT reduced fasting insulin: MD (% change) -20.20, 95% CI: -36.30 to -4.20                                                                                             |
| Fasting insulin                                                       | Salpeter 2006 <sup>7</sup> | RCT   | Unclear | PM without diabetes | E/EP $\geq 2$ mo <sup>c</sup> | MHT reduced fasting insulin: MD (% change) -9.30, 95% CI: -13.70 to -4.90                                                                                              |
| Insulin resistance                                                    | Salpeter 2006 <sup>7</sup> | RCT   | Unclear | PM with diabetes    | E/EP $\geq 2$ mo <sup>c</sup> | MHT reduced insulin resistance: MD (% change) -35.80, 95% CI: -51.70 to -19.80                                                                                         |
| HDL cholesterol                                                       | Salpeter 2006 <sup>7</sup> | RCT   | Unclear | PM without diabetes | E/EP $\geq 2$ mo <sup>c</sup> | MHT increased HDL cholesterol: MD (% change) 5.10, 95% CI: 3.60 to 6.70                                                                                                |
| LDL cholesterol                                                       | Salpeter 2006 <sup>7</sup> | RCT   | Unclear | PM without diabetes | E/EP $\geq 2$ mo <sup>c</sup> | MHT reduced LDL cholesterol: MD (% change) -11.00, 95% CI: -12.30 to -9.60                                                                                             |
| Lean body mass                                                        | Salpeter 2006 <sup>7</sup> | RCT   | Unclear | PM without diabetes | E/EP $\geq 2$ mo <sup>c</sup> | MHT increased lean body mass: MD (% change) 3.30, 95% CI: 0.02 to 6.60                                                                                                 |
| Bone mineral density of lumbar spine                                  | Wells 2002 <sup>14</sup>   | RCT   | 21      | PM                  | E/EP                          | MHT increased bone mineral density of lumbar spine at 2 yr: MD (% change) 6.76, 95% CI: 5.63 to 7.89; no significant difference between opposed and unopposed estrogen |
| Bone mineral density of forearm                                       | Wells 2002 <sup>14</sup>   | RCT   | 14      | PM                  | E/EP                          | MHT increased bone mineral density of forearm at 2 yr: MD (% change) 4.53, 95% CI: 3.68 to 5.36; no significant difference between opposed and unopposed estrogen      |
| Bone mineral density of femoral neck                                  | Wells 2002 <sup>14</sup>   | RCT   | 9       | PM                  | E/EP                          | MHT increased bone mineral density of femoral neck at 2 yr: MD (% change) 4.12, 95% CI: 3.45 to 4.80; no significant difference between opposed and unopposed estrogen |
| <b>Symptoms, signs or clinical findings of the circulatory system</b> |                            |       |         |                     |                               |                                                                                                                                                                        |
| Mean blood pressure                                                   | Salpeter 2006 <sup>7</sup> | RCT   | Unclear | PM without diabetes | E/EP $\geq 2$ mo <sup>c</sup> | MHT produced a small reduction in mean blood pressure: MD (% change) -1.70, 95% CI: -2.90 to -0.50                                                                     |
| <b>Functioning assessment</b>                                         |                            |       |         |                     |                               |                                                                                                                                                                        |
| Cognitive function                                                    | Lethaby 2008 <sup>30</sup> | DBRCT | 16      | Healthy PM          | E/EP $\geq 2$ wks             | There was good evidence that estrogen or combined estrogen and progestin therapy does not protect against a decline in overall cognitive functioning of older          |

|                    |                                |       |   |                                   |                                |                                                                                                                                            |
|--------------------|--------------------------------|-------|---|-----------------------------------|--------------------------------|--------------------------------------------------------------------------------------------------------------------------------------------|
|                    |                                |       |   |                                   |                                | postmenopausal women with normal intellectual ability                                                                                      |
| Cognitive function | Marjoribanks 2017 <sup>3</sup> | DBRCT | 5 | PPM without major health problems | E/EP $\geq$ 12 mo <sup>d</sup> | MHT was not indicated for prevention of deterioration of cognitive function in postmenopausal women                                        |
| Cognitive function | Hogervorst 2009 <sup>31</sup>  | DBRCT | 7 | PM with dementia                  | E/EP $\geq$ 2 wks              | Estrogen or estrogen combined with progestin for cognitive improvement or maintenance was not indicated for women with Alzheimer's disease |

Abbreviations: CC, case-control study; CI, confidence interval; CO, cohort study; CS, cross-sectional study; DBRCT, double-blinded randomized controlled trial; E, estrogen alone; EP, estrogen plus progestin; HDL, high-density lipoprotein; IGF, insulin-like growth factor; IL, interleukin; LDL, low-density lipoprotein; MD, mean difference; MHT, menopausal hormone therapy; PM, postmenopausal women; PPM, peri-/post-menopausal women; RCT, randomized controlled trial; RR, risk ratio.

<sup>a</sup> Incidence unless otherwise indicated.

<sup>b</sup> "Any MHT": any type of menopausal hormone therapy, such as estrogen alone, estrogen plus progestin, tibolone, selective estrogen receptor modulators, or unspecified; the comparator group is placebo or no treatment, unless otherwise indicated.

<sup>c</sup> Conjugated equine estrogen, oral esterified estrogen or transdermal estrogen, alone or in combination with progestin for at least 2 months.

<sup>d</sup> Estrogen with/without progestin (oral/transdermal/subcutaneous/intranasal) for at least 12 months.

## A Data Extraction for Binary Outcomes

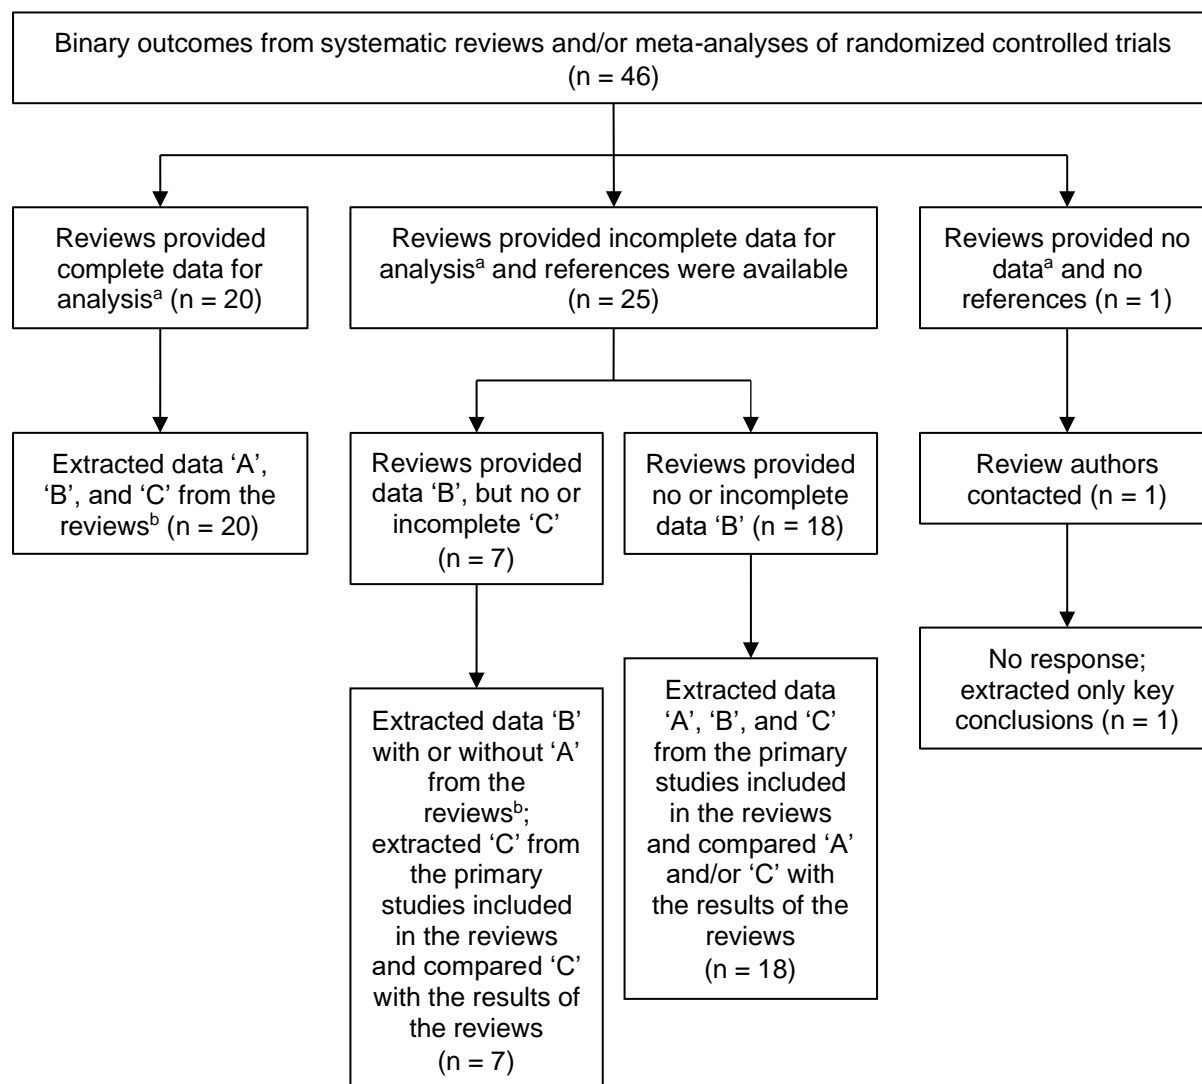

n, number of outcomes. The same outcome was counted more than once if investigated in different systematic reviews and/or meta-analyses with different population/intervention characteristics.

<sup>a</sup> 'Data for analysis' include study-specific effect estimates with 95% confidence intervals (denoted as 'A'), number of events and participants in intervention and control groups (as 'B'), and trial characteristics (as 'C').

<sup>b</sup> Data 'A', 'B', or 'C' were revised when we happened to find any errors in them.

**Fig A. Pre-specified Protocol for Extracting Data from Included Systematic Reviews and/or Meta-Analyses of Randomized Controlled Trials on Menopausal Hormone Therapy and Multiple Outcomes**

## B Data Extraction for Continuous Outcomes

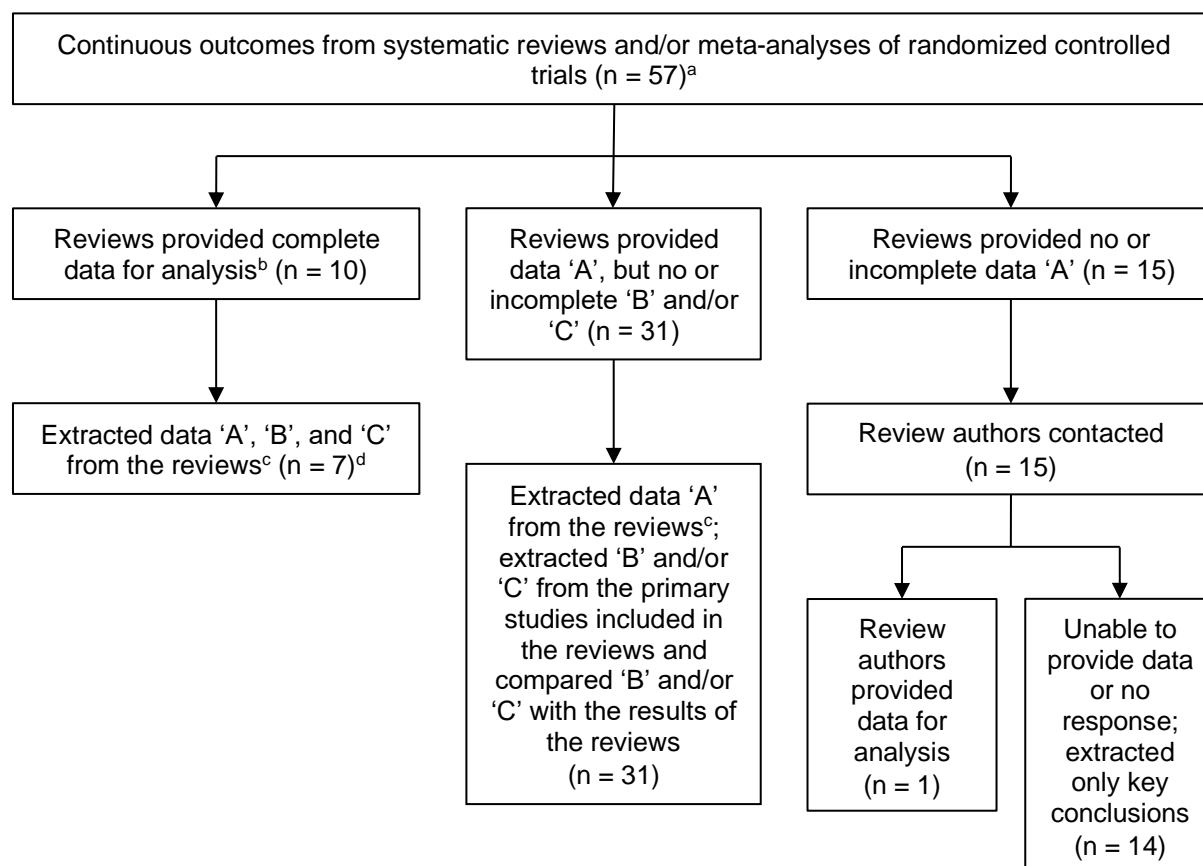

n, number of outcomes. The same outcome was counted more than once if investigated in different systematic reviews and/or meta-analyses with different population/intervention characteristics.

<sup>a</sup> For systematic reviews without meta-analysis (n = 1), only key findings or conclusions on each outcome were extracted from the reviews.

<sup>b</sup> 'Data for analysis' include study-specific effect estimates with 95% confidence intervals (denoted as 'A'), number of participants in intervention and control groups (as 'B'), and trial characteristics (as 'C').

<sup>c</sup> Data 'A', 'B', or 'C' were revised when we happened to find any errors in them.

<sup>d</sup> For outcome 'cognitive function', only key conclusions were extracted from the reviews (n = 3).

**Fig A. Continued**

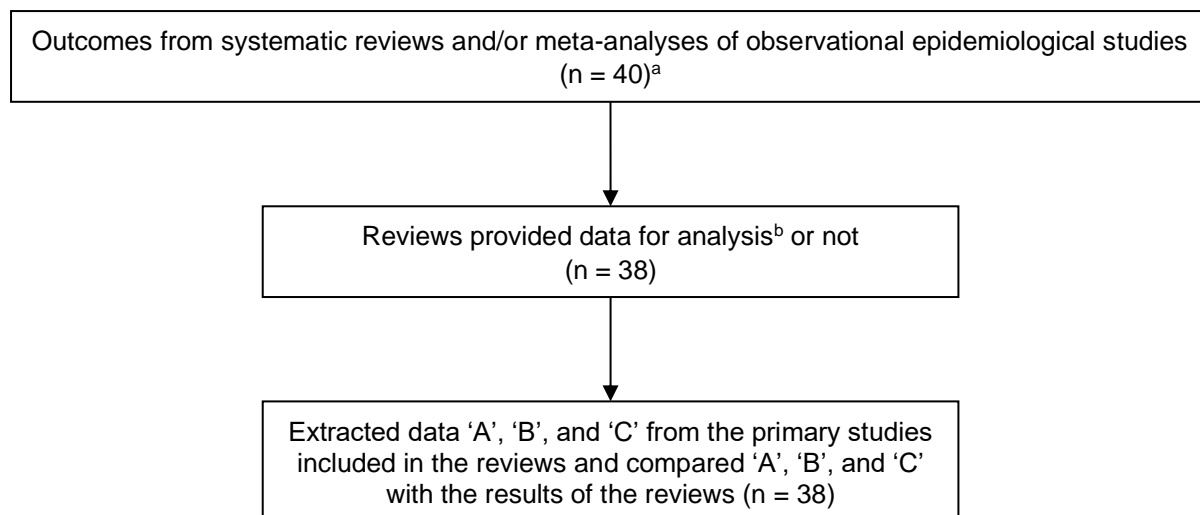

n, number of outcomes.

<sup>a</sup> For systematic reviews without meta-analysis (n = 2), only key findings or conclusions on each outcome were extracted from the reviews.

<sup>b</sup> 'Data for analysis' include study-specific effect estimates with 95% confidence intervals (denoted as 'A'), number of cases and controls for case-control studies, or number of cases and population for cohort studies (as 'B'), and study characteristics (as 'C').

**Fig B. Pre-specified Protocol for Extracting Data from Included Systematic Reviews and/or Meta-Analyses of Observational Epidemiological Studies on Menopausal Hormone Therapy and Multiple Outcomes**

| Outcome                                                                                          | No. of Trials | No. of Participants        |         | Unit                    | Mean Difference (95% CI) | Tau   | 95% Prediction Interval |
|--------------------------------------------------------------------------------------------------|---------------|----------------------------|---------|-------------------------|--------------------------|-------|-------------------------|
|                                                                                                  |               | Menopausal Hormone Therapy | Control |                         |                          |       |                         |
| <b>Symptoms, signs or clinical findings of blood, blood-forming organs, or the immune system</b> |               |                            |         |                         |                          |       |                         |
| C-reactive protein                                                                               | 12            | 1,444                      | 627     | % change                | 42.28 (18.14, 66.41)     | 20.99 | -1.98 to 77.31          |
| PAI-1 antigen                                                                                    | 13            | 1,323                      | 655     | % change                | -32.19 (-44.38, -20.01)  | 6.52  | -51.53 to -20.47        |
| Fibrinogen                                                                                       | 20            | 2,303                      | 905     | % change                | -5.43 (-7.36, -3.49)     | 0     | NA                      |
| E-selectin                                                                                       | 7             | 985                        | 352     | % change                | -17.63 (-26.74, -8.51)   | 0     | NA                      |
| Protein S                                                                                        | NA            | NA                         | NA      | % change                | -8.60 (-13.10, -4.10)    | NA    | NA                      |
| <b>Symptoms, signs or clinical findings of endocrine, nutritional or metabolic diseases</b>      |               |                            |         |                         |                          |       |                         |
| BMD of lumbar spine                                                                              | 21            | NA                         | NA      | % change                | 6.76 (5.63, 7.89)        | NA    | NA                      |
| BMD of forearm                                                                                   | 14            | NA                         | NA      | % change                | 4.53 (3.68, 5.36)        | NA    | NA                      |
| BMD of femoral neck                                                                              | 9             | NA                         | NA      | % change                | 4.12 (3.45, 4.80)        | NA    | NA                      |
| BMD of proximal femur (EPT)                                                                      | 2             | 13                         | 23      | g/cm <sup>2</sup> /year | 2.24 (0.60, 3.89)        | 0     | NA                      |
| Insulin resistance <sup>a</sup>                                                                  | 18            | 2,430                      | 1,207   | % change                | -14.17 (-21.94, -6.40)   | 1.87  | -20.15 to -11.12        |
| Insulin resistance <sup>b</sup>                                                                  | NA            | NA                         | NA      | % change                | -35.80 (-51.70, -19.80)  | NA    | NA                      |
| Hemoglobin A1c (EPT) <sup>b</sup>                                                                | 4             | 84                         | 78      | %                       | -0.47 (-0.72, -0.23)     | 0     | NA                      |
| Fasting glucose <sup>a</sup>                                                                     | NA            | NA                         | NA      | % change                | -2.50 (-3.50, -1.50)     | NA    | NA                      |
| Fasting glucose <sup>b</sup>                                                                     | NA            | NA                         | NA      | % change                | -11.50 (-18.00, -5.10)   | NA    | NA                      |
| Fasting insulin <sup>a</sup>                                                                     | NA            | NA                         | NA      | % change                | -9.30 (-13.70, -4.90)    | NA    | NA                      |
| Fasting insulin <sup>b</sup>                                                                     | NA            | NA                         | NA      | % change                | -20.20 (-36.30, -4.20)   | NA    | NA                      |
| Total cholesterol <sup>c</sup>                                                                   | 11            | 599                        | 565     | mg/dL                   | -13.20 (-19.69, -6.72)   | 5.99  | -25.38 to 3.38          |
| Total cholesterol (EPT) <sup>b</sup>                                                             | 5             | 125                        | 132     | mmol/L                  | -0.39 (-0.78, -0.01)     | 0.09  | NA                      |
| HDL cholesterol                                                                                  | NA            | NA                         | NA      | % change                | 5.10 (3.60, 6.70)        | NA    | NA                      |
| LDL cholesterol <sup>a</sup>                                                                     | NA            | NA                         | NA      | % change                | -11.00 (-12.30, -9.60)   | NA    | NA                      |
| LDL cholesterol <sup>c</sup>                                                                     | 11            | 600                        | 566     | mg/dL                   | -13.16 (-18.66, -7.67)   | 2.88  | -19.93 to -6.05         |
| LDL cholesterol (EPT) <sup>b</sup>                                                               | 5             | 124                        | 128     | mmol/L                  | -0.22 (-0.42, -0.01)     | 0     | NA                      |
| LDL/HDL ratio                                                                                    | 55            | 6,362                      | 4,377   | % change                | -16.25 (-18.83, -13.68)  | 5.57  | -30.46 to -4.67         |
| Lipoprotein (a)                                                                                  | 39            | 1,989                      | 1,970   | % change                | -21.20 (-28.78, -13.62)  | 18.23 | -77.87 to 2.47          |
| Triglyceride                                                                                     | 52            | 6,008                      | 4,214   | % change                | 2.39 (-0.69, 5.48)       | 4.87  | -12.67 to 10.94         |
| Waist circumference (EPT)                                                                        | 2             | 3,067                      | 2,870   | % change                | -0.70 (-0.74, -0.66)     | 0     | NA                      |
| Lean body mass                                                                                   | NA            | NA                         | NA      | % change                | 3.30 (0.02, 6.60)        | NA    | NA                      |
| <b>Symptoms, signs or clinical findings of the circulatory system</b>                            |               |                            |         |                         |                          |       |                         |
| Mean blood pressure                                                                              | NA            | NA                         | NA      | % change                | -1.70 (-2.90, -0.50)     | NA    | NA                      |

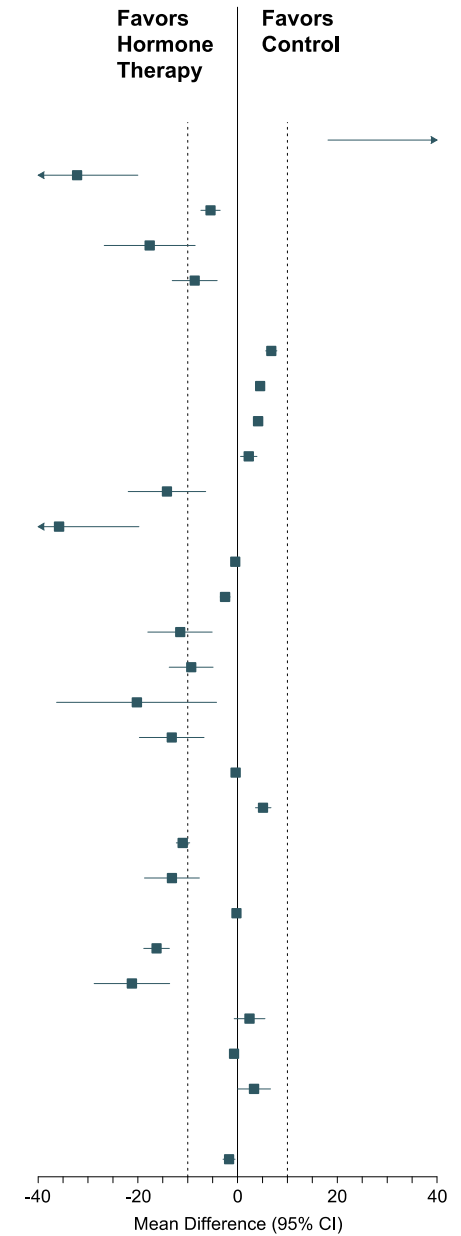



The average effects of any menopausal hormone therapy (estrogen-alone therapy or estrogen plus progestin therapy) in perimenopausal or postmenopausal women, unless otherwise stated. All estimates were from our own analysis apart from protein S, BMD of lumbar spine, BMD of forearm, BMD of femoral neck, insulin resistance in women with diabetes, fasting glucose, fasting insulin, HDL cholesterol, LDL cholesterol in women without diabetes, lean body mass and mean blood pressure. The center of each square represents the summary average effect for each outcome, and the horizontal lines represent the corresponding 95% confidence intervals. Abbreviations: BMD, bone mineral density; CI, confidence interval; EPT, estrogen plus progestin therapy; ET, estrogen-alone therapy; HDL, high-density lipoprotein; LDL, low-density lipoprotein; NA, not available or not applicable; PAI-1, plasminogen activator inhibitor-1.

<sup>a</sup> In women without diabetes.

<sup>b</sup> In women with diabetes.

<sup>c</sup> Low-dose menopausal hormone therapy.

### **Fig C. Consistent or Highly Suggestive Evidence from Meta-Analyses of Randomized Controlled Trials on Menopausal Hormone Therapy and Multiple Surrogate Outcomes**

| Outcome                                                                   | No. of Trials | No. of Events/Total No.    |            | Risk Ratio (95% CI) | Tau  | Most Precise <sup>a</sup> |
|---------------------------------------------------------------------------|---------------|----------------------------|------------|---------------------|------|---------------------------|
|                                                                           |               | Menopausal Hormone Therapy | Control    |                     |      |                           |
| <b>Neoplasms</b>                                                          |               |                            |            |                     |      |                           |
| Breast cancer (ET)                                                        | 7             | 247/6,537                  | 302/6,472  | 0.83 (0.43, 1.61)   | 0    | 0.82 (0.70, 0.97)         |
| Breast cancer (EPT)                                                       | 7             | 651/13,548                 | 502/12,580 | 1.24 (0.97, 1.57)   | 0    | 1.24 (1.10, 1.40)         |
| Endometrial cancer (EPT)                                                  | 6             | 76/11,159                  | 106/10,026 | 0.65 (0.19, 2.26)   | 0    | 0.67 (0.50, 0.92)         |
| <b>Diseases of the circulatory system</b>                                 |               |                            |            |                     |      |                           |
| Pulmonary embolism (EPT)                                                  | 3             | 193/12,082                 | 134/11,674 | 2.02 (0.22, 18.91)  | 0.54 | 1.28 (1.02, 1.61)         |
| <b>Mental or behavioural disorders</b>                                    |               |                            |            |                     |      |                           |
| Dementia (EPT)                                                            | 1             | 40/2,229                   | 21/2,303   | NA                  | NA   | 1.97 (1.16, 3.33)         |
| <b>Diseases of the genitourinary system</b>                               |               |                            |            |                     |      |                           |
| Irregular vaginal bleeding (ET)                                           | 3             | 113/311                    | 24/99      | 1.34 (0.07, 24.94)  | 0.32 | 1.73 (1.10, 2.71)         |
| Recurrent urinary tract infection (ET) <sup>b</sup>                       | 3             | 54/139                     | 89/134     | 0.58 (0.11, 2.99)   | 0.51 | 0.64 (0.47, 0.86)         |
| <b>Injury, poisoning or certain other consequences of external causes</b> |               |                            |            |                     |      |                           |
| Hip fracture (EPT)                                                        | 4             | 249/12,152                 | 287/11,746 | 0.83 (0.45, 1.54)   | 0    | 0.82 (0.69, 0.97)         |
| <b>Functioning assessment</b>                                             |               |                            |            |                     |      |                           |
| Sleep quality (EPT) <sup>c</sup>                                          | 3             | NA/7,660                   | NA/7,328   | 0.86 (0.21, 3.50)   | 0.13 | 0.92 (0.89, 0.95)         |
| Skeletal muscle strength (EPT) <sup>c</sup>                               | 4             | NA/104                     | NA/110     | 0.57 (0.28, 1.15)   | 0.36 | 0.65 (0.46, 0.93)         |

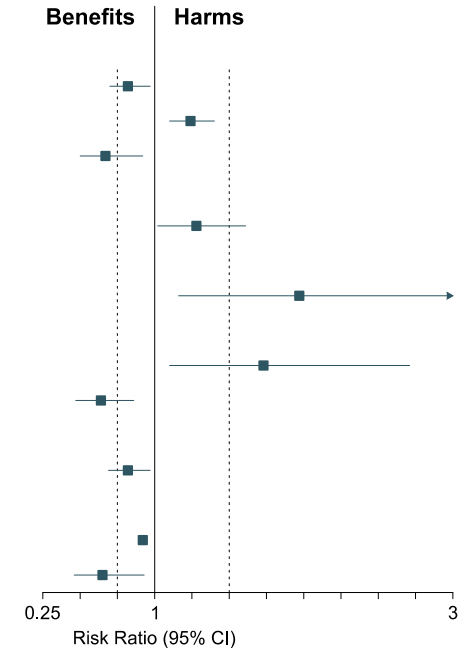

The effects of estrogen-alone therapy or estrogen plus progestin therapy in perimenopausal or postmenopausal women, unless otherwise stated. All estimates were from our own analysis. The center of each square represents the summary average effect for each outcome, and the horizontal lines represent the corresponding 95% confidence intervals. Abbreviations: CI, confidence interval; EPT, estrogen plus progestin therapy; ET, estrogen-alone therapy; NA, not available or not applicable.

<sup>a</sup> Risk ratio with 95% confidence interval of the study with the smallest standard error in each meta-analysis.

<sup>b</sup> In women who already have the outcomes of interest.

<sup>c</sup> The effect measures for continuous outcomes were converted into risk ratio scale for comparison. The results on its original scale can be found in [Table H](#).

## Fig D. Suggestive Evidence from Meta-Analyses of Randomized Controlled Trials on Menopausal Hormone Therapy and Incidence of Diseases and Other Health Outcomes

| Outcome                                             | No. of Studies (Cc/Co) | No. of Cases /Population | Risk Ratio (95% CI) | Tau  | Most Precise <sup>a</sup> |
|-----------------------------------------------------|------------------------|--------------------------|---------------------|------|---------------------------|
| <b>Neoplasms</b>                                    |                        |                          |                     |      |                           |
| Breast cancer recurrence                            | 2 (0/2)                | 408/1,991                | 0.69 (0.29, 1.61)   | 0    | 0.72 (0.57, 0.91)         |
| Lung cancer overall survival <sup>b</sup>           | 3 (0/3)                | NA/1,972                 | 1.06 (0.45, 2.51)   | 0.29 | 0.77 (0.65, 0.92)         |
| Cutaneous melanoma (ET)                             | 3 (3/0)                | 995/5,473                | 1.78 (0.74, 4.28)   | 0.15 | 2.08 (1.38, 3.14)         |
| Endometrial cancer (EPT) <sup>c</sup>               | 8 (1/7)                | 9,103/1,735,287          | 1.30 (0.93, 1.82)   | 0.35 | 1.71 (1.57, 1.86)         |
| <b>Diseases of the immune system</b>                |                        |                          |                     |      |                           |
| Systemic lupus erythematosus                        | 3 (2/1)                | 204/71,061               | 1.62 (0.67, 3.91)   | 0    | 1.90 (1.16, 3.10)         |
| <b>Diseases of the nervous system</b>               |                        |                          |                     |      |                           |
| Parkinson's disease                                 | 8 (5/3)                | 1,839/270,396            | 1.04 (0.79, 1.36)   | 0.21 | 1.24 (1.00, 1.53)         |
| <b>Endocrine, nutritional or metabolic diseases</b> |                        |                          |                     |      |                           |
| Diabetes mellitus                                   | 2 (0/2)                | 265/9,308                | 0.81 (0.02, 28.81)  | 0.34 | 0.63 (0.46, 0.87)         |
| <b>Diseases of the circulatory system</b>           |                        |                          |                     |      |                           |
| Coronary heart disease mortality                    | 3 (0/3)                | 512/49,929               | 0.67 (0.25, 1.81)   | 0.28 | 0.67 (0.53, 0.85)         |
| <b>Others, not elsewhere classified</b>             |                        |                          |                     |      |                           |
| Cardiovascular disease incidence <sup>c</sup>       | 2 (0/2)                | 3,114/77,850             | 0.90 (0.11, 7.22)   | 0.22 | 0.77 (0.68, 0.87)         |
| Cardiovascular disease mortality                    | 4 (0/4)                | 604/16,896               | 0.65 (0.40, 1.06)   | 0.19 | 0.66 (0.48, 0.90)         |

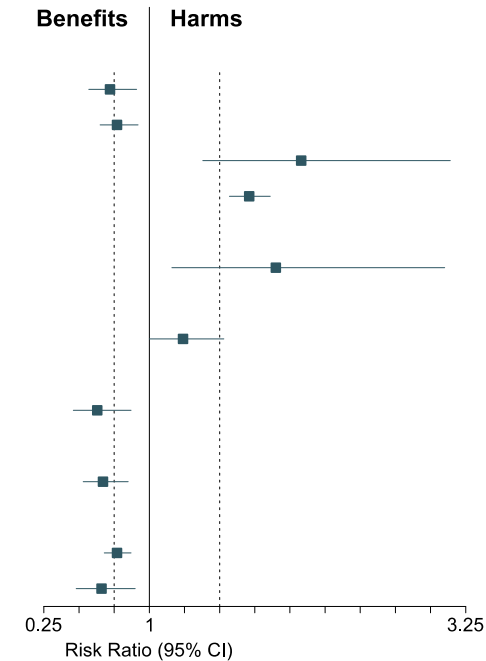

The average effects of any menopausal hormone therapy (estrogen-alone therapy or estrogen plus progestin therapy) in perimenopausal or postmenopausal women, unless otherwise stated. The estimates were for ever use of menopausal hormone therapy, unless otherwise stated. All estimates were from our own analysis. The center of each square represents the summary average effect for each outcome, and the horizontal lines represent the corresponding 95% confidence intervals. Abbreviations: Cc, case-control study; CI, confidence interval; Co, cohort study; EPT, estrogen plus progestin therapy; ET, estrogen-alone therapy; NA, not available.

<sup>a</sup> Risk ratio with 95% confidence interval of the study with the smallest standard error in each meta-analysis.

<sup>b</sup> Use of menopausal hormone therapy before diagnosis of cancer.

<sup>c</sup> Current use of menopausal hormone therapy.

**Fig E. Suggestive Evidence from Meta-Analyses of Observational Epidemiological Studies on Menopausal Hormone Therapy and Incidence of Diseases and Other Health Outcomes**

## References

1. Zhu L, Jiang X, Sun Y, Shu W. Effect of hormone therapy on the risk of bone fractures: a systematic review and meta-analysis of randomized controlled trials. *Menopause* 2016;23(4):461-70.
2. Manson JE, Chlebowski RT, Stefanick ML, et al. Menopausal hormone therapy and health outcomes during the intervention and extended poststopping phases of the Women's Health Initiative randomized trials. *JAMA* 2013;310(13):1353-68.
3. Marjoribanks J, Farquhar C, Roberts H, Lethaby A, Lee J. Long-term hormone therapy for perimenopausal and postmenopausal women. *Cochrane Database Syst Rev* 2017;1(1):CD004143.
4. Benkhadra K, Mohammed K, Al Nofal A, et al. Menopausal Hormone Therapy and Mortality: A Systematic Review and Meta-Analysis. *J Clin Endocrinol Metab* 2015;100(11):4021-8.
5. Col NF, Kim JA, Chlebowski RT. Menopausal hormone therapy after breast cancer: a meta-analysis and critical appraisal of the evidence. *Breast Cancer Res* 2005;7(4):R535-40.
6. Li D, Ding CY, Qiu LH. Postoperative hormone replacement therapy for epithelial ovarian cancer patients: a systematic review and meta-analysis. *Gynecol Oncol* 2015;139(2):355-62.
7. Salpeter SR, Walsh JM, Ormiston TM, Greyber E, Buckley NS, Salpeter EE. Meta-analysis: effect of hormone-replacement therapy on components of the metabolic syndrome in postmenopausal women. *Diabetes Obes Metab* 2006;8(5):538-54.
8. Casanova G, Bossardi Ramos R, Ziegelmann P, Spritzer PM. Effects of low-dose versus placebo or conventional-dose postmenopausal hormone therapy on variables related to cardiovascular risk: a systematic review and meta-analyses of randomized clinical trials. *J Clin Endocrinol Metab* 2015;100(3):1028-37.
9. Abdi F, Mobedi H, Mosaffa N, Dolatian M, Ramezani Tehrani F. Effects of hormone replacement therapy on immunological factors in the postmenopausal period. *Climacteric* 2016;19(3):234-9.
10. Xu Y, Lin J, Wang S, Xiong J, Zhu Q. Combined estrogen replacement therapy on metabolic control in postmenopausal women with diabetes mellitus. *Kaohsiung J Med Sci* 2014;30(7):350-61.
11. Ramesh S, Mann MC, Holroyd-Leduc JM, et al. Hormone therapy and clinical and surrogate cardiovascular endpoints in women with chronic kidney disease: a systematic review and meta-analysis. *Menopause* 2016;23(9):1028-37.
12. Anagnostis P, Galanis P, Chatzistergiou V, et al. The effect of hormone replacement therapy and tibolone on lipoprotein (a) concentrations in postmenopausal women: A systematic review and meta-analysis. *Maturitas* 2017;99:27-36.
13. Kongnyuy EJ, Norman RJ, Flight IHK, Rees MC. Oestrogen and progestogen hormone replacement therapy for peri-menopausal and post-menopausal women: weight and body fat distribution. *Cochrane Database Syst Rev* 1999;1999(3):CD001018.
14. Wells G, Tugwell P, Shea B, et al. Meta-analyses of therapies for postmenopausal osteoporosis. V. Meta-analysis of the efficacy of hormone replacement therapy in treating and preventing osteoporosis in postmenopausal women. *Endocr Rev* 2002;23(4):529-39.
15. Rudic JS, Poropat G, Krstic MN, Bjelakovic G, Gluud C. Hormone replacement for osteoporosis in women with primary biliary cirrhosis. *Cochrane Database Syst Rev* 2011;2011(12):CD009146.
16. Whedon JM, KizhakkeVeetil A, Rugo NA, Kieffer KA. Bioidentical Estrogen for Menopausal Depressive Symptoms: A Systematic Review and Meta-Analysis. *J Womens Health* 2017;26(1):18-28.
17. Sare GM, Gray LJ, Bath PM. Association between hormone replacement therapy and subsequent arterial and venous vascular events: a meta-analysis. *Eur Heart J* 2008;29(16):2031-41.
18. Yang D, Li J, Yuan Z, Liu X. Effect of hormone replacement therapy on cardiovascular outcomes: a meta-analysis of randomized controlled trials. *PLoS One* 2013;8(5):e62329.
19. O'Brien J, Jackson JW, Grodstein F, Blacker D, Weuve J. Postmenopausal hormone therapy is not associated with risk of all-cause dementia and Alzheimer's disease. *Epidemiol Rev* 2014;36(1):83-103.
20. Boardman HM, Hartley L, Eisinga A, et al. Hormone therapy for preventing cardiovascular disease in post-menopausal women. *Cochrane Database Syst Rev* 2015;2015(3):CD002229.
21. Canonico M, Plu-Bureau G, Lowe GD, Scarabin PY. Hormone replacement therapy and risk of venous thromboembolism in postmenopausal women: systematic review and meta-analysis. *BMJ* 2008;336(7655):1227-31.
22. Perrotta C, Aznar M, Mejia R, Albert X, Ng CW. Oestrogens for preventing recurrent urinary tract infection in postmenopausal women. *Cochrane Database Syst Rev* 2008;2008(2):CD005131.
23. Furness S, Roberts H, Marjoribanks J, Lethaby A. Hormone therapy in postmenopausal women and risk of endometrial hyperplasia. *Cochrane Database Syst Rev* 2012;2012(8):CD000402.
24. Lethaby A, Ayeleke RO, Roberts H. Local oestrogen for vaginal atrophy in postmenopausal women. *Cochrane Database Syst Rev* 2016;2016(8):CD001500.

25. Lethaby AE, Farquhar C, Sarkis A, Roberts H, Jepson R, Barlow D. The association of oestrogen, oestrogen-progestogen and placebo with endometrial hyperplasia and irregular bleeding in the menopause. *Cochrane Database Syst Rev* 1999;1999(2):CD000402.
26. Maclennan AH, Broadbent JL, Lester S, Moore V. Oral oestrogen and combined oestrogen/progestogen therapy versus placebo for hot flushes. *Cochrane Database Syst Rev* 2004;2004(4):CD002978.
27. Cody JD, Jacobs ML, Richardson K, Moehrer B, Hextall A. Oestrogen therapy for urinary incontinence in post-menopausal women. *Cochrane Database Syst Rev* 2012;10(10):CD001405.
28. Torgerson DJ, Bell-Syer SE. Hormone replacement therapy and prevention of vertebral fractures: a meta-analysis of randomised trials. *BMC Musculoskelet Disord* 2001;2:7.
29. Torgerson DJ, Bell-Syer SE. Hormone replacement therapy and prevention of nonvertebral fractures: a meta-analysis of randomized trials. *JAMA* 2001;285(22):2891-7.
30. Lethaby A, Hogervorst E, Richards M, Yesufu A, Yaffe K. Hormone replacement therapy for cognitive function in postmenopausal women. *Cochrane Database Syst Rev* 2008;2008(1):CD003122.
31. Hogervorst E, Yaffe K, Richards M, Huppert FA. Hormone replacement therapy to maintain cognitive function in women with dementia. *Cochrane Database Syst Rev* 2009;2009(1):CD003799.
32. Cintron D, Lipford M, Larrea-Mantilla L, et al. Efficacy of menopausal hormone therapy on sleep quality: systematic review and meta-analysis. *Endocrine* 2017;55(3):702-11.
33. Nastri CO, Lara LA, Ferriani RA, Rosa ESAC, Figueiredo JB, Martins WP. Hormone therapy for sexual function in perimenopausal and postmenopausal women. *Cochrane Database Syst Rev* 2013;2013(6):CD009672.
34. Greising SM, Baltgalvis KA, Lowe DA, Warren GL. Hormone therapy and skeletal muscle strength: a meta-analysis. *J Gerontol A Biol Sci Med Sci* 2009;64(10):1071-81.
35. Salpeter SR, Walsh JM, Greyber E, Ormiston TM, Salpeter EE. Mortality associated with hormone replacement therapy in younger and older women: a meta-analysis. *J Gen Intern Med* 2004;19(7):791-804.
36. Gandini S, Iodice S, Koomen E, Di Pietro A, Sera F, Caini S. Hormonal and reproductive factors in relation to melanoma in women: current review and meta-analysis. *Eur J Cancer* 2011;47(17):2607-17.
37. McCarthy CE, Field JK, Marcus MW. Age at menopause and hormone replacement therapy as risk factors for head and neck and oesophageal cancer (Review). *Oncol Rep* 2017;38(4):1915-22.
38. Qi ZY, Shao C, Zhang X, Hui GZ, Wang Z. Exogenous and endogenous hormones in relation to glioma in women: a meta-analysis of 11 case-control studies. *PLoS One* 2013;8(7):e68695.
39. Benson VS, Kirichek O, Beral V, Green J. Menopausal hormone therapy and central nervous system tumor risk: large UK prospective study and meta-analysis. *Int J Cancer* 2015;136(10):2369-77.
40. Qi ZY, Shao C, Huang YL, Hui GZ, Zhou YX, Wang Z. Reproductive and exogenous hormone factors in relation to risk of meningioma in women: a meta-analysis. *PLoS One* 2013;8(12):e83261.
41. Cao Y, Wang Z, Gu J, et al. Reproductive Factors but Not Hormonal Factors Associated with Thyroid Cancer Risk: A Systematic Review and Meta-Analysis. *Biomed Res Int* 2015;2015:103515.
42. Zhu Y, Yue D, Yuan B, Zhu L, Lu M. Reproductive factors are associated with oesophageal cancer risk: results from a meta-analysis of observational studies. *Eur J Cancer Prev* 2017;26(1):1-9.
43. Camargo MC, Goto Y, Zabaleta J, Morgan DR, Correa P, Rabkin CS. Sex hormones, hormonal interventions, and gastric cancer risk: a meta-analysis. *Cancer Epidemiol Biomarkers Prev* 2012;21(1):20-38.
44. Green J, Czanner G, Reeves G, et al. Menopausal hormone therapy and risk of gastrointestinal cancer: nested case-control study within a prospective cohort, and meta-analysis. *Int J Cancer* 2012;130(10):2387-96.
45. Tang B, Lv J, Li Y, Yuan S, Wang Z, He S. Relationship between female hormonal and menstrual factors and pancreatic cancer: a meta-analysis of observational studies. *Medicine* 2015;94(7):e177.
46. Zhong GC, Liu Y, Chen N, et al. Reproductive factors, menopausal hormone therapies and primary liver cancer risk: a systematic review and dose-response meta-analysis of observational studies. *Hum Reprod Update* 2016;23(1):126-38.
47. Yao Y, Gu X, Zhu J, Yuan D, Song Y. Hormone replacement therapy in females can decrease the risk of lung cancer: a meta-analysis. *PLoS One* 2013;8(8):e71236.
48. Bae JM, Kim EH. Hormonal Replacement Therapy and the Risk of Lung Cancer in Women: An Adaptive Meta-analysis of Cohort Studies. *J Prev Med Public Health* 2015;48(6):280-6.
49. Li W, Lin X, Wang R, Wang F, Xie S, Tse LA. Hormone therapy and lung cancer mortality in women: Systematic review and meta-analysis. *Steroids* 2017;118:47-54.
50. Anothaisintawee T, Wiratkapun C, Lerdstitthichai P, et al. Risk factors of breast cancer: a systematic review and meta-analysis. *Asia Pac J Public Health* 2013;25(5):368-87.
51. Wang K, Li F, Chen L, Lai YM, Zhang X, Li HY. Change in risk of breast cancer after receiving hormone replacement therapy by considering effect-modifiers: a systematic review and dose-response meta-analysis of prospective studies. *Oncotarget* 2017;8(46):81109-24.

52. Yu X, Zhou S, Wang J, et al. Hormone replacement therapy and breast cancer survival: a systematic review and meta-analysis of observational studies. *Breast Cancer* 2017;24(5):643-57.
53. Grady D, Gebretsadik T, Kerlikowske K, Ernster V, Petitti D. Hormone replacement therapy and endometrial cancer risk: a meta-analysis. *Obstet Gynecol* 1995;85(2):304-13.
54. Sjogren LL, Morch LS, Lokkegaard E. Hormone replacement therapy and the risk of endometrial cancer: A systematic review. *Maturitas* 2016;91:25-35.
55. Shim SH, Lee SJ, Kim SN. Effects of hormone replacement therapy on the rate of recurrence in endometrial cancer survivors: a meta-analysis. *Eur J Cancer* 2014;50(9):1628-37.
56. Greiser CM, Greiser EM, Doren M. Menopausal hormone therapy and risk of ovarian cancer: systematic review and meta-analysis. *Hum Reprod Update* 2007;13(5):453-63.
57. Zhou B, Sun Q, Cong R, et al. Hormone replacement therapy and ovarian cancer risk: a meta-analysis. *Gynecol Oncol* 2008;108(3):641-51.
58. Shi LF, Wu Y, Li CY. Hormone therapy and risk of ovarian cancer in postmenopausal women: a systematic review and meta-analysis. *Menopause* 2016;23(4):417-24.
59. Rojas-Villarraga A, Torres-Gonzalez JV, Ruiz-Sternberg AM. Safety of hormonal replacement therapy and oral contraceptives in systemic lupus erythematosus: a systematic review and meta-analysis. *PLoS One* 2014;9(8):e104303.
60. Wang P, Li J, Qiu S, Wen H, Du J. Hormone replacement therapy and Parkinson's disease risk in women: a meta-analysis of 14 observational studies. *Neuropsychiatr Dis Treat* 2015;11:59-66.
61. LeBlanc ES, Janowsky J, Chan BK, Nelson HD. Hormone replacement therapy and cognition: systematic review and meta-analysis. *JAMA* 2001;285(11):1489-99.
62. Hogervorst E, Williams J, Budge M, Riedel W, Jolles J. The nature of the effect of female gonadal hormone replacement therapy on cognitive function in post-menopausal women: a meta-analysis. *Neuroscience* 2000;101(3):485-512.
63. Lai K, Cui J, Ni S, Zhang Y, He J, Yao K. The effects of postmenopausal hormone use on cataract: a meta-analysis. *PLoS One* 2013;8(10):e78647.
64. Humphrey LL, Chan BK, Sox HC. Postmenopausal hormone replacement therapy and the primary prevention of cardiovascular disease. *Ann Intern Med* 2002;137(4):273-84.
65. McCleary N, Nwaru BI, Nurmatov UB, Critchley H, Sheikh A. Endogenous and exogenous sex steroid hormones in asthma and allergy in females: A systematic review and meta-analysis. *J Allergy Clin Immunol* 2018;141(4):1510-3.e8.
66. Wang S, Wang Y, Xu J, Chen Y. Is the oral contraceptive or hormone replacement therapy a risk factor for cholelithiasis: A systematic review and meta-analysis. *Medicine* 2017;96(14):e6556.
67. de Klerk BM, Schiphof D, Groeneveld FP, et al. Limited evidence for a protective effect of unopposed oestrogen therapy for osteoarthritis of the hip: a systematic review. *Rheumatology* 2009;48(2):104-12.
68. Salpeter SR, Cheng J, Thabane L, Buckley NS, Salpeter EE. Bayesian meta-analysis of hormone therapy and mortality in younger postmenopausal women. *Am J Med* 2009;122(11):1016-22.e1.
