# Supplementary material for: Menopausal hormone therapy and women’s health: An umbrella review
Source: PubMed Central journal article supplement (PMC8366967; doi:10.1371/journal.pmed.1003731), 2021-08-02
Supplement: pmed.1003731.s003.pdf [file pmed.1003731.s003.pdf]

## Updated Database Search for Umbrella Review on Menopausal Hormone Therapy and Women's Health

Given that our literature search for the umbrella review ended on November 26, 2017, to ascertain the amount of studies published since the last search, we performed an updated search of MEDLINE, EMBASE, Cochrane Database of Systematic Reviews, Database of Abstracts of Reviews of Effects, ISI Web of Science, CINAHL, AMED, Global Health, PsycINFO and CAB International from November 27, 2017 to December 17, 2020 using the same search strategies as the initial search (Table A in S1 Text). No language restriction was applied. Two investigators independently screened the titles and/or abstracts and reviewed full-text articles for eligibility. Any discrepancies were resolved by discussion.

In total, we identified 1,455 records, scrutinized 68 full-text articles, and ultimately obtained 37 articles from updated search that we judged were relevant to the review (Fig A below). Of the 37 articles, 10 meta-analyses of randomized controlled trials (RCTs), six meta-analyses of observational studies, nine meta-analyses of both RCTs and observational studies, and 12 systematic reviews without meta-analyses of RCTs and/or observational studies. The studies were published between 2017 and 2020. Given the time required to extract data, appraise the quality of the studies, and integrate the evidence from the studies into the umbrella review (we estimated that this may take a minimum of 12 months, during which time we anticipate that additional reviews must have been published on the topic that may also need to be integrated into the umbrella review, thereby making the process an unending one), we decided not to include the studies from the updated searches into the umbrella review. Rather, we take the evidence from the updated searches as explorative and therefore summarize the characteristics of each systematic review in the Table A below, including a statement of how the evidence generated from each systematic review may likely impact the current umbrella review if integrated in the review. This evidence analyses will be taken into account in the future when the current umbrella review is updated.

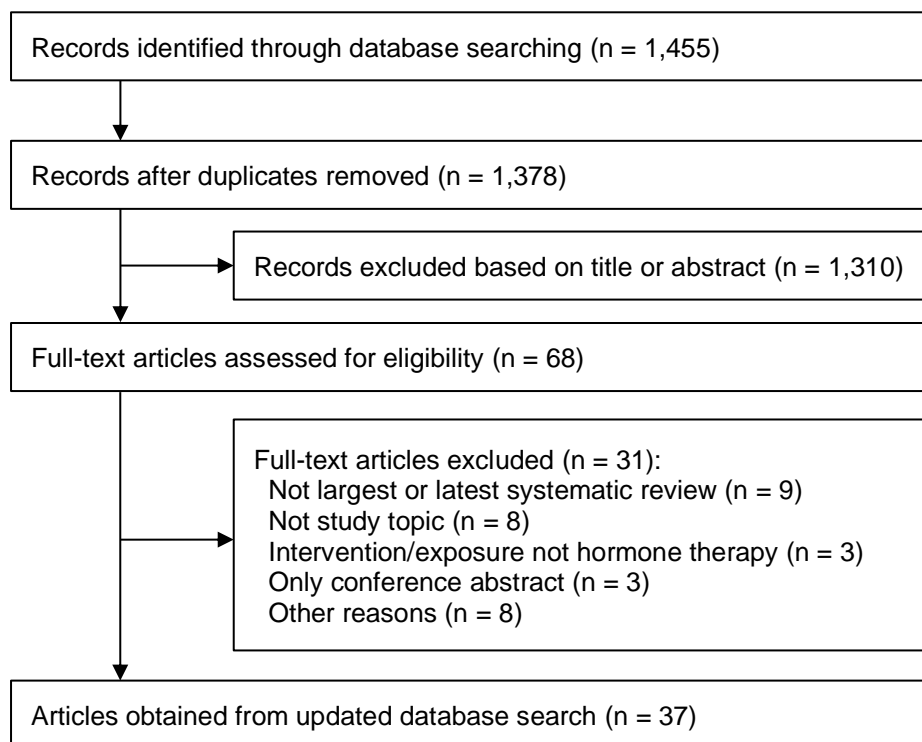

**Fig A. Flow Chart for Study Selection Process, Updated on December 17, 2020**

**Table A. Characteristics of Systematic Reviews and/or Meta-Analyses on Menopausal Hormone Therapy and Multiple Outcomes, Updated on December 17, 2020**

| Outcome <sup>a</sup>                                        | Reference                 | No. of Studies                            | Population                                          | Intervention /Exposure <sup>b</sup> | Conclusions and Comments                                                                                                                                                       | Feature of Studies <sup>c</sup> |
|-------------------------------------------------------------|---------------------------|-------------------------------------------|-----------------------------------------------------|-------------------------------------|--------------------------------------------------------------------------------------------------------------------------------------------------------------------------------|---------------------------------|
| <b>Meta-analyses of both RCTs and observational studies</b> |                           |                                           |                                                     |                                     |                                                                                                                                                                                |                                 |
| Dry eye disease                                             | Dang 2020 <sup>1</sup>    | 10 RCTs, 2 COs, 4 CSs                     | PM with dry eye disease                             | Any MHT                             | MHT showed a nonsignificant improvement in postoperative tear production and tear breakup time; not a critical outcome for clinical practice                                   |                                 |
| Urinary protein excretion                                   | Kattah 2018 <sup>2</sup>  | 3 RCTs, 1 case series, 4 COs, 1 CC, 3 CSs | PM                                                  | Any MHT                             | MHT was associated with a decreased risk of albuminuria; not a critical outcome for clinical practice                                                                          |                                 |
| Nephrolithiasis                                             | Yu 2017 <sup>3</sup>      | 2 RCTs, 1 CO, 1 CC                        | PM                                                  | Any MHT                             | There was no significant association between MHT and nephrolithiasis; not a critical outcome for clinical practice                                                             |                                 |
| Lung cancer                                                 | Yin 2020 <sup>4</sup>     | 38 studies (study design unspecified)     | PPM                                                 | Any MHT                             | Overall, MHT was not associated with lung cancer risk                                                                                                                          |                                 |
| Breast cancer                                               | Kim 2018 <sup>5</sup>     | 2 RCTs, 23 COs                            | PPM                                                 | Any MHT                             | Both ET and EPT were associated with an increased risk of breast cancer                                                                                                        |                                 |
| Breast cancer                                               | Yang 2017 <sup>6</sup>    | 5 RCTs, 6 COs, 3 CCs                      | PPM                                                 | Estradiol with/without progestin    | Estradiol combined with progestin was associated with an increased risk of breast cancer, while the effect estimate for estradiol alone did not reach statistical significance |                                 |
| Cardiovascular disease                                      | Kim 2020 <sup>7</sup>     | 26 RCTs, 30 COs, 17 CCs                   | PPM                                                 | Any MHT                             | MHT was associated with increased risks of venous thromboembolism, pulmonary embolism and stroke, but a decreased risk of myocardial infarction only in observational studies  |                                 |
| Dementia                                                    | Wu 2020 <sup>8</sup>      | 2 RCTs, 3 COs                             | PPM                                                 | Any MHT                             | MHT was associated with an increased risk of dementia                                                                                                                          |                                 |
| Breast cancer recurrence and survival                       | Mudhune 2019 <sup>9</sup> | 4 RCTs, 4 COs, 1 CC                       | Breast cancer survivors > 50 years old at diagnosis | Any MHT                             | In RCTs, MHT may increase the risk of recurrence, while in observational studies, MHT was associated with a decreased risk of recurrence and improved survival                 |                                 |

**Table A. Characteristics of Systematic Reviews and/or Meta-Analyses on Menopausal Hormone Therapy and Multiple Outcomes, Updated on December 17, 2020 (continued)**

| Outcome <sup>a</sup>                | Reference                      | No. of Studies | Population                                        | Intervention /Exposure <sup>b</sup>   | Conclusions and Comments                                                                                                                             | Feature of Studies <sup>c</sup> |
|-------------------------------------|--------------------------------|----------------|---------------------------------------------------|---------------------------------------|------------------------------------------------------------------------------------------------------------------------------------------------------|---------------------------------|
| <b>Meta-analyses of RCTs</b>        |                                |                |                                                   |                                       |                                                                                                                                                      |                                 |
| Left ventricular diastolic function | Chen 2020 <sup>10</sup>        | 8 RCTs         | PM                                                | ET/EPT                                | MHT may improve cardiac diastolic function; a surrogate outcome                                                                                      |                                 |
| Endometrial cancer recurrence       | Edey 2018 <sup>11</sup>        | 1 RCT          | Endometrial cancer survivors                      | Unspecified formulation               | There was insufficient high-quality evidence; included only one trial                                                                                |                                 |
| Bone mineral density                | Abdi 2017 <sup>12</sup>        | 9 RCTs         | PM                                                | Transdermal ET with/without progestin | Transdermal estrogen increased bone mineral density                                                                                                  |                                 |
| Hip fracture                        | Barrionuevo 2019 <sup>13</sup> | 7 RCTs         | PM                                                | ET/EPT                                | MHT showed a significant reduction in hip fracture                                                                                                   |                                 |
| Vertebral fracture                  | Barrionuevo 2019 <sup>13</sup> | 10 RCTs        | PM                                                | ET/EPT                                | MHT showed a significant reduction in vertebral fracture                                                                                             |                                 |
| Non-vertebral fracture              | Barrionuevo 2019 <sup>13</sup> | 15 RCTs        | PM                                                | ET/EPT                                | MHT showed a significant reduction in non-vertebral fracture                                                                                         |                                 |
| Ovarian cancer overall survival     | Saeaib 2020 <sup>14</sup>      | 3 RCTs         | Ovarian cancer survivors                          | ET/EPT                                | MHT may slightly improve overall survival, but the certainty of the evidence was low                                                                 |                                 |
| Sexual interest/arousal             | Javadivala 2019 <sup>15</sup>  | 18 RCTs        | PPM with low sexual interest                      | ET/EPT                                | MHT improved sexual interest/arousal                                                                                                                 |                                 |
| All-cause mortality                 | Nudy 2019 <sup>16</sup>        | 28 RCTs        | PPM                                               | Systemic ET/EPT                       | Overall, MHT was not associated with all-cause mortality                                                                                             |                                 |
| Cardiac death                       | Nudy 2019 <sup>16</sup>        | 17 RCTs        | PPM                                               | Systemic ET/EPT                       | Overall, MHT was not associated with cardiac death                                                                                                   |                                 |
| Coronary heart disease              | Nudy 2019 <sup>16</sup>        | 22 RCTs        | PPM                                               | Systemic ET/EPT                       | Overall, MHT was not associated with coronary heart disease                                                                                          |                                 |
| Recurrent urinary tract infection   | Chen 2020 <sup>17</sup>        | 8 RCTs         | PM with/without recurrent urinary tract infection | ET/EPT                                | Vaginal ET reduced recurrent urinary tract infection                                                                                                 |                                 |
| Lean body mass                      | Javed 2019 <sup>18</sup>       | 12 RCTs        | PM                                                | ET/EPT                                | MHT did not show a significant beneficial or detrimental effect on muscle mass; not a critical outcome for clinical practice                         |                                 |
| Cognitive function                  | Zhou 2020 <sup>19</sup>        | 2 RCTs         | PPM with Alzheimer's disease                      | ET/EPT                                | MHT may improve the Alzheimer's Disease Assessment Scale-cognitive subscale score; included only two small trials, and a fixed-effect model was used |                                 |

**Table A. Characteristics of Systematic Reviews and/or Meta-Analyses on Menopausal Hormone Therapy and Multiple Outcomes, Updated on December 17, 2020 (continued)**

| Outcome <sup>a</sup>                            | Reference                | No. of Studies                       | Population                          | Intervention /Exposure <sup>b</sup> | Conclusions and Comments                                                                                                       | Feature of Studies <sup>c</sup> |
|-------------------------------------------------|--------------------------|--------------------------------------|-------------------------------------|-------------------------------------|--------------------------------------------------------------------------------------------------------------------------------|---------------------------------|
| <b>Meta-analyses of observational studies</b>   |                          |                                      |                                     |                                     |                                                                                                                                |                                 |
| Colorectal cancer survival                      | Jang 2019 <sup>20</sup>  | 5 COs                                | Colorectal cancer survivors         | Any MHT                             | Current use of MHT was associated with improved colorectal cancer specific and overall survival                                |                                 |
| Kidney cancer                                   | Zhang 2020 <sup>21</sup> | 6 COs, 8 CCs                         | PPM                                 | Any MHT                             | Overall, MHT was not associated with kidney cancer risk                                                                        |                                 |
| Colorectal adenoma                              | Song 2019 <sup>22</sup>  | 8 studies (study design unspecified) | PPM                                 | Any MHT                             | MHT was associated with a decreased risk of colorectal adenoma                                                                 |                                 |
| Glioma                                          | Lan 2018 <sup>23</sup>   | 4 COs, 10 CCs                        | PPM                                 | Any MHT                             | MHT was associated with a decreased risk of glioma                                                                             |                                 |
| Ovarian cancer                                  | Liu 2019 <sup>24</sup>   | 15 COs, 19 CCs                       | PPM                                 | Any MHT                             | MHT was associated with an increased risk of ovarian cancer, especially for serous and endometrioid tumors                     |                                 |
| Melanoma                                        | Sun 2020 <sup>25</sup>   | 5 COs, 11 CCs                        | PPM                                 | Any MHT                             | MHT was associated with an increased risk of melanoma                                                                          |                                 |
| Alzheimer's disease                             | Wu 2020 <sup>8</sup>     | 6 COs, 9 CCs                         | PPM                                 | Any MHT                             | MHT was associated with an increased risk of Alzheimer's disease, especially for EPT users                                     |                                 |
| Parkinson's disease                             | Wu 2020 <sup>8</sup>     | 4 COs, 5 CCs                         | PPM                                 | Any MHT                             | EPT was associated with an increased risk of Parkinson's disease                                                               |                                 |
| <b>Systematic reviews without meta-analyses</b> |                          |                                      |                                     |                                     |                                                                                                                                |                                 |
| Mammographic density                            | Azam 2020 <sup>26</sup>  | 6 RCTs, 6 COs, 5 CCs, 5 CSs          | PPM                                 | Any MHT                             | MHT was positively associated with mammographic density with the highest increase among current users and continuous EPT users |                                 |
| Faecal incontinence                             | Bach 2020 <sup>27</sup>  | 1 RCT, 1 case series, 2 COs, 4 CSs   | PM with/without faecal incontinence | Any MHT                             | All studies had a high risk of bias and had conflicting views on the effects of MHT on faecal incontinence                     |                                 |
| Genitourinary syndrome of menopause             | Biehl 2019 <sup>28</sup> | 24 RCTs                              | PM with genitourinary symptoms      | Vaginal ET                          | Vaginal ET was effective for the treatment of genitourinary syndrome of menopause                                              |                                 |

**Table A. Characteristics of Systematic Reviews and/or Meta-Analyses on Menopausal Hormone Therapy and Multiple Outcomes, Updated on December 17, 2020 (continued)**

| <b>Outcome<sup>a</sup></b>                                  | <b>Reference</b>               | <b>No. of Studies</b>                                    | <b>Population</b>                      | <b>Intervention /Exposure<sup>b</sup></b> | <b>Conclusions and Comments</b>                                                                                                                        | <b>Feature of Studies<sup>c</sup></b> |
|-------------------------------------------------------------|--------------------------------|----------------------------------------------------------|----------------------------------------|-------------------------------------------|--------------------------------------------------------------------------------------------------------------------------------------------------------|---------------------------------------|
| Endometrial safety                                          | Constantine 2019 <sup>29</sup> | 20 RCTs, 8 case series, 4 COs, 6 CCs                     | PPM                                    | Vaginal ET                                | Current evidence did not support an increased risk of endometrial hyperplasia or cancer with low-dose vaginal ET                                       |                                       |
| Endometrial cancer                                          | Tempfer 2020 <sup>30</sup>     | 2 RCTs, 15 COs, 10 CCs                                   | PPM                                    | ET/EPT                                    | Continuous EPT reduced the risk of endometrial cancer, whereas ET increased the risk                                                                   |                                       |
| Endometriosis recurrence                                    | Zanello 2019 <sup>31</sup>     | 2 RCTs, 2 COs                                            | PPM with a history of endometriosis    | Any MHT                                   | The impact of MHT use on endometriosis recurrence and malignant transformation remained unclear                                                        |                                       |
| Breast cancer recurrence                                    | Wang 2018 <sup>32</sup>        | 1 RCT, 3 COs                                             | Breast cancer survivors < 50 years old | Any MHT                                   | In RCTs, MHT may increase the risk of recurrence, while in observational studies, no significant association was found                                 |                                       |
| Cervical cancer incidence and survival                      | Vargiu 2020 <sup>33</sup>      | 2 RCTs, 5 COs, 3 CCs                                     | Women with/without cervical cancer     | Any MHT                                   | The relation between MHT and cervical cancer incidence was controversial, and no evidence reported a harmful effect of MHT on cervical cancer outcomes |                                       |
| Cardiovascular disease                                      | Bezwada 2017 <sup>34</sup>     | 3 COs, 3 CCs                                             | PPM                                    | Transdermal MHT                           | There was some evidence suggestive of a possible protective cardiovascular effect with transdermal estrogen therapy                                    |                                       |
| Heart failure                                               | Bolijn 2017 <sup>35</sup>      | 1 CO, 1 RCT                                              | PPM                                    | Any MHT                                   | Conflicting results existed for MHT and heart failure                                                                                                  |                                       |
| Periodontal parameters and dental implants osseointegration | Chaves 2020 <sup>36</sup>      | 1 RCT, 6 CSs, 8 other studies (unspecified study design) | PM                                     | Any MHT                                   | There was no evidence to support MHT prescription for periodontal/implant placement purposes                                                           |                                       |
| Body weight                                                 | Coquoz 2019 <sup>37</sup>      | 8 RCTs, 2 COs                                            | PM                                     | Estrogen with micronized progesterone     | Estrogen combined with micronized progesterone did not change or reduce body weight                                                                    |                                       |
| Body mass index                                             | Coquoz 2019 <sup>37</sup>      | 6 RCTs, 1 CO                                             | PM                                     | Estrogen with micronized progesterone     | Estrogen combined with micronized progesterone had no impact on body mass index                                                                        |                                       |
| Glucose metabolism                                          | Coquoz 2019 <sup>37</sup>      | 7 RCTs, 4 COs                                            | PM                                     | Estrogen with micronized progesterone     | Estrogen combined with micronized progesterone had a neutral or beneficial effect on glucose metabolism                                                |                                       |

Abbreviations: CC, case-control study; CO, cohort study; CS, cross-sectional study; EPT, estrogen plus progestin therapy; ET, estrogen-alone therapy; MHT, menopausal hormone therapy; PM, postmenopausal women; PPM, peri-/post-menopausal women; RCT, randomized controlled trial.

<sup>a</sup> Incidence unless otherwise indicated.

<sup>b</sup> "Any MHT": any type of menopausal hormone therapy, such as estrogen alone, estrogen plus progestin, tibolone, selective estrogen receptor modulators, or unspecified; the comparator group is placebo or no treatment, unless otherwise indicated.

<sup>c</sup> The results of systematic reviews and/or meta-analyses were categorized into the following five categories:

|                                                                                   |                                                                    |
|-----------------------------------------------------------------------------------|--------------------------------------------------------------------|
|  | New outcome, not originally included in the umbrella review        |
|  | Reached similar conclusion(s) as the current umbrella review       |
|  | May likely adjust the evidence level in an updated umbrella review |
|  | Reached different conclusion(s) as the current umbrella review     |
|  | Systematic reviews without meta-analyses                           |

## References

1. Dang A, Nayeni M, Mather R, Malvankar-Mehta MS. Hormone replacement therapy for dry eye disease patients: systematic review and meta-analysis. *Can J Ophthalmol* 2020;55(1):3-11.
2. Kattah AG, Suarez MLG, Milic N, et al. Hormone therapy and urine protein excretion: a multiracial cohort study, systematic review, and meta-analysis. *Menopause* 2018;25(6):625-34.
3. Yu J, Yin BY. Postmenopausal Hormone and the Risk of Nephrolithiasis: A Meta-Analysis. *Excli J* 2017;16:986-94.
4. Yin X, Zhu Z, Hosgood HD, Lan Q, Seow WJ. Reproductive factors and lung cancer risk: a comprehensive systematic review and meta-analysis. *BMC Public Health* 2020;20(1):1458.
5. Kim S, Ko Y, Lee H, Lim J. Menopausal hormone therapy and the risk of breast cancer by histological type and race: a meta-analysis of randomized controlled trials and cohort studies. *Breast Cancer Res Treat* 2018;170(3):667-75.
6. Yang ZL, Hu Y, Zhang J, Xu LZ, Zeng RJ, Kang DY. Estradiol therapy and breast cancer risk in perimenopausal and postmenopausal women: a systematic review and meta-analysis. *Gynecol Endocrinol* 2017;33(2):87-92.
7. Kim JE, Chang JH, Jeong MJ, et al. A systematic review and meta-analysis of effects of menopausal hormone therapy on cardiovascular diseases. *Sci Rep* 2020;10(1):20631.
8. Wu M, Li M, Yuan J, et al. Postmenopausal hormone therapy and Alzheimer's disease, dementia, and Parkinson's disease: A systematic review and time-response meta-analysis. *Pharmacol Res* 2020;155:104693.
9. Mudhune GH, Armour M, McBride KA. Safety of menopausal hormone therapy in breast cancer survivors older than fifty at diagnosis: A systematic review and meta-analysis. *Breast* 2019;47:43-55.
10. Chen JS, Mou YP, Li CE, Li YN, Yu J. Effects of hormone replacement therapy on left ventricular diastolic function in postmenopausal women: a systematic review and meta-analysis. *Gynecol Endocrinol* 2021;37(4):300-6.
11. Edey KA, Rundle S, Hickey M. Hormone replacement therapy for women previously treated for endometrial cancer. *Cochrane Database Syst Rev* 2018;5(5):CD008830.
12. Abdi F, Mobedi H, Bayat F, Mosaffa N, Dolatian M, Tehranif FR. The Effects of Transdermal Estrogen Delivery on Bone Mineral Density in Postmenopausal Women: A Meta-analysis. *Iran J Pharm Res* 2017;16(1):380-9.
13. Barrionuevo P, Kapoor E, Asi N, et al. Efficacy of Pharmacological Therapies for the Prevention of Fractures in Postmenopausal Women: A Network Meta-Analysis. *J Clin Endocrinol Metab* 2019;104(5):1623-30.
14. Saeai N, Peeyananjarassri K, Liabsuetrakul T, Buhachat R, Myriokefalitaki E. Hormone replacement therapy after surgery for epithelial ovarian cancer. *Cochrane Database Syst Rev* 2020;1(1):CD012559.
15. Javadi Z, Merghati-Khoei E, Jafarabadi MA, et al. Efficacy of pharmacological and non-pharmacological interventions on low sexual interest/arousal of peri- and post-menopausal women: a meta-analysis. *Sex Relation Ther* 2019;34(2):242-70.
16. Nudy M, Chinchilli VM, Foy AJ. A systematic review and meta-regression analysis to examine the 'timing hypothesis' of hormone replacement therapy on mortality, coronary heart disease, and stroke. *Int J Cardiol Heart Vasc* 2019;22:123-31.
17. Chen YY, Su TH, Lau HH. Estrogen for the prevention of recurrent urinary tract infections in postmenopausal women: a meta-analysis of randomized controlled trials. *Int Urogynecol J* 2021;32(1):17-25.
18. Javed AA, Mayhew AJ, Shea AK, Raina P. Association Between Hormone Therapy and Muscle Mass in Postmenopausal Women: A Systematic Review and Meta-analysis. *JAMA Netw Open* 2019;2(8):e1910154.
19. Zhou C, Wu Q, Wang Z, Wang Q, Liang Y, Liu S. The Effect of Hormone Replacement Therapy on Cognitive Function in Female Patients With Alzheimer's Disease: A Meta-Analysis. *Am J Alzheimers Dis Other Demen* 2020;35:1533317520938585.
20. Jang Y, Huang H, Leung C. Association of hormone replacement therapy with mortality in colorectal cancer survivor: a systematic review and meta-analysis. *BMC Cancer* 2019;19(1):1199.
21. Zhang XJ, Du YL, Tan XJ, et al. The Relationship Between Hormone Replacement Therapy and Risk of Kidney Cancer in Women: A Meta-Analysis. *Cancer Control* 2020;27(2):1073274820930194.
22. Song J, Jin Z, Han H, et al. Hormone replacement therapies, oral contraceptives, reproductive factors and colorectal adenoma risk: a systematic review and dose-response meta-analysis of observational studies. *Colorectal Dis* 2019;21(7):748-59.
23. Lan Y-L, Wang X, Lou J-C, et al. Update on the effect of exogenous hormone use on glioma risk in women: a meta-analysis of case-control and cohort studies. *J Neurooncol* 2018;137(2):357-65.

24. Liu Y, Ma L, Yang X, et al. Menopausal Hormone Replacement Therapy and the Risk of Ovarian Cancer: A Meta-Analysis. *Front Endocrinol* 2019;10:801.
25. Sun Q, Sun H, Cong L, Zheng Y, Wu N, Cong X. Effects of exogenous hormones and reproductive factors on female melanoma: A meta-analysis. *Clin Epidemiol* 2020;12:1183-203.
26. Azam S, Jacobsen KK, Aro AR, Lynge E, Andersen ZJ. Hormone replacement therapy and mammographic density: a systematic literature review. *Breast Cancer Res Treat* 2020;182(3):555-79.
27. Bach FL, Sairally BZF, Latthe P. Effect of oestrogen therapy on faecal incontinence in postmenopausal women: a systematic review. *Int Urogynecol J* 2020;31(7):1289-97.
28. Biehl C, Plotsker O, Mirkin S. A systematic review of the efficacy and safety of vaginal estrogen products for the treatment of genitourinary syndrome of menopause. *Menopause* 2019;26(4):431-53.
29. Constantine GD, Graham S, Lapane K, et al. Endometrial safety of low-dose vaginal estrogens in menopausal women: a systematic evidence review. *Menopause* 2019;26(7):800-7.
30. Tempfer CB, Hilal Z, Kern P, Juhasz-Boess I, Rezniczek GA. Menopausal Hormone Therapy and Risk of Endometrial Cancer: A Systematic Review. *Cancers* 2020;12(8):2195.
31. Zanello M, Borghese G, Manzara F, et al. Hormonal Replacement Therapy in Menopausal Women with History of Endometriosis: A Review of Literature. *Medicina* 2019;55(8):477.
32. Wang YM, Lewin N, Qaoud Y, Rajae AN, Scheer AS. The oncologic impact of hormone replacement therapy in premenopausal breast cancer survivors: A systematic review. *Breast* 2018;40:123-30.
33. Vargiu V, Amar ID, Rosati A, et al. Hormone replacement therapy and cervical cancer: a systematic review of the literature. *Climacteric* 2021;24(2):120-7.
34. Bezwada P, Shaikh A, Misra D. The Effect of Transdermal Estrogen Patch Use on Cardiovascular Outcomes: A Systematic Review. *J Womens Health* 2017;26(12):1319-25.
35. Bolijn R, Onland-Moret NC, Asselbergs FW, van der Schouw YT. Reproductive factors in relation to heart failure in women: A systematic review. *Maturitas* 2017;106:57-72.
36. Chaves JDP, Figueredo TFM, Warnavin SVC, Pannuti CM, Steffens JP. Sex hormone replacement therapy in periodontology-A systematic review. *Oral Dis* 2020;26(2):270-84.
37. Coquoz A, Gruetter C, Stute P. Impact of micronized progesterone on body weight, body mass index, and glucose metabolism: a systematic review. *Climacteric* 2019;22(2):148-61.
